# Supplementary material
Source: PubMed Central journal article supplement (PMC4076001)
Supplement: ol501254h_si_001.pdf [file ol501254h_si_001.pdf]

## Supporting Information

### Non-Precious Metals Catalyze Formal [4+2] Cycloaddition Reactions of 1,2-Diazines and Siloxy Alkynes Under Ambient Conditions

Chintan S. Sumaria, Yunus E. Türkmen, and Viresh H. Rawal\*

*Department of Chemistry, The University of Chicago, 5735 South Ellis Avenue Chicago, Illinois, 60637, United States*  
vrawal@uchicago.edu

#### Table of Contents

|                                                                          |     |
|--------------------------------------------------------------------------|-----|
| General                                                                  | S1  |
| Materials                                                                | S1  |
| Preparation of 1,2-Diazines                                              | S2  |
| Preparation of Siloxy Alkynes                                            | S4  |
| General Procedures for the Formal [4+2] Cycloaddition Reaction           | S4  |
| Individual Procedures and Characterization for Substrates 3-20           | S5  |
| Procedure for the Formal [2+2] Cycloaddition Reaction                    | S20 |
| Evaluation of Other Metal Catalysts                                      | S20 |
| Evaluation of Cu(II) salts and changing the nucleophilicity of the anion | S21 |
| Evaluation of Other Azadienes                                            | S22 |
| NMR Spectra                                                              | S22 |

#### Experimental Section.

**General:** Reactions were run in flame-dried glassware under an atmosphere of argon, with septa dried over P<sub>2</sub>O<sub>5</sub>. Methylene chloride was purified by passage over activated alumina, through an Innovative Technologies Solvent Drying system. Thin-layer chromatography (TLC) was performed using Whatman silica gel 60 Å F254 plates (250 µm) with F-254 fluorescent indicator and visualized by UV fluorescence quenching, ceric ammonium molybdate or potassium permanganate staining. SiliCycle SiliaFlash P60 silica gel (particle size 40–63 µm) was used for flash chromatography. NMR spectra were measured on Bruker DRX and DMX spectrometers at 500 MHz for <sup>1</sup>H spectra and 125 MHz for <sup>13</sup>C spectra and calibrated from either TMS (δ = 0 for <sup>1</sup>H) or residual CHCl<sub>3</sub> (δ = 7.26 for <sup>1</sup>H and δ = 77.0 for <sup>13</sup>C). <sup>19</sup>F NMR spectra were measured on a Bruker DRX spectrometer at 470 MHz using external calibration with fluorobenzene (δ = -113.15). Mass spectral analysis was measured on Agilent technologies 6224 TOF LC/MS. Infrared spectra were recorded on a Nicolet 6700 FT-IR spectrometer and are reported in frequency of absorption (cm<sup>-1</sup>) using NaBr salt plates using a thin film.

**Materials:** Distilled reagents were sealed under an inert atmosphere and stored in a freezer. All other reagents were stored in a desiccator.

## Preparation of 1,2-Diazines

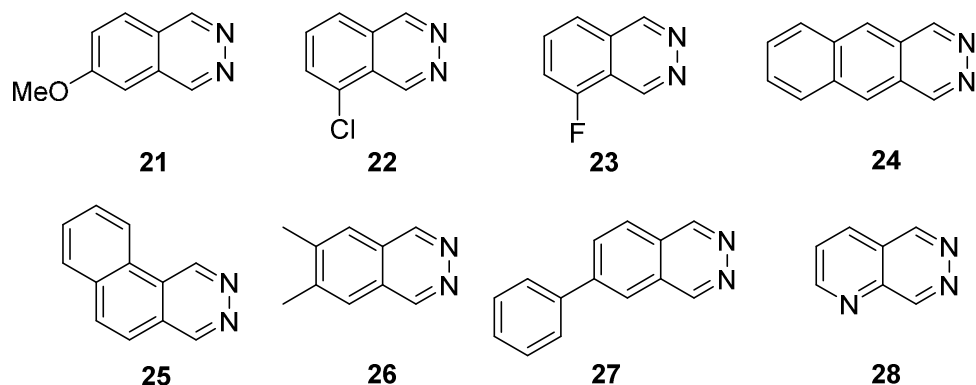

The previously known 1,2-diazines **21**<sup>1</sup>, **22**<sup>1</sup>, **23**<sup>1</sup>, **24**<sup>2</sup>, **25**<sup>1</sup>, **26**<sup>2</sup>, **27**<sup>1</sup>, **28**<sup>1</sup> were prepared according to reported procedures.

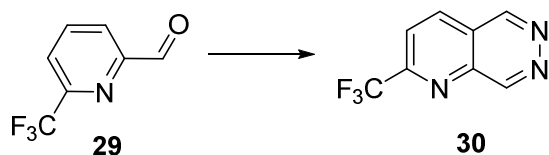

Compound **30** was prepared by modifying a procedure reported by Wegner and co-workers<sup>1</sup>. *n*-BuLi (2.00 ml, 3.20 mmol, 1.6 M in hexane, 1.07 equiv) was added dropwise under nitrogen to a stirred solution of *bis*(2-methoxyethyl)amine (0.49 mL, 3.30 mmol, 1.10 equiv) in a mixture of anhydrous hexanes (10 ml) and THF (2.5 ml) at  $-25\text{ }^{\circ}\text{C}$ . After the addition, the mixture was stirred at  $-25\text{ }^{\circ}\text{C}$  for 30 min to form the lithium amide. A solution of 6-(trifluoromethyl)pyridine-2-carboxaldehyde **29** (525.3 mg, 3.00 mmol, 1.00 equiv) in THF (2 mL) was added dropwise over a period of 30 min at  $-25\text{ }^{\circ}\text{C}$ . The reaction mixture was stirred at  $-20\text{ }^{\circ}\text{C}$  for 45 min and additional *n*-BuLi (2.80 ml, 4.50 mmol, 1.6 M in hexane, 1.50 equiv) was added at  $-20\text{ }^{\circ}\text{C}$ . The reaction mixture was then stirred for another 2 h at the same temperature. After cooling to  $-78\text{ }^{\circ}\text{C}$ , THF (3 ml) and DMF (0.70 ml, 9.0 mmol, 3.00 equiv) were added, and the resulting mixture was stirred for 10 min. It was then allowed to warm to  $0\text{ }^{\circ}\text{C}$  and stirred for 1.5 h. The reaction was quenched with a solution of  $\text{NH}_4\text{Cl}$  (0.48 g, 9.0 mmol, 3.00 equiv) and  $\text{N}_2\text{H}_4\cdot\text{H}_2\text{O}$  (0.70 ml, 11.5 mmol, 80% in  $\text{H}_2\text{O}$ , 3.80 equiv) in  $\text{H}_2\text{O}$  (3 ml). The reaction was allowed to warm to room temperature and stirred overnight. It was then diluted with ethyl acetate (10 ml) and the two phases were partitioned. The aqueous phase was extracted with ethyl acetate ( $3 \times 15\text{ ml}$ ), and the combined organic layers were dried over  $\text{MgSO}_4$ , filtered and thoroughly concentrated *in vacuo* to remove DMF. Purification by two successive flash column chromatographies over  $\text{SiO}_2$  (first with 1:2 acetone:hexanes and second with ethyl acetate as eluent) afforded product **30** (401 mg, 67% yield) as a pale yellow solid.

**30**: <sup>1</sup>H NMR (500 MHz,  $\text{CDCl}_3$ )  $\delta$  9.95 (s, 1H), 9.74 (s, 1H), 8.59 (d,  $J = 8.5\text{ Hz}$ , 1H), 8.21 (d,  $J = 8.5\text{ Hz}$ , 1H)

<sup>1</sup> Kessler, S. N.; Wegner, H. A. *Org. Lett.* **2012**, *14*, 3268.

<sup>2</sup> Türkmen, Y. E.; Montavon, T. J.; Kozmin, S. A.; Rawal, V. H. *J. Am. Chem. Soc.* **2012**, *134*, 9062.

$^{13}\text{C}$  NMR (125 MHz,  $\text{CDCl}_3$ )  $\delta$  154.2, 153.9, 152.8, 150.4, 140.8, 137.0, 123.46, 123.44, 122.4, 121.6, 119.4

$^{19}\text{F}$  NMR (470 MHz,  $\text{CDCl}_3$ )  $\delta$  -68.1

HRMS (ESI) calcd for  $\text{C}_8\text{H}_5\text{F}_3\text{N}_3^+$  ( $\text{M}+\text{H}$ ) $^+$ : 200.0430, Found: 200.0428

$R_f$  0.30-0.40 (ethyl acetate)

Melting Point 147-148 °C

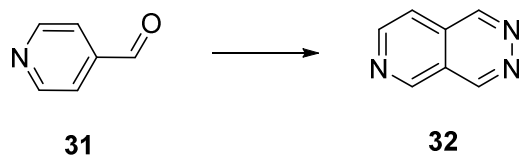

Compound **32** was prepared by modifying a procedure reported by Wegner and co-workers<sup>1</sup>. *n*-BuLi (4.00 ml, 6.40 mmol, 1.6 M in hexane, 1.07 equiv) was added dropwise under nitrogen to a stirred solution of *bis*(2-methoxyethyl)amine (0.98 mL, 6.60 mmol, 1.10 equiv) in a mixture of anhydrous hexanes (10 ml) and THF (6 ml) at  $-25$  °C. After the addition, the mixture was stirred at  $-25$  °C for 30 min to form the lithium amide. A solution of 4-pyridinecarboxaldehyde **31** (643 mg, 6.00 mmol, 1.00 equiv) in THF (5 mL) was added dropwise over a period of 1 hour at  $-25$  °C. The reaction mixture was stirred for 45 min and additional *n*-BuLi (5.60 ml, 9.00 mmol, 1.6 M in hexane, 1.50 equiv) was added at  $-25$  °C. The reaction mixture was then stirred for another 2 h at the same temperature. After cooling to  $-78$  °C, THF (5 ml) and DMF (1.40 ml, 18.0 mmol, 3.00 equiv) were added, and the resulting mixture was stirred for 10 min. It was then allowed to warm to 0 °C and stirred for 1.5 h. The reaction was quenched with a solution of  $\text{NH}_4\text{Cl}$  (0.96 g, 18.0 mmol, 3.00 equiv) and  $\text{N}_2\text{H}_4\cdot\text{H}_2\text{O}$  (0.70 ml, 11.5 mmol, 80% in  $\text{H}_2\text{O}$ , 1.90 equiv) in  $\text{H}_2\text{O}$  (5 ml). The reaction was allowed to warm to room temperature and stirred overnight. It was then diluted with ethyl acetate (15 ml) and the two phases were partitioned. The aqueous phase was extracted with ethyl acetate ( $3 \times 20$  ml), and the combined organic layers were dried over  $\text{MgSO}_4$ , filtered and concentrated *in vacuo*. Purification by flash column chromatography over  $\text{SiO}_2$  (3:1-20:1 EtOAc:hexanes) afforded product **32** (208 mg, 26% yield) as a pale yellow solid.

**32**:  $^1\text{H}$  NMR (500 MHz,  $\text{CDCl}_3$ )  $\delta$  9.70 (s, 1H), 9.68 (s, 1H), 9.51 (s, 1H), 9.10 (d,  $J = 5.8$  Hz, 1H), 7.82 (d,  $J = 5.8$  Hz, 1H)

$^{13}\text{C}$  NMR (125 MHz,  $\text{CDCl}_3$ )  $\delta$  151.3, 150.43, 150.42, 149.6, 128.7, 120.5, 117.9

HRMS (ESI) calcd for  $\text{C}_7\text{H}_6\text{N}_3^+$  ( $\text{M}+\text{H}$ ) $^+$ : 132.0556, Found: 132.0556

$R_f$  0.25-0.35 (10% methanol in ethyl acetate)

Melting Point 168 °C

## Preparation of Siloxy Alkynes

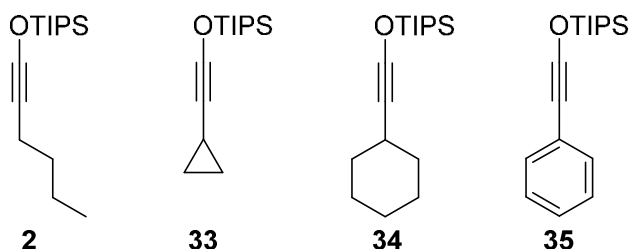

Siloxy alkynes **2**<sup>3</sup>, **33**<sup>4</sup>, **34**<sup>4</sup> and **35**<sup>5</sup> were prepared according to reported procedures.

### General procedure 1 for the cycloaddition reaction of 1,2-diazines and siloxy alkynes catalyzed by $\text{Cu}(\text{MeCN})_4\text{PF}_6$

Tetrakis(acetonitrile)copper(I) hexafluorophosphate,  $\text{Cu}(\text{MeCN})_4\text{PF}_6$  (typically 0.1 equiv) and 1,2-diazine (1.0 equiv) were added to a flame-dried test-tube or a round-bottomed flask equipped with a stir bar. The test-tube/round-bottom flask is then subjected to vacuum, flushed with argon, sealed with a septum, and connected to an argon balloon to maintain positive argon pressure throughout the remainder of the experiment. A stock solution of 2,2'-bipyridine (0.075-0.15 equiv) in  $\text{CH}_2\text{Cl}_2$  was then used to add 2,2'-bipyridine via a syringe, followed by the addition of remaining  $\text{CH}_2\text{Cl}_2$ . This mixture was allowed to stir for 15 minutes before the addition of recently distilled siloxy alkyne (1.5-2.0 equiv) using a syringe, and the reaction monitored by thin-layer chromatography (TLC). After consumption of 1,2-diazine, the reaction was quenched by passing the reaction mixture through a plug of silica (washing with  $\text{CH}_2\text{Cl}_2$ ), and was concentrated under reduced pressure. The excess unreacted siloxy alkyne was removed by Kugelrohr distillation, and the purified product was obtained by flash column chromatography.

### General procedure 2 for the cycloaddition reaction of 1,2-diazines and siloxy alkynes catalyzed by $\text{Ni}(\text{CO})_2(\text{PPh}_3)_2$

Bis(triphenylphosphine)nickel dicarbonyl,  $\text{Ni}(\text{CO})_2(\text{PPh}_3)_2$  (typically 0.1 equiv) and 1,2-diazine were added to a flame-dried test-tube equipped with a stir bar. This test-tube was then subjected to vacuum, flushed with argon, sealed with a septum, and connected to an argon balloon to maintain positive argon pressure throughout the remainder of the experiment.  $\text{CH}_2\text{Cl}_2$  was added by a syringe and the mixture was allowed to stir for 15 minutes before the addition of freshly distilled siloxy alkyne (1.5-2.0 equiv) using another syringe. After complete consumption of 1,2-diazine (as monitored by TLC), the reaction was quenched by passing the reaction mixture through a plug of silica (washing with hexanes), and was concentrated under reduced pressure. The excess unreacted siloxy alkyne was removed by Kugelrohr distillation, and the purified product was obtained by flash column chromatography.

<sup>3</sup> Shubinets, V., Schramm, M. P., Kozmin, S. A. *Org. Synth.* **2010**, 87, 253.

<sup>4</sup> Montavon, T. J., Li, J., Cabrera-Pardo, J. R., Mrksich, M., Kozmin, S. A. *Nat. Chem.* **2012**, 4, 45.

<sup>5</sup> Sun, J., Keller, V. A., Meyer, S. T., Kozmin, S. A. *Adv. Synth. Catal.* **2010**, 352, 839.

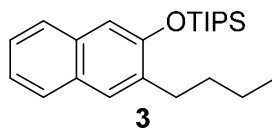

### (3-butyl-naphth-2-yloxy)triisopropylsilane **3**

General procedure 1 was employed for the cycloaddition of phthalazine **1** (65.1 mg, 0.5 mmol, 1.0 equiv) and 1-(triisopropylsiloxy)-1-hexyne **2** (254 mg, 1.0 mmol, 2.0 equiv) using a catalyst combination of tetrakis(acetonitrile)copper(I) hexafluorophosphate (18.6 mg, 0.05 mmol, 0.1 equiv) and 2,2'-bipyridine (5.86 mg, 0.0375 mmol, 0.075 equiv) in 1.0 mL of CH<sub>2</sub>Cl<sub>2</sub>. The reaction was quenched after a period of 4 h. Flash column chromatography (after Kuglerrohr distillation) with hexanes as the eluent afforded compound **3** (143 mg, 80%) as a colorless oil.

General procedure 2 was employed for the cycloaddition of phthalazine **1** (65.1 mg, 0.5 mmol, 1.0 equiv) and 1-(triisopropylsiloxy)-1-hexyne **2** (254 mg, 1.0 mmol, 2.0 equiv) using bis(triphenylphosphine)nickel(0) dicarbonyl (32.0 mg, 0.05 mmol, 0.1 equiv) as catalyst in 1.0 mL of CH<sub>2</sub>Cl<sub>2</sub>. The reaction was quenched after a period of 24 h. Flash column chromatography (after Kuglerrohr distillation) with hexanes as the eluent afforded compound **3** (143 mg, 80%) as a colorless oil.

<sup>1</sup>H NMR (500 MHz, CDCl<sub>3</sub>) δ 7.69 (d, *J* = 8.0 Hz, 1H), 7.62 (d, *J* = 8.0 Hz, 1H), 7.56 (s, 1H), 7.34 (dt, *J* = 8.1, 1.2, Hz, 1H), 7.28 (dt, *J* = 7.5, 1.2 Hz, 1H), 7.09 (s, 1H), 2.77 (t, *J* = 7.8 Hz, 2H), 1.68-1.63 (m, 2H), 1.44-1.37 (m, 5H), 1.15 (d, *J* = 7.5 Hz, 18H), 0.95 (t, *J* = 7.3 Hz, 3H)

<sup>13</sup>C NMR (125 MHz, CDCl<sub>3</sub>) δ 153.0, 135.0, 133.2, 129.0, 128.2, 127.0, 126.0, 125.1, 123.4, 112.4, 32.2, 31.2, 22.8, 18.1, 14.1, 13.1

HRMS (ESI) calcd for C<sub>23</sub>H<sub>37</sub>OSi<sup>+</sup> (M+H)<sup>+</sup>: 357.2608, Found: 357.2605

IR (film): 2945, 2867, 1499, 1466, 1258, 1180, 929, 882, 862, 744, 685 cm<sup>-1</sup>

R<sub>f</sub> 0.57 (hexanes)

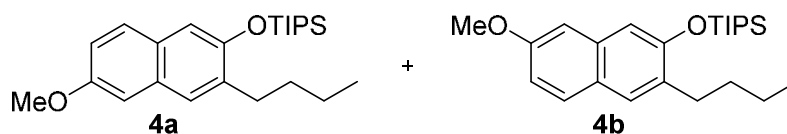

(3-butyl-6-methoxy-naphth-2-yloxy)triisopropylsilane **4a** and (3-butyl-7-methoxy-naphth-2-yloxy)triisopropylsilane **4b**:

General procedure 1 was employed for the cycloaddition of 6-methoxy phthalazine **21** (80.1 mg, 0.5 mmol, 1.0 equiv) and 1-(triisopropylsiloxy)-1-hexyne **2** (254 mg, 1.0 mmol, 2.0 equiv) using a catalyst combination of tetrakis(acetonitrile)copper(I) hexafluorophosphate (18.6 mg, 0.05 mmol, 0.1 equiv) and 2,2'-bipyridine (11.7 mg, 0.075 mmol, 0.15 equiv) in 3.0 mL of CH<sub>2</sub>Cl<sub>2</sub>. The reaction was quenched after a period of 8 h. Flash column chromatography (after Kuglerrohr distillation) with 2% EtOAc in hexanes as the eluent afforded 155 mg (80%) of a product mixture consisting of regioisomers **4a** and **4b** (**4a:4b** = 50:50) as a pale yellow oil.

General procedure 2 was employed for the coupling of 6-methoxy phthalazine **21** (80.1 mg, 0.5 mmol, 1.0 equiv) and 1-(triisopropylsiloxy)-1-hexyne **2** (254 mg, 1.0 mmol, 2.0 equiv) using bis(triphenylphosphine)nickel(0) dicarbonyl (32.0 mg, 0.05 mmol, 0.1 equiv) as catalyst in 3.0 mL of CH<sub>2</sub>Cl<sub>2</sub>. The reaction was quenched after a period of 24 h. Flash chromatography (after Kuglerrohr distillation) with 2% EtOAc in hexanes as the eluent afforded 144 mg (75%) of a product mixture consisting of regioisomers **4a** and **4b** (**4a:4b** = 62:38) as a pale yellow oil.

**4a:** <sup>1</sup>H NMR (500 MHz, CDCl<sub>3</sub>) δ 7.52 (d, *J* = 9 Hz, 1H), 7.47 (s, 1H), 7.06-6.99 (m, 2H), 6.97-6.92 (m, 1H), 3.88 (s, 3H), 2.76 (t, *J* = 8.0 Hz, 2H), 1.70-1.60 (m, 2H), 1.46-1.34 (m, 5H), 1.14 (d, *J* = 7.5 Hz, 18H), 0.95 (t, *J* = 7.5 Hz, 3H)

**4b:** <sup>1</sup>H NMR (500 MHz, CDCl<sub>3</sub>) δ 7.58 (d, *J* = 8.5 Hz, 1H), 7.48 (s, 1H), 7.06-6.99 (m, 2H), 6.97-6.92 (m, 1H), 3.90 (s, 3H), 2.73 (t, *J* = 8.0 Hz, 2H), 1.70-1.60 (m, 2H), 1.46-1.34 (m, 5H), 1.16 (t, *J* = 7.5 Hz, 18H), 0.94 (t, *J* = 7.0 Hz, 3H)

<sup>13</sup>C NMR (125 MHz, CDCl<sub>3</sub>) δ 157.4, 156.1, 153.6, 151.3, 135.3, 134.3, 132.3, 129.8, 128.5, 128.4, 128.0, 127.5, 127.1, 124.5, 117.7, 115.9, 112.5, 111.8, 105.4, 104.4, 55.2 (2C), 32.32, 32.25, 31.18, 30.96, 22.8 (2C), 18.14, 18.13 14.1 (2C), 13.14, 13.10

HRMS (ESI) calcd for C<sub>24</sub>H<sub>39</sub>O<sub>2</sub>Si<sup>+</sup> (M+H)<sup>+</sup>: 387.2714, Found: 387.2715

IR (film): 2946, 2867, 1504, 1464, 1390, 1251, 883 cm<sup>-1</sup>

R<sub>f</sub> 0.20 (2% EtOAc in hexanes)

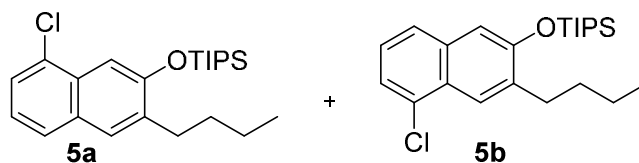

**(3-butyl-8-chloro-naphth-2-yloxy)triisopropylsilane 5a and (3-butyl-5-chloro-naphth-2-yloxy)triisopropylsilane 5b:**

General procedure 1 was employed for the cycloaddition of 5-chloro phthalazine **22** (82.3 mg, 0.5 mmol, 1.0 equiv) and 1-(triisopropylsiloxy)-1-hexyne **2** (254 mg, 1.0 mmol, 2.0 equiv) using a

catalyst combination of tetrakis(acetonitrile)copper(I) hexafluorophosphate (18.6 mg, 0.05 mmol, 0.1 equiv) and 2,2'-bipyridine (7.8 mg, 0.05 mmol, 0.10 equiv) in 1.5 mL of CH<sub>2</sub>Cl<sub>2</sub>. The reaction was quenched after a period of 5 h. Flash column chromatography (after Kuglerrohr distillation) with hexanes as the eluent afforded 155 mg (79%) of a product mixture consisting of regioisomers **5a** and **5b** (**5a**:**5b** = 55:45) as a colorless oil.

General procedure 2 was employed for the coupling of 5-chloro phthalazine **22** (82.3 mg, 0.5 mmol, 1.0 equiv) and 1-(triisopropylsiloxy)-1-hexyne **2** (254 mg, 1.0 mmol, 2.0 equiv) using bis(triphenylphosphine)nickel(0) dicarbonyl (32.0 mg, 0.05 mmol, 0.1 equiv) as catalyst in 1.5 mL of CH<sub>2</sub>Cl<sub>2</sub>. The reaction was quenched after a period of 24 h. Flash column chromatography (after Kuglerrohr distillation) with hexanes as the eluent afforded 145 mg (74%) of a product mixture consisting of regioisomers **5a** and **5b** (**5a**:**5b** = 74:26) as a colorless oil.

**5a**: <sup>1</sup>H NMR (500 MHz, CDCl<sub>3</sub>) δ 7.61 (d, *J* = 8.5 Hz, 1H), 7.57 (s, 1H), 7.55 (s, 1H), 7.44 (dd, *J* = 7.5, 1.1 Hz, 1H), 7.19 (t, *J* = 7.5 Hz, 1H), 2.78 (t, *J* = 8.0 Hz, 2H), 1.71-1.62 (m, 2H), 1.48-1.36 (m, 5H), 1.17 (d, *J* = 7.5 Hz, 18H), 0.95 (t, *J* = 7.5 Hz, 3H)

**5b**: <sup>1</sup>H NMR (500 MHz, CDCl<sub>3</sub>) δ 7.98 (s, 1H), 7.55-7.52 (m, 1H), 7.364 (dd, *J* = 7.5, 1.1 Hz, 1H), 7.24 (t, *J* = 8.0 Hz, 1H), 7.10 (s, 1H), 2.82 (t, *J* = 8.0 Hz, 2H), 1.71-1.62 (m, 2H), 1.48-1.36 (m, 5H), 1.15 (d, *J* = 8.5 Hz, 18H), 0.96 (t, *J* = 7.3 Hz, 3H)

<sup>13</sup>C NMR (125 MHz, CDCl<sub>3</sub>) δ 154.1, 153.7, 136.4, 135.9, 134.5, 131.2, 130.7, 130.0, 129.9, 128.6, 126.1, 125.29, 125.26, 125.1, 124.9, 123.7, 123.2, 123.1, 112.7, 109.3, 32.3, 32.1, 31.4, 31.0, 22.84, 22.77, 18.13, 18.10, 14.06, 14.05, 13.1, 13.0

HRMS (ESI) calcd for C<sub>23</sub>H<sub>36</sub>ClOSi<sup>+</sup> (M+H)<sup>+</sup>: 391.2218, Found: 391.2225

IR (film): 2946, 2867, 1493, 1460, 1263, 1127, 882, 833, 681 cm<sup>-1</sup>

R<sub>f</sub> 0.74 (hexanes)

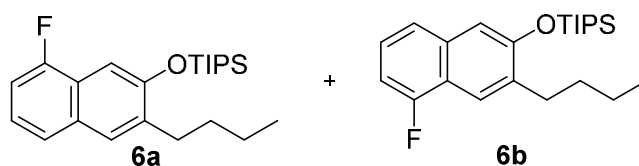

**(3-butyl-8-fluoro-naphth-2-yloxy)triisopropylsilane 6a and (3-butyl-5-fluoro-naphth-2-yloxy)triisopropylsilane 6b:**

General procedure 1 was employed for the cycloaddition of 5-fluoro phthalazine **23** (74.1 mg, 0.5 mmol, 1.0 equiv) and 1-(triisopropylsiloxy)-1-hexyne **2** (254 mg, 1.0 mmol, 2.0 equiv) using a catalyst combination of tetrakis(acetonitrile)copper(I) hexafluorophosphate (18.6 mg, 0.05 mmol, 0.1 equiv) and 2,2'-bipyridine (7.8 mg, 0.05 mmol, 0.10 equiv) in 3.5 mL of CH<sub>2</sub>Cl<sub>2</sub>. The reaction was

quenched after a period of 3.5 h. Flash column chromatography (after Kuglerrohr distillation) with hexanes as the eluent afforded 141.5 mg (76%) of a product mixture consisting of regioisomers **6a** and **6b** (**6a:6b** = 50:50) as a colorless oil.

General procedure 2 was employed for the coupling of 5-chloro phthalazine **23** (74.1 mg, 0.5 mmol, 1.0 equiv) and 1-(triisopropylsiloxy)-1-hexyne **2** (254 mg, 1.0 mmol, 2.0 equiv) using bis(triphenylphosphine)nickel(0) dicarbonyl (32.0 mg, 0.05 mmol, 0.1 equiv) as catalyst in 3.5 mL of CH<sub>2</sub>Cl<sub>2</sub>. The reaction was quenched after a period of 48 h. Flash column chromatography (after Kuglerrohr distillation) with hexanes as the eluent afforded 131 mg (70%) of a product mixture consisting of regioisomers **6a** and **6b** (**6a:6b** = 67:33) as a colorless oil.

**6a**: <sup>1</sup>H NMR (500 MHz, CDCl<sub>3</sub>) δ 7.58 (s, 1H), 7.47 (d, *J* = 8.3 Hz, 1H), 7.33 (s, 1H), 7.21-7.15 (m, 1H), 7.01 (ddd, *J* = 10.9, 7.7, 0.9 Hz, 1H), 2.82-2.75 (m, 2H), 1.71-1.62 (m, 2H), 1.48-1.36 (m, 5H), 1.16 (d, *J* = 7.5 Hz, 18H), 0.95 (t, *J* = 7.4 Hz, 3H)

**6b**: <sup>1</sup>H NMR (500 MHz, CDCl<sub>3</sub>) δ 7.83 (s, 1H), 7.39 (d, *J* = 8.3 Hz, 1H), 7.27-7.22 (m, 1H), 7.10 (d, *J* = 1.8 Hz, 1H), 6.94 (ddd, *J* = 11.1, 7.7, 0.9 Hz, 1H), 2.82-2.75 (m, 2H), 1.71-1.62 (m, 2H), 1.48-1.36 (m, 5H), 1.15 (d, *J* = 7.5 Hz, 18H), 0.95 (t, *J* = 7.4 Hz, 3H)

<sup>13</sup>C NMR (125 MHz, CDCl<sub>3</sub>) δ 159.7, 158.8, 157.7, 156.8, 153.9, 153.4, 136.1, 135.6, 135.5, 135.1, 130.7, 130.6, 128.1, 128.0, 125.1, 125.0, 123.4, 123.2, 122.9, 122.8, 122.7, 122.6, 121.8, 120.9, 120.8, 119.1, 119.0, 112.2, 108.7, 108.5, 107.1, 106.9, 105.1, 32.2, 32.1, 31.3, 31.2, 22.8, 18.1, 14.1, 13.1, 13.0

**6a**: <sup>19</sup>F NMR (470 MHz, CDCl<sub>3</sub>) δ -125.0

**6b**: <sup>19</sup>F NMR (470 MHz, CDCl<sub>3</sub>) δ -124.1

HRMS (ESI) calcd for: C<sub>23</sub>H<sub>36</sub>FOSi<sup>+</sup> (M+H)<sup>+</sup>: 375.2514, Found: 375.2495

IR (film): 2946, 2868, 1607, 1497, 1457, 1262, 1211, 1150, 908, 883, 866, 685 cm<sup>-1</sup>

R<sub>f</sub> 0.56 (hexanes)

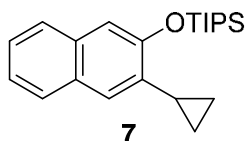

### (3-cyclopropyl-naphth-2-yloxy)triisopropylsilane **7**

General procedure 1 was employed for the cycloaddition of phthalazine **1** (65.1 mg, 0.5 mmol, 1.0 equiv) and 2-cyclopropyl-1-(triisopropylsiloxy)ethyne **33** (238 mg, 1.0 mmol, 2.0 equiv) using a catalyst combination of tetrakis(acetonitrile)copper(I) hexafluorophosphate (18.6 mg, 0.05 mmol, 0.1



equiv) and 2,2'-bipyridine (5.86 mg, 0.0375 mmol, 0.075 equiv) in 1.3 mL of CH<sub>2</sub>Cl<sub>2</sub>. The reaction was quenched after a period of 2.5 h. Flash column chromatography (after Kuglerrohr distillation) with hexanes as the eluent afforded 124 mg (73%) of compound **7** as a colorless oil.

General procedure 2 was employed for the coupling of phthalazine **1** (65.1 mg, 0.5 mmol, 1.0 equiv) and 2-cyclopropyl-1-(triisopropylsiloxy)ethyne **33** (238 mg, 1.0 mmol, 2.0 equiv) using bis(triphenylphosphine)nickel(0) dicarbonyl (32.0 mg, 0.05 mmol, 0.1 equiv) as catalyst in 1.3 mL of CH<sub>2</sub>Cl<sub>2</sub>. The reaction was quenched after a period of 48 h. Flash column chromatography (after Kuglerrohr distillation) with hexanes as the eluent afforded 150 mg (88%) of compound **7** as a colorless oil.

<sup>1</sup>H NMR (500 MHz, CDCl<sub>3</sub>) δ 7.65 (d, *J* = 8.0 Hz, 1H), 7.61 (d, *J* = 8.0 Hz, 1H), 7.37-7.23 (m, 3H), 7.11 (s, 1H), 2.33-2.25 (m, 1H), 1.41 (septet, *J* = 7.5 Hz, 3H), 1.16 (d, *J* = 7.5 Hz, 18H), 1.02-0.94 (m, 2H), 0.79-0.71 (m, 2H)

<sup>13</sup>C NMR (125 MHz, CDCl<sub>3</sub>) δ 153.8, 135.9, 132.9, 129.1, 127.0, 126.0, 125.1, 123.6, 123.4, 112.4, 18.1, 13.1, 10.9, 8.0

HRMS (ESI) calcd for C<sub>22</sub>H<sub>33</sub>OSi<sup>+</sup> (M+H)<sup>+</sup>: 341.2295, Found: 341.2295

IR (film): 2944, 2866, 1498, 1472, 1179, 930, 883, 744, 684 cm<sup>-1</sup>

R<sub>f</sub> 0.44 (hexanes)

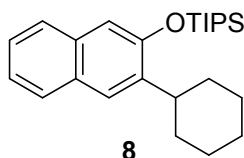

### (3-cyclohexyl-naphth-2-yloxy)triisopropylsilane **8**

General procedure 1 was employed for the cycloaddition of phthalazine **1** (65.1 mg, 0.5 mmol, 1.0 equiv) and 2-cyclohexyl-1-(triisopropylsiloxy)ethyne **34** (281 mg, 1.0 mmol, 2.0 equiv) using a catalyst combination of tetrakis(acetonitrile)copper(I) hexafluorophosphate (18.6 mg, 0.05 mmol, 0.1 equiv) and 2,2'-bipyridine (5.86 mg, 0.0375 mmol, 0.075 equiv) in 1.3 mL of CH<sub>2</sub>Cl<sub>2</sub>. The reaction was quenched after a period of 4 h. Flash column chromatography (after Kuglerrohr distillation) with hexanes as the eluent afforded 145 mg (76%) of compound **8** as a colorless oil, which solidifies upon standing in the refrigerator to form a white solid.

General procedure 2 was employed for the coupling of phthalazine **1** (65.1 mg, 0.5 mmol, 1.0 equiv) and 2-cyclohexyl-1-(triisopropylsiloxy)ethyne **34** (281 mg, 1.0 mmol, 2.0 equiv) using bis(triphenylphosphine)nickel(0) dicarbonyl (32.0 mg, 0.05 mmol, 0.1 equiv) as catalyst in 1.3 mL of CH<sub>2</sub>Cl<sub>2</sub>. The reaction was quenched after a period of 24 h. Flash column chromatography (after

Kuglerohr distillation) with hexanes as the eluent afforded 158 mg (82%) of compound **8** as a colorless oil, which solidifies upon standing in the refrigerator to form a white solid.

**<sup>1</sup>H NMR** (500 MHz, CDCl<sub>3</sub>) δ 7.71 (d, *J* = 8.0 Hz, 1H), 7.61 (d, *J* = 8.0 Hz, 2H), 7.59 (s, 1H), 7.34 (dt, *J* = 7.5, 1.2 Hz, 1H), 7.27 (dt, *J* = 7.5, 1.2 Hz, 1H), 7.09 (s, 1H), 3.10 (br t, 1H), 1.98 (br d, 2H), 1.87 (m, 2H), 1.79 (br d, *J* = 13.0 Hz, 1H), 1.49-1.37 (m, 7H), 1.34-1.25 (m, 1H), 1.16 (d, *J* = 7.5 Hz, 18H)

**<sup>13</sup>C NMR** (125 MHz, CDCl<sub>3</sub>) δ 152.4, 139.7, 132.8, 129.2, 127.2, 125.9, 125.2, 125.1, 123.3, 112.3, 37.5, 33.5, 27.2, 26.5, 18.2, 13.1

**HRMS** (ESI) calcd for C<sub>25</sub>H<sub>39</sub>OSi<sup>+</sup> (M+H)<sup>+</sup>: 383.2765, Found: 383.2771

**IR** (film): cm<sup>-1</sup>: 2925, 2866, 2361, 1653, 1497, 1465, 1448, 1252, 1179

**R<sub>f</sub>** 0.62 (hexanes)

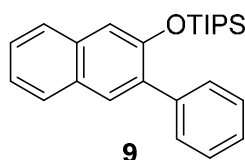

### (3-phenyl-naphth-2-yloxy)triisopropylsilane **9**

General procedure 1 was employed for the cycloaddition of phthalazine **1** (65.1 mg, 0.5 mmol, 1.0 equiv) and 2-phenyl-1-(triisopropylsiloxy)ethyne **35** (206 mg, 0.75 mmol, 1.5 equiv) using a catalyst combination of tetrakis(acetonitrile)copper(I) hexafluorophosphate (1.86 mg, 0.005 mmol, 0.01 equiv) and 2,2'-bipyridine (0.78 mg, 0.005 mmol, 0.01 equiv) in 1.0 mL of CH<sub>2</sub>Cl<sub>2</sub>. Note that instead of using a stock solution to add 2,2'-bipyridine, stock solutions were prepared to add both Cu(MeCN)<sub>4</sub>PF<sub>6</sub> and 2,2'-bipyridine. The reaction was quenched after a period of 7 h. Flash column chromatography (after Kuglerohr distillation) with hexanes as the eluent afforded 166 mg (88%) of compound **9** as a colorless oil.

General procedure 2 was employed for the coupling of phthalazine **1** (65.1 mg, 0.5 mmol, 1.0 equiv) and 2-phenyl-1-(triisopropylsiloxy)ethyne **35** (206 mg, 0.75 mmol, 1.5 equiv) using bis(triphenylphosphine)nickel(0) dicarbonyl (16.0 mg, 0.025 mmol, 0.05 equiv) as catalyst in 1.0 mL of CH<sub>2</sub>Cl<sub>2</sub>. The reaction was quenched after a period of 7 h. Flash column chromatography (after Kuglerohr distillation) with hexanes as the eluent afforded 178 mg (94%) of compound **9** as a colorless oil.

**<sup>1</sup>H NMR** (500 MHz, CDCl<sub>3</sub>) δ 7.77 (d, *J* = 8.0 Hz, 1H), 7.75 (s, 1H), 7.68 (d, *J* = 8.0 Hz, 1H), 7.57 (d, *J* = 7.5 Hz, 2H), 7.43-7.39 (m, 3H), 7.33 (dt, *J* = 7.7, 1.1 Hz, 2H), 7.24 (s, 1H), 1.20 (sept, *J* = 7.5 Hz, 3H), 0.99 (d, *J* = 7.5 Hz, 18H)

$^{13}\text{C}$  NMR (125 MHz,  $\text{CDCl}_3$ )  $\delta$  151.7, 139.1, 134.9, 133.9, 129.91, 129.86, 129.1, 127.7, 127.6, 126.9, 126.1, 126.0, 123.8, 113.8, 17.9, 12.9

HRMS (ESI) calcd for  $\text{C}_{25}\text{H}_{33}\text{OSi}^+$  (M+H) $^+$ : 377.2295, Found: 377.2296

IR (film):  $\text{cm}^{-1}$ : 2944, 2866, 1462, 1437, 1201, 1179, 857, 685

$R_f$  0.24 (hexanes)

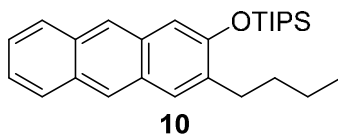

### (3-butylanthrac-2-yloxy)triisopropylsilane **10**

General procedure 1 was employed for the cycloaddition of benzo[g]phthalazine **24** (90.1 mg, 0.5 mmol, 1.0 equiv) and 1-(triisopropylsiloxy)-1-hexyne **2** (254 mg, 1.0 mmol, 2.0 equiv) using a catalyst combination of tetrakis(acetonitrile)copper(I) hexafluorophosphate (18.6 mg, 0.05 mmol, 0.1 equiv) and 2,2'-bipyridine (7.8 mg, 0.05 mmol, 0.10 equiv) in 2.0 mL of  $\text{CH}_2\text{Cl}_2$ . The reaction was quenched after a period of 3.5 h. Flash column chromatography (after Kuglerrohr distillation) with hexanes as the eluent afforded 151 mg (74%) of compound **10** as a colorless oil.

General procedure 2 was employed for the coupling of benzo[g]phthalazine **24** (90.1 mg, 0.5 mmol, 1.0 equiv) and 1-(triisopropylsiloxy)-1-hexyne **2** (254 mg, 1.0 mmol, 2.0 equiv) using bis(triphenylphosphine)nickel(0) dicarbonyl (32.0 mg, 0.05 mmol, 0.1 equiv) as catalyst in 2.0 mL of  $\text{CH}_2\text{Cl}_2$ . The reaction was quenched after a period of 24 h. Flash column chromatography (after Kuglerrohr distillation) with hexanes as the eluent afforded 130 mg (64%) of compound **10** as a colorless oil.

$^1\text{H}$  NMR (500 MHz,  $\text{CDCl}_3$ )  $\delta$  8.24 (s, 1H), 8.17 (s, 1H), 7.90 (t,  $J = 8.5$  Hz, 2H), 7.71 (s, 1H), 7.41-7.31 (m, 2H), 7.22 (s, 1H), 2.81 (t,  $J = 7.8$  Hz, 2H), 1.74-1.68 (m, 2H), 1.49-1.40 (m, 5H), 1.17 (d,  $J = 7.5$  Hz, 18H), 0.97 (t,  $J = 7.3$  Hz, 3H)

$^{13}\text{C}$  NMR (125 MHz,  $\text{CDCl}_3$ )  $\delta$  153.0, 136.2, 132.0, 131.5, 130.4, 128.5, 128.1, 127.8, 127.5, 125.0, 124.9, 124.1, 123.3, 110.7, 32.1, 31.4, 22.8, 18.2, 14.1, 13.1

HRMS (ESI) calcd for  $\text{C}_{27}\text{H}_{39}\text{OSi}^+$  (M+H) $^+$ : 407.2765, Found: 407.2764

IR (film): 2945, 2866, 1634, 1459, 1279, 1214, 1148, 882, 739, 685  $\text{cm}^{-1}$

$R_f$  0.42 (hexanes)

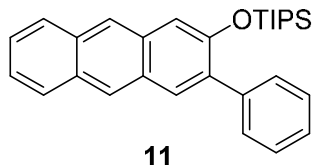

### (3-phenylanthrac-2-yloxy)triisopropylsilane **11**

General procedure 1 was employed for the cycloaddition of benzo[*g*]phthalazine **24** (90.1 mg, 0.5 mmol, 1.0 equiv) and 2-phenyl-1-(triisopropylsiloxy)ethyne **35** (206 mg, 0.75 mmol, 1.5 equiv) using a catalyst combination of tetrakis(acetonitrile)copper(I) hexafluorophosphate (1.86 mg, 0.005 mmol, 0.01 equiv) and 2,2'-bipyridine (0.78 mg, 0.005 mmol, 0.01 equiv) in 2.0 mL of CH<sub>2</sub>Cl<sub>2</sub>. Note that instead of using a stock solution to add 2,2'-bipyridine, stock solutions were prepared to add both Cu(MeCN)<sub>4</sub>PF<sub>6</sub> and 2,2'-bipyridine. The reaction was quenched after a period of 4 h. Flash column chromatography (after Kuglerrohr distillation) with hexanes as the eluent afforded 162 mg (76%) of compound **11** as pale yellow oil.

General procedure 2 was employed for the coupling of benzo[*g*]phthalazine **24** (90.1 mg, 0.5 mmol, 1.0 equiv) and 2-phenyl-1-(triisopropylsiloxy)ethyne **35** (206 mg, 0.75 mmol, 1.5 equiv) using bis(triphenylphosphine)nickel(0) dicarbonyl (16.0 mg, 0.025 mmol, 0.05 equiv) as catalyst in 2.0 mL of CH<sub>2</sub>Cl<sub>2</sub>. The reaction was quenched after a period of 6 h. Flash column chromatography (after Kuglerrohr distillation) with hexanes as the eluent afforded 178 mg (83%) of compound **11** as pale yellow oil.

<sup>1</sup>H NMR (500 MHz, CDCl<sub>3</sub>) δ 8.33 (s, 1H), 8.23 (s, 1H), 7.96-7.89 (m, 3H), 7.61 (dt, *J* = 7.5, 1.5 Hz, 2H), 7.45-7.31 (m, 6H), 1.24 (sept, *J* = 7.5 Hz, 3H), 1.00 (d, *J* = 7.5 Hz, 18 H)

<sup>13</sup>C NMR (125 MHz, CDCl<sub>3</sub>) δ 151.6, 139.0, 136.1, 132.3, 132.0, 130.61, 130.60, 129.9, 128.4, 128.2, 127.7, 127.6, 127.0, 126.1, 125.4, 124.4, 123.5, 112.2, 17.9, 12.9

HRMS (ESI) calcd for C<sub>29</sub>H<sub>35</sub>OSi<sup>+</sup> (M+H)<sup>+</sup>: 427.2452, Found: 427.2434

IR (film): cm<sup>-1</sup>: 2944, 2866, 1457, 1436, 1211, 1175, 899, 884, 698

R<sub>f</sub> 0.26 (hexanes)

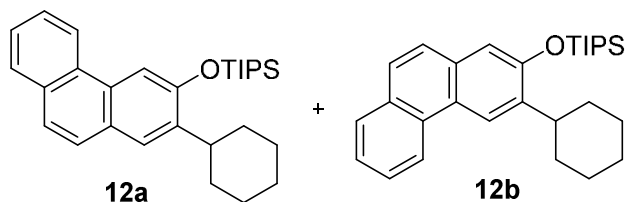

**(2-cyclohexylphenanthr-3-yloxy)triisopropylsilane 12a and (3-cyclohexylphenanthr-2-yloxy)triisopropylsilane 12b:**

General procedure 1 was employed for the cycloaddition of benzo[*f*]phthalazine **25** (90.1 mg, 0.5 mmol, 1.0 equiv) and 2-cyclohexyl-1-(triisopropylsiloxy)ethyne **34** (281 mg, 1.0 mmol, 2.0 equiv) using a catalyst combination of tetrakis(acetonitrile)copper(I) hexafluorophosphate (18.6 mg, 0.05 mmol, 0.1 equiv) and 2,2'-bipyridine (7.8 mg, 0.05 mmol, 0.10 equiv) in 10.0 mL of CH<sub>2</sub>Cl<sub>2</sub>. The reaction was quenched after a period of 14 h. Flash column chromatography (after Kuglerohr distillation) with hexanes as the eluent afforded 152 mg (70%) of a product mixture consisting of regioisomers **12a** and **12b** (**12a:12b** = 64:36) as a colorless oil.

General procedure 2 was employed for the coupling of benzo[*f*]phthalazine **25** (90.1 mg, 0.5 mmol, 1.0 equiv) and 2-cyclohexyl-1-(triisopropylsiloxy)ethyne **34** (281 mg, 1.0 mmol, 2.0 equiv) using bis(triphenylphosphine)nickel(0) dicarbonyl (32.0 mg, 0.05 mmol, 0.1 equiv) as catalyst in 10.0 mL of CH<sub>2</sub>Cl<sub>2</sub>. The reaction was quenched after a period of 120 h. Flash column chromatography (after Kuglerohr distillation) with hexanes as the eluent afforded 124 mg (57%) of a product mixture consisting of regioisomers **12a** and **12b** (**12a:12b** = 44:56) as a colorless oil.

**12a:** <sup>1</sup>H NMR (500 MHz, CDCl<sub>3</sub>) δ 8.63 (d, *J* = 8.3 Hz, 1H), 8.47 (s, 1H), 7.86-7.80 (m, 1H), 7.67-7.47 (m, 4H), 7.18 (d, *J* = 1.4 Hz, 1H), 3.25-3.12 (m, 1H), 2.07-1.98 (m, 2H), 1.95-1.86 (m, 2H), 1.85-1.77 (m, 1H), 1.62-1.28 (m, 8H), 1.17 (d, 18H, *J* = 7.5 Hz)

**12b:** <sup>1</sup>H NMR (500 MHz, CDCl<sub>3</sub>) δ 8.43 (d, *J* = 8.1, 1H), 7.99 (s, 1H), 7.86-7.80 (m, 1H), 7.67-7.47 (m, 5H), 3.25-3.12 (m, 1H), 2.07-1.98 (m, 2H), 1.95-1.86 (m, 2H), 1.85-1.77 (m, 1H), 1.62-1.28 (m, 8H), 1.20 (d, *J* = 7.5 Hz, 18H)

<sup>13</sup>C NMR (125 MHz, CDCl<sub>3</sub>) δ 153.0, 152.8, 139.0, 138.9, 132.0, 131.3, 131.1, 130.4, 129.6, 129.3, 128.52, 128.51, 126.9, 126.7, 126.34, 126.29, 126.26, 126.02, 125.98, 125.96, 125.3, 124.6, 124.2, 122.2, 122.1, 120.5, 114.5, 109.5, 37.7, 37.4, 33.7, 33.4, 27.3, 27.2, 26.51, 26.48, 18.23, 18.18, 13.2 (2C)

HRMS (ESI) calcd for C<sub>29</sub>H<sub>41</sub>OSi<sup>+</sup> (M+H)<sup>+</sup>: 433.2921, Found: 433.2921

IR (film): 2866, 2851, 2361, 2339, 1498, 1461, 1265, 1222, 999, 879, 743, 684, 668 cm<sup>-1</sup>

R<sub>f</sub> 0.34 (hexanes)

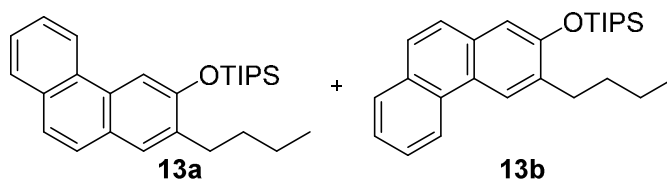

**(2-butylphenanthr-3-yloxy)triisopropylsilane 13a and (3-butylphenanthr-2-yloxy)triisopropylsilane 13b:**

General procedure 1 was employed for the cycloaddition of benzo[*f*]phthalazine **25** (90.1 mg, 0.5 mmol, 1.0 equiv) and 1-(triisopropylsiloxy)-1-hexyne **2** (254 mg, 1.0 mmol, 2.0 equiv) using a catalyst combination of tetrakis(acetonitrile)copper(I) hexafluorophosphate (18.6 mg, 0.05 mmol, 0.1 equiv) and 2,2'-bipyridine (7.8 mg, 0.05 mmol, 0.10 equiv) in 10.0 mL of CH<sub>2</sub>Cl<sub>2</sub>. The reaction was quenched after a period of 14 h. Flash column chromatography (after Kuglerrohr distillation) with hexanes as the eluent afforded 145 mg (71%) of a product mixture consisting of regioisomers **13a** and **13b** (**13a:13b** = 73:27) as a colorless oil.

General procedure 2 was employed for the coupling of benzo[*f*]phthalazine **25** (90.1 mg, 0.5 mmol, 1.0 equiv) and 1-(triisopropylsiloxy)-1-hexyne **2** (254 mg, 1.0 mmol, 2.0 equiv) using bis(triphenylphosphine)nickel(0) dicarbonyl (32.0 mg, 0.05 mmol, 0.1 equiv) as catalyst in 10.0 mL of CH<sub>2</sub>Cl<sub>2</sub>. The reaction was quenched after a period of 120 h. Flash column chromatography (after Kuglerrohr distillation) with hexanes as the eluent afforded 159 mg (78%) of a product mixture consisting of regioisomers **13a** and **13b** (**13a:13b** = 40:60) as a colorless oil.

**13a:** <sup>1</sup>H NMR (500 MHz, CDCl<sub>3</sub>) δ 8.58 (d, *J* = 8.0 Hz, 1H), 8.41 (s, 1H), 7.80-7.77 (m, 1H), 7.62-7.43 (m, 4H), 7.19 (s, 1H), 2.88 (t, *J* = 7.9 Hz, 2H), 1.77-1.66 (m, 2H), 1.51-1.35 (m, 5H), 1.154 (d, *J* = 7.5 Hz, 18H), 0.97 (t, *J* = 7.5 Hz, 3H)

**13b:** <sup>1</sup>H NMR (500 MHz, CDCl<sub>3</sub>) δ 8.44 (d, *J* = 8.0 Hz, 1H), 8.00 (s, 1H), 7.82-7.78 (m, 1H), 7.62-7.43 (m, 5H), 2.814 (t, *J* = 7.9 Hz, 2H), 1.77-1.66 (m, 2H), 1.51-1.35 (m, 5H), 1.186 (d, *J* = 7.5 Hz, 18H), 0.96 (t, *J* = 7.5 Hz, 3H)

<sup>13</sup>C NMR (125 MHz, CDCl<sub>3</sub>) δ 153.6, 153.4, 134.22, 134.20, 132.0, 131.7, 131.1, 130.3, 129.69, 129.68, 129.3, 128.55, 128.49, 126.8, 126.5, 126.32, 126.29, 126.05, 126.0, 125.3, 124.58, 124.57, 124.3, 123.9, 122.2, 122.1, 114.6, 109.5, 32.6, 32.3, 31.6, 30.9, 22.9, 22.8, 18.19, 18.15, 14.13, 14.11, 13.18, 13.14

HRMS (ESI) calcd for C<sub>27</sub>H<sub>39</sub>OSi<sup>+</sup> (M+H)<sup>+</sup>: 407.2765, Found: 407.2753

IR (film): 2945, 2866, 1499, 1460, 1274, 1224, 1152, 999, 882, 866, 742, 646 cm<sup>-1</sup>

R<sub>f</sub> 0.41 (hexanes)

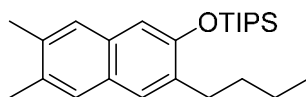

**14**

**(3-butyl-6,7-dimethylnaphth-2-yloxy)triisopropylsilane 14**

General procedure 1 was employed for the cycloaddition of 6,7-dimethylphthalazine **26** (79.1 mg, 0.5 mmol, 1.0 equiv) and 1-(triisopropylsiloxy)-1-hexyne **2** (254 mg, 1.0 mmol, 2.0 equiv) using a catalyst combination of tetrakis(acetonitrile)copper(I) hexafluorophosphate (18.6 mg, 0.05 mmol, 0.1 equiv) and 2,2'-bipyridine (7.8 mg, 0.05 mmol, 0.10 equiv) in 6.0 mL of CH<sub>2</sub>Cl<sub>2</sub>. The reaction was quenched after a period of 12 h. Flash column chromatography (after Kuglerrohr distillation) with hexanes as the eluent afforded 143 mg (74%) of compound **14** as a colorless oil.

General procedure 2 was employed for the coupling of 6,7-dimethylphthalazine **26** (79.1 mg, 0.5 mmol, 1.0 equiv) and 1-(triisopropylsiloxy)-1-hexyne **2** (254 mg, 1.0 mmol, 2.0 equiv) using bis(triphenylphosphine)nickel(0) dicarbonyl (32.0 mg, 0.05 mmol, 0.1 equiv) as catalyst in 6.0 mL of CH<sub>2</sub>Cl<sub>2</sub>. The reaction was quenched after a period of 48 h. Flash column chromatography (after Kuglerrohr distillation) with hexanes as the eluent afforded 146 mg (76%) of compound **14** as a colorless oil.

<sup>1</sup>H NMR (500 MHz, CDCl<sub>3</sub>) δ 7.44 (s, 2H), 7.39 (s, 1H), 7.00 (s, 1H), 2.74 (t, *J* = 7.8 Hz, 2H), 2.37 (s, 3H), 2.36 (s, 3H), 1.67-1.61 (m, 2H), 1.44-1.34 (m, 5H), 1.14 (d, *J* = 7.5 Hz, 18H), 0.94 (t, *J* = 7.5 Hz, 3H)

<sup>13</sup>C NMR (125 MHz, CDCl<sub>3</sub>) δ 152.4, 134.6, 133.9, 132.7, 132.0, 127.9, 127.2, 126.5, 125.7, 111.6, 32.3, 31.1, 22.7, 20.1, 20.0, 18.1, 14.1, 13.1

HRMS (ESI) calcd for C<sub>25</sub>H<sub>41</sub>OSi<sup>+</sup> (M+H)<sup>+</sup>: 385.2921, Found: 385.2918

IR (film): 2944, 2867, 1498, 1466, 1372, 1253, 1208, 1146, 905, 882 cm<sup>-1</sup>

R<sub>f</sub> 0.56 (hexanes)

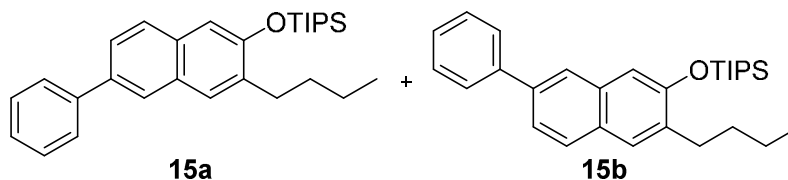

**(3-butyl-6-phenyl-naphth-2-yloxy)triisopropylsilane 15a and (3-butyl-7-phenyl-naphth-2-yloxy)triisopropylsilane 15b:**

General procedure 1 was employed for the cycloaddition of 6-phenyl phthalazine **27** (103.1 mg, 0.5 mmol, 1.0 equiv) and 1-(triisopropylsiloxy)-1-hexyne **2** (254 mg, 1.0 mmol, 2.0 equiv) using a catalyst combination of tetrakis(acetonitrile)copper(I) hexafluorophosphate (18.6 mg, 0.05 mmol, 0.1 equiv) and 2,2'-bipyridine (7.8 mg, 0.05 mmol, 0.10 equiv) in 8.0 mL of CH<sub>2</sub>Cl<sub>2</sub>. The reaction was quenched after a period of 7 h. Flash column chromatography (after Kuglerrohr distillation) with hexanes as the eluent afforded 156 mg (72%) of a product mixture consisting of regioisomers **15a** and **15b** (**15a**:**15b** = 60:40) as a colorless oil.

General procedure 2 was employed for the coupling of 6-phenyl phthalazine **27** (103.1 mg, 0.5 mmol, 1.0 equiv) and 1-(triisopropylsiloxy)-1-hexyne **2** (254 mg, 1.0 mmol, 2.0 equiv) using bis(triphenylphosphine)nickel(0) dicarbonyl (32.0 mg, 0.05 mmol, 0.1 equiv) as catalyst in 8.0 mL of CH<sub>2</sub>Cl<sub>2</sub>. The reaction was quenched after a period of 96 h. Flash column chromatography (after Kuglerrohr distillation) with hexanes as the eluent afforded 46 mg (21%) of a product mixture consisting of regioisomers **15a** and **15b** (**15a**:**15b** = 50:50) as a colorless oil.

**15a**: <sup>1</sup>H NMR (500 MHz, CDCl<sub>3</sub>) δ 7.91 (s, 1H), 7.79-7.53 (m, 5H), 7.49-7.42 (m, 2H), 7.38-7.31 (m, 1H), 7.12 (s, 1H), 2.84-2.76 (m, 2H), 1.73-1.63 (m, 2H), 1.50-1.38 (m, 5H), 1.16 (d, *J* = 7.5 Hz, 18H), 0.96 (t, *J* = 7.4 Hz, 3H)

**15b**: <sup>1</sup>H NMR (500 MHz, CDCl<sub>3</sub>) δ 7.83 (s, 1H), 7.79-7.53 (m, 5H), 7.49-7.42 (m, 2H), 7.38-7.31 (m, 1H), 7.16 (m, 1H), 2.84-2.76 (m, 2H), 1.73-1.63 (m, 2H), 1.50-1.38 (m, 5H), 1.16 (d, *J* = 7.5 Hz, 18H), 0.96 (t, *J* = 7.4 Hz, 3H)

<sup>13</sup>C NMR (125 MHz, CDCl<sub>3</sub>) δ 153.4, 153.2, 141.56, 141.52, 137.9, 136.3, 135.5, 135.2, 133.5, 132.4, 129.3, 128.74, 128.71, 128.6, 128.3, 128.0, 127.5, 127.4, 127.2, 127.1, 126.9, 126.6, 125.0, 124.9, 124.1, 123.2, 112.7, 112.2, 32.23, 32.22 31.2 (2C), 22.8 (2C), 18.2 (2C), 14.1 (2C), 13.1 (2C)

HRMS (ESI) calcd for C<sub>29</sub>H<sub>41</sub>OSi<sup>+</sup> (M+H)<sup>+</sup>: 433.2921, Found: 433.2910

IR (film): 2946, 2867, 1466, 1253, 1217, 884, 696 cm<sup>-1</sup>

R<sub>f</sub> 0.34 (hexanes)

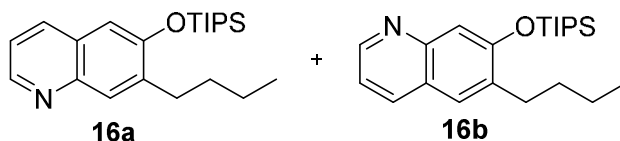

### (7-butyl-6-quinolyloxy)-triisopropylsilane **16a** and (6-butyl-7-quinolyloxy)-triisopropylsilane **16b**

Tetrakis(acetonitrile)copper(I) hexafluorophosphate, Cu(MeCN)<sub>4</sub>PF<sub>6</sub> (18.6 mg, 0.05 mmol, 0.1 equiv) and pyrido[2,3-*d*]pyridazine **28** (65.6 mg, 0.5 mmol, 1.0 equiv) were added to a flame-dried test-tube equipped with a stir bar. This test-tube was subjected to vacuum, flushed with argon, sealed with a septum, and connected to an argon balloon to maintain positive argon pressure throughout the remainder of the experiment. A stock solution (0.4 mL) of 2,2'-bipyridine in anhydrous 1,2-dichloroethane was then used to add 2,2'-bipyridine (11.7 mg, 0.075 mmol, 0.15 equiv) via a syringe, followed by the addition of another 0.6 mL of anhydrous 1,2-dichloroethane. The test-tube was transferred to an oil bath at about 85 °C for 1,2-dichloroethane to undergo reflux over the sides of the test-tube. The reaction mixture was then allowed to stir for 15 minutes before the addition of freshly distilled 1-(triisopropylsiloxy)-1-hexyne **2** (254 mg, 1.0 mmol, 2.0 equiv) with a syringe. After 48 h,



heating was discontinued to cool the reaction mixture to room temperature. The catalyst was separated by passing it through a plug of silica (washing with CH<sub>2</sub>Cl<sub>2</sub>), thus quenching the reaction. The mixture was consequently concentrated and the excess unreacted siloxy alkyne removed by Kugelrohr distillation. By using a 10% ethyl acetate in hexanes solvent mixture as an eluent, flash column chromatography (after Kugelrohr distillation) afforded 74 mg (41%) of a product mixture consisting of **16a** and **16b** (**16a:16b** = 55:45).

**16a:** <sup>1</sup>H NMR (500 MHz, CDCl<sub>3</sub>) δ 8.72 (dd, *J* = 4.3, 1.7 Hz, 1H), 7.94 (d, *J* = 8.0 Hz, 1H), 7.85 (s, 1H), 7.28-7.24 (m, 1H), 7.032 (s, 1H), 2.82 (t, *J* = 7.8 Hz, 2H), 1.73-1.63 (m, 2H), 1.52-1.35 (m, 5H), 1.16 (d, *J* = 7.5 Hz, 18H), 0.95 (t, *J* = 7.4 Hz, 3H)

**16b:** <sup>1</sup>H NMR (500 MHz, CDCl<sub>3</sub>) δ 8.75 (dd, *J* = 4.3, 1.7 Hz, 1H), 8.00 (d, *J* = 8.1 Hz, 1H), 7.52 (s, 1H), 7.39 (s, 1H), 7.21 (dd, *J* = 4.3, 3.9, 1H), 2.80 (t, *J* = 7.8 Hz, 2H), 1.73-1.63 (m, 2H), 1.52-1.35 (m, 5H), 1.16 (d, *J* = 7.5 Hz, 18H), 0.96 (t, *J* = 7.4 Hz, 3H)

<sup>13</sup>C NMR (125 MHz, CDCl<sub>3</sub>) δ 156.2, 153.3, 149.2, 147.6, 144.2, 139.2, 136.1, 135.2, 134.2, 129.3, 127.8, 127.4, 123.7, 120.3, 118.8, 117.7, 113.4, 111.5, 32.0, 31.8, 31.1, 31.0, 22.7, 22.6, 18.04, 18.03, 13.97, 13.95, 13.03, 12.99

**HRMS** (ESI) calcd for C<sub>22</sub>H<sub>36</sub>NOSi<sup>+</sup> (M+H)<sup>+</sup>: 358.2561, Found: 358.2570

**IR** (film): 2945, 2866, 1498, 1462, 1271, 1223, 908, 882, 865, 742, 683, 645 cm<sup>-1</sup>

**R<sub>f</sub>** 0.40-0.45 (1:3 ethyl acetate:hexanes)

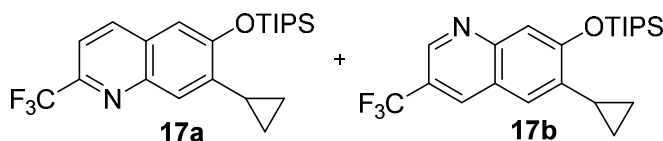

**7-cyclopropyl-2-(trifluoromethyl)-6-(triisopropylsiloxy)quinoline 17a and 6-cyclopropyl-2-(trifluoromethyl)-7-(triisopropylsiloxy)quinoline 17b**

General procedure 1 was employed for the cycloaddition of 2-(trifluoromethyl)-pyrido[2,3-*d*]pyridazine **30** (99.6 mg, 0.5 mmol, 1.0 equiv) and 2-cyclopropyl-1-(triisopropylsiloxy)ethyne **33** (238 mg, 1.0 mmol, 2.0 equiv) using a catalyst combination of tetrakis(acetonitrile)copper(I) hexafluorophosphate (18.6 mg, 0.05 mmol, 0.1 equiv) and 2,2'-bipyridine (7.8 mg, 0.05 mmol, 0.10 equiv) in 1.0 mL of CH<sub>2</sub>Cl<sub>2</sub>. The reaction was quenched after a period of 6 h. Flash column chromatography (after Kugelrohr distillation) with 2% EtOAc in hexanes solvent mixture as the eluent afforded 132 mg (64%) of a product mixture consisting of regioisomers **17a** and **17b** (**17a:17b** = 55:45) as pale yellow oil.

**Catalysis by AgNTf<sub>2</sub>:** Silver bis(trifluoromethanesulfonyl)imide, AgNTf<sub>2</sub> (9.3 mg, 0.025 mmol, 0.05 equiv) and 2-(trifluoromethyl)-pyrido[2,3-*d*]pyridazine **30** (99.6 mg, 0.5 mmol, 1.0 equiv) were added to a flame-dried test-tube equipped with a stir bar. The test-tube is then subjected to vacuum, flushed with N<sub>2</sub>, sealed with a septum, and positive N<sub>2</sub> pressure throughout the remainder of the experiment. 2,2'-bipyridine (3.90 mg, 0.025 mmol, 0.05 equiv) in CH<sub>2</sub>Cl<sub>2</sub> (0.2 mL) was added via a syringe, followed by the addition of 0.8 mL of CH<sub>2</sub>Cl<sub>2</sub>. This mixture was allowed to stir for 15 minutes before the addition of 2-cyclopropyl-1-(triisopropylsiloxy)ethyne **33** (238 mg, 1.0 mmol, 2.0 equiv) using a syringe, and the reaction monitored by thin-layer chromatography (TLC). After 2 hours, the reaction was quenched by passing the reaction mixture through a plug of silica (washing with CH<sub>2</sub>Cl<sub>2</sub>), and was concentrated under reduced pressure. Flash column chromatography (after Kuglerrohr distillation to remove unreacted siloxy alkyne) with 2% ethyl acetate in hexanes as the eluent afforded 145 mg (71%) of a product mixture consisting of regioisomers **17a** and **17b** (**17a**:**17b** = 67:33) as pale yellow oil.

**17a:** <sup>1</sup>H NMR (500 MHz, CDCl<sub>3</sub>) δ 8.14-8.08 (m, 1H), 7.64 (s, 1H), 7.58 (d, *J* = 8.5 Hz, 1H), 7.11 (s, 1H), 2.40-2.30 (m, 1H), 1.42 (septet, *J* = 7.5 Hz, 3H), 1.16 (d, *J* = 7.5 Hz, 18H), 1.14-1.04 (m, 2H), 0.88-0.83 (m, 2H)

**17b:** <sup>1</sup>H NMR (500 MHz, CDCl<sub>3</sub>) δ 8.14-8.08 (m, 1H), 7.53 (d, *J* = 8.5 Hz, 1H), 7.45 (s, 1H), 7.30 (s, 1H), 2.40-2.30 (m, 1H), 1.48 (septet, *J* = 7.5 Hz, 3H), 1.16 (d, *J* = 7.5 Hz, 18H), 1.14-1.04 (m, 2H), 0.81-0.76 (m, 2H)

<sup>13</sup>C NMR (125 MHz, CDCl<sub>3</sub>) δ 158.0, 155.7, 147.5, 147.1, 146.9, 145.6, 143.4, 142.5, 139.8, 136.5, 135.6, 128.31, 128.30, 125.2, 124.5, 122.9, 122.7, 122.6, 120.77, 120.76, 115.89, 115.87, 114.44, 114.42, 113.95, 113.94, 111.2, 18.01, 17.97, 13.06, 13.02, 11.0, 10.8, 9.2, 8.4

**17a:** <sup>19</sup>F NMR (470 MHz, CDCl<sub>3</sub>) δ -67.3

**17b:** <sup>19</sup>F NMR (470 MHz, CDCl<sub>3</sub>) δ -67.3

**HRMS** (ESI) calcd for C<sub>22</sub>H<sub>31</sub>F<sub>3</sub>NOSi<sup>+</sup> (M+H)<sup>+</sup>: 410.2122, Found: 410.2118

**IR** (film): 2947, 2869, 1473, 1334, 1229, 1183, 1090, 883 cm<sup>-1</sup>

**R<sub>f</sub>** 0.5-0.6 (5% ethyl acetate in hexanes)

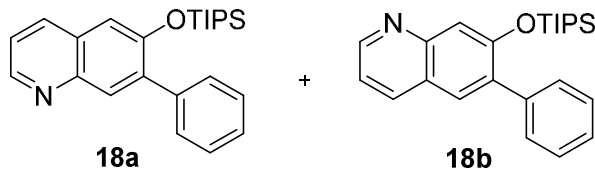

**(7-phenyl-6-quinolyloxy)-triisopropylsilane 18a and (6-phenyl-7-quinolyloxy)-triisopropylsilane 18b**

General procedure 1 was employed for the cycloaddition of pyrido[2,3-*d*]pyridazine **28** (65.6 mg, 0.5 mmol, 1.0 equiv) and 2-phenyl-1-(triisopropylsiloxy)ethyne **35** (275 mg, 1.0 mmol, 2.0 equiv) using a catalyst combination of tetrakis(acetonitrile)copper(I) hexafluorophosphate (18.6 mg, 0.05 mmol, 0.1 equiv) and 2,2'-bipyridine (7.8 mg, 0.05 mmol, 0.10 equiv) in 1.0 mL of CH<sub>2</sub>Cl<sub>2</sub>. The reaction was quenched after a period of 6 h. Flash column chromatography (after Kuglerrohr distillation) with 5-20% EtOAc in hexanes solvent mixture as the eluent afforded 140 mg (74%) of a product mixture consisting of regioisomers **18a** and **18b** (**18a**:**18b** = 73:27) as pale brown oil.

**18a**: <sup>1</sup>H NMR (500 MHz, CDCl<sub>3</sub>) δ 8.77 (dd, *J* = 4.0, 1.5 Hz, 1H), 8.06 (s, 1H), 8.00 (d, *J* = 8.5 Hz, 1H), 7.63-7.33 (m, 5H), 7.30 (q, *J* = 4.2 Hz, 1H), 7.19 (s, 1H), 1.20 (septet, *J* = 7.5 Hz, 3H), 0.99 (d, *J* = 7.5 Hz, 18H)

**18b**: <sup>1</sup>H NMR (500 MHz, CDCl<sub>3</sub>) δ 8.82 (dd, *J* = 4.0, 1.5 Hz, 1H), 8.09-8.04 (m, 1H), 7.70 (s, 1H), 7.63-7.33 (m, 6H), 7.24 (q, *J* = 4.2 Hz, 1H), 1.28 (septet, *J* = 7.5 Hz, 3H) 1.00 (d, *J* = 7.0 Hz, 18H)

<sup>13</sup>C NMR (125 MHz, CDCl<sub>3</sub>) δ 154.9, 152.0, 150.3, 149.0, 148.4, 144.3, 138.4, 138.3, 135.8, 135.5, 134.1, 131.1, 129.8, 129.76, 129.74, 129.1, 128.5, 127.78, 127.76, 127.3, 127.2, 123.6, 121.0, 119.2, 115.1, 113.1, 17.78, 17.75, 12.81, 12.80

HRMS (ESI) calcd for C<sub>24</sub>H<sub>32</sub>NOSi<sup>+</sup> (M+H)<sup>+</sup>: 378.2248, Found: 378.2248

IR (film): 2945, 2867, 1479, 1458, 1436, 1329, 1229, 932, 882, 868, 767, 698 cm<sup>-1</sup>

R<sub>f</sub> 0.51-0.60 (1:3 ethyl acetate:hexanes)

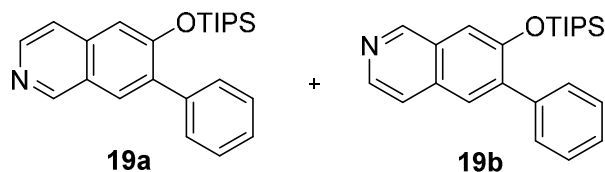

**(7-phenyl-6-isoquinolyloxy)-triisopropylsilane 19a and (6-phenyl-7-isoquinolyloxy)-triisopropylsilane 19b**

General procedure 1 was employed for the cycloaddition of pyrido[3,4-*d*]pyridazine **32** (65.6 mg, 0.5 mmol, 1.0 equiv) and 2-phenyl-1-(triisopropylsiloxy)ethyne **35** (275 mg, 1.0 mmol, 2.0 equiv) using a catalyst combination of tetrakis(acetonitrile)copper(I) hexafluorophosphate (18.6 mg, 0.05 mmol, 0.1 equiv) and 2,2'-bipyridine (7.8 mg, 0.05 mmol, 0.10 equiv) in 1.0 mL of CH<sub>2</sub>Cl<sub>2</sub>. The reaction was quenched after a period of 6 h. Flash chromatography (after Kuglerrohr distillation) with 5-20% ethyl acetate in hexanes solvent mixture as the eluent afforded 127 mg (67%) of a product mixture consisting of regioisomers **19a** and **19b** (**19a**:**19b** = 54:46) as pale yellow oil.

**19a**: <sup>1</sup>H NMR (500 MHz, CDCl<sub>3</sub>) δ 9.13 (s, 1H), 8.43 (d, *J* = 6.0 Hz, 1H), 7.87 (s, 1H), 7.57-7.53 (m, 2H), 7.50 (d, *J* = 6.0 Hz), 7.45-7.41 (m, 2H), 7.39-7.35 (m, 1H), 7.17 (s, 1H), 1.32-1.20 (m, 3H), 0.99 (d, *J* = 7.5 Hz, 18H)

**19b**: <sup>1</sup>H NMR (500 MHz, CDCl<sub>3</sub>) δ 9.11 (s, 1H), 8.41 (d, *J* = 5.0 Hz, 1H), 7.74 (s, 1H), 7.58 (d, *J* = 5.5 Hz, 1H), 7.57-7.53 (m, 2H), 7.45-7.41 (m, 2H), 7.40-7.35 (m, 1H), 7.32 (s, 1H), 7.31-7.19 (m, 3H), 0.99 (d, *J* = 7.5 Hz, 18H)

<sup>13</sup>C NMR (125 MHz, CDCl<sub>3</sub>) δ 155.5, 152.7, 151.8, 150.6, 143.0, 141.4, 139.7, 138.11, 138.09, 136.7, 136.5, 131.2, 129.7, 129.6, 128.4, 127.83, 127.82, 127.5, 127.3, 112.9, 112.0, 17.74, 17.72, 12.8 (2C)

HRMS (ESI) calcd for C<sub>24</sub>H<sub>32</sub>NOSi<sup>+</sup> (M+H)<sup>+</sup>: 378.2248, Found: 378.2245

IR (film): 2943, 2866, 1625, 1487, 1459, 1413, 1263, 1216, 1206, 883, 854, 697, 687, 644 cm<sup>-1</sup>

R<sub>f</sub> 0.20-0.30 (1:3 ethyl acetate:hexanes)

### Copper-Catalyzed Formal [2+2] Cycloaddition Reaction of Siloxy Alkynes and Cyclohexenone

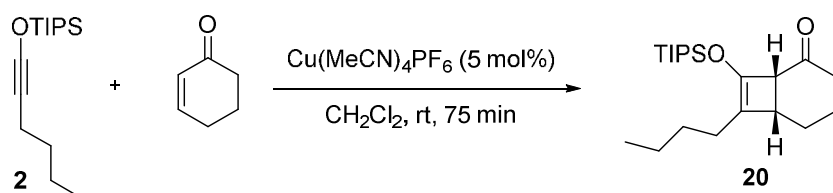

An oven-dried test-tube fitted with a septum was charged with 1-(triisopropylsiloxy)-1-hexyne **2** (153.0 mg, 0.6 mmol, 1.2 equiv) and 3.0 mL of anhydrous CH<sub>2</sub>Cl<sub>2</sub> in an inert atmosphere. Neat cyclohexenone (48 μL, 0.5 mmol, 1.0 equiv) was added followed by the addition of Cu(MeCN)<sub>4</sub>PF<sub>6</sub> (9.3 mg, 0.025 mmol, 0.05 equiv) dissolved in 1.0 mL of CH<sub>2</sub>Cl<sub>2</sub> (using a stock solution). The resulting clear light yellow solution is stirred at room temperature under nitrogen for 75 minutes. The mixture was then passed through a plug of silica and washed with CH<sub>2</sub>Cl<sub>2</sub> in order to remove the catalyst. The mixture was purified by flash column chromatography (after Kuglerrohr distillation),

using 2-5% ethyl acetate in hexanes solvent mixture as eluent to afford the 130 mg (74%) of the product **20** as colorless oil. Spectral data is consistent with that reported earlier.<sup>6</sup>

**20:** <sup>1</sup>H NMR (500 MHz, CDCl<sub>3</sub>) δ 3.38 (s, 1H), 2.81 (s, 1H), 2.56-2.50 (m, 1H), 2.14-2.09 (m, 2H), 1.92-1.86 (m, 3H), 1.68-1.61 (m, 1H), 1.59-1.54 (m, 1H), 1.43-1.31 (m, 4H), 1.15-1.10 (m, 3H), 1.08 (d, *J* = 7.0 Hz, 18H), 0.91 (t, *J* = 7.0 Hz, 3H)

<sup>13</sup>C NMR (125 MHz, CDCl<sub>3</sub>) 211.5, 138.3, 122.1, 58.0, 40.1, 34.8, 29.6, 25.1, 24.8, 23.3, 18.1, 17.9, 14.2, 13.0

**HRMS** (ESI) calcd for C<sub>21</sub>H<sub>39</sub>O<sub>2</sub>Si<sup>+</sup> (M+H)<sup>+</sup>: 351.2714, Found: 351.2708

**IR** (film): 2943, 2868, 1699, 1465, 1283, 1255, 1001, 884, 687, 668 cm<sup>-1</sup>

**R<sub>f</sub>** ~ 0.4 (15:85 ethyl acetate:hexanes)

### Evaluation of Other Metal Catalysts

Apart from the Ag(I), Cu(I) and Ni(0) complexes discussed, various other metal salts were evaluated for their ability to catalyze the formal [4+2] cycloaddition reaction. For every equivalent of phthalazine, 1.5 equivalents of 1-siloxyhexyne along with a 10 mol % loading of the metal salt were employed. The following yields were determined by <sup>1</sup>H NMR using 1,3,5-trimethoxybenzene as an internal standard. Though the hydrate of Mn(OAc)<sub>3</sub> catalyzed the reaction, the reaction was slower and lower yielding than the isoelectronic Cu(I) and Ni(0) complexes, and was hence not pursued further.

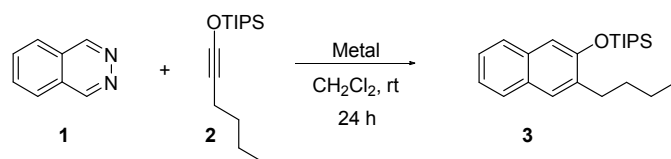

| Metal Salt                                           | Yield (%) |
|------------------------------------------------------|-----------|
| Sc(OTf) <sub>3</sub>                                 | 3         |
| MnBr <sub>2</sub>                                    | 0         |
| Mn(OAc) <sub>3</sub> ·2H <sub>2</sub> O              | 62        |
| FeCl <sub>2</sub>                                    | 0         |
| FeCl <sub>3</sub>                                    | 0         |
| Co(BF <sub>4</sub> ) <sub>2</sub> ·6H <sub>2</sub> O | 0         |
| NiCl <sub>2</sub>                                    | 0         |
| ZnBr <sub>2</sub>                                    | 0         |
| CdCl <sub>2</sub> ·2H <sub>2</sub> O                 | 0         |
| CrCl <sub>2</sub>                                    | 4         |
| CrCl <sub>3</sub>                                    | 0         |
| LiBr                                                 | 0         |

<sup>6</sup> Sweis, R. F.; Schramm, M. P.; Kozmin, S. A. *J. Am. Chem. Soc.* **2004**, *126*, 7442.

|                                       |   |
|---------------------------------------|---|
| CeCl <sub>3</sub>                     | 0 |
| Yb(OTf) <sub>3</sub>                  | 0 |
| La(OTf) <sub>3</sub>                  | 0 |
| ZrCl <sub>4</sub> ·(THF) <sub>2</sub> | 0 |
| In(OTf) <sub>3</sub>                  | 0 |
| Bi(OTf) <sub>3</sub>                  | 0 |

### Evaluation of Cu(II) salts and changing the nucleophilicity of the anion:

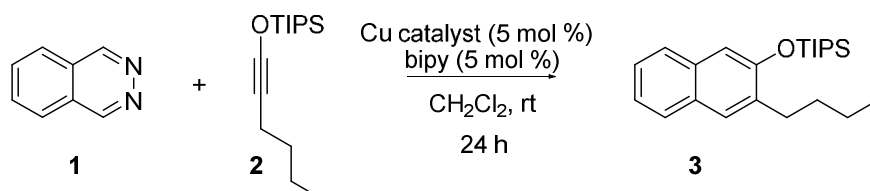

| Catalyst (mol %)                                 | Yield |
|--------------------------------------------------|-------|
| CuOTf (5)                                        | 34%   |
| Cu(1,10-phenanthroline)(PPh <sub>3</sub> )Br (5) | NR    |
| CuI (5)                                          | NR    |
| CuBr·(CH <sub>3</sub> ) <sub>2</sub> S (5)       | NR    |
| CuCl (5)                                         | 5%    |
| Cu(OTf) <sub>2</sub> (5)                         | 16%   |
| Cu(hexafluoroacetylacetonate) <sub>2</sub> (5)   | 4%    |
| Cu(MeCN) <sub>4</sub> OTf (5)                    | 38%   |
| Cu(MeCN) <sub>4</sub> PF <sub>6</sub> (5)        | 49%   |

### Evaluation of Other Azadienes

The following azadienes (**36-40**) reported in literature were evaluated with Cu(I) and Ni(0) based methodology developed in this publication. However, no conversion to the corresponding addition product was observed.

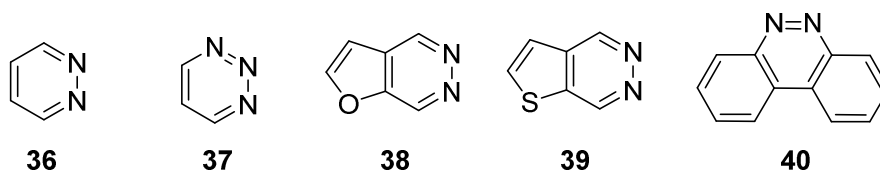

Potential diazine precursor to *N*-methyl indole **41** could be prepared by employing a modification of the methodology developed by Wagner and co-workers.<sup>1</sup> However, this highly polar diazine was only sparingly soluble in CH<sub>2</sub>Cl<sub>2</sub>. This limited its use with the methodology described in this publication. (Also, note that the reaction of **41** and siloxy alkyne **2** in CH<sub>2</sub>Cl<sub>2</sub> with DMSO as the co-solvent failed to afford any transformation with Cu(I).)

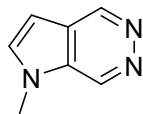

**41**

**$^1\text{H}$  and  $^{13}\text{C}$  NMR spectra**

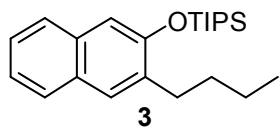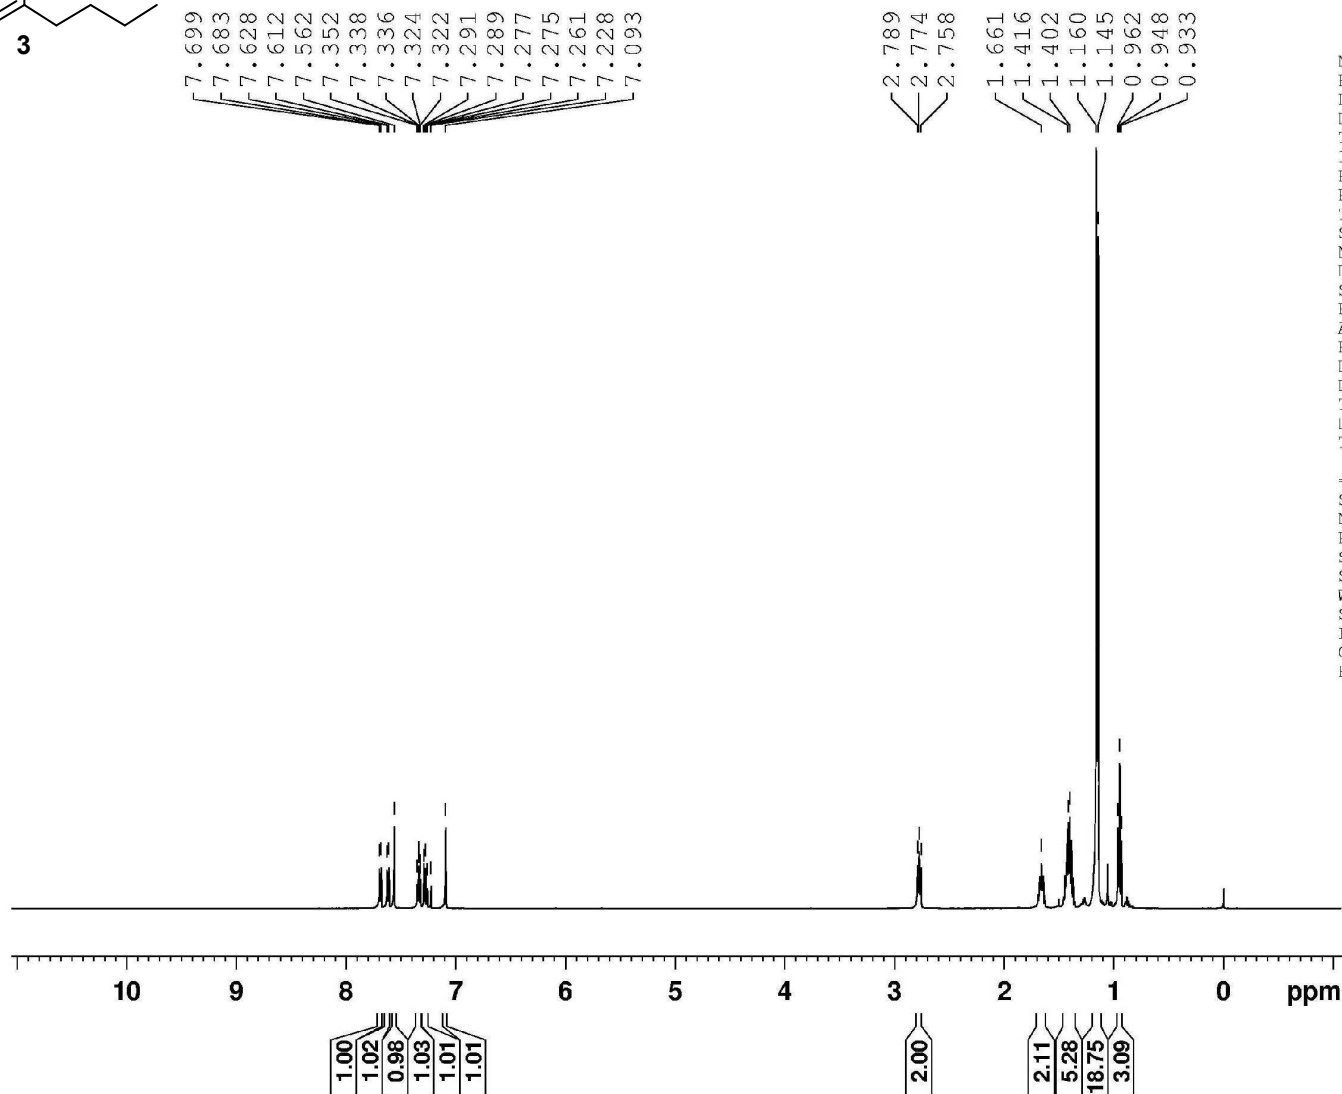

```

NAME          1.ccs.121.a2
EXPNO         1
PROCNO        1
Date_         20130522
Time          23.23
INSTRUM       spect
PROBHD        5 mm FATXI 1H/
PULPROG       zg
AQ            59998
SOLVENT       CDCl3
NS             12
DS             0
SWH           10000.000 Hz
FIDRES        0.166672 Hz
AQ            2.9999799 sec
RG            15.84
DW            50.000 usec
DE            10.00 usec
TE            294.1 K
D1            6.00000000 sec
TD0           1
  
```

```

===== CHANNEL f1 =====
SFO1          500.1330885 MHz
NUC1          1H
P1            8.00 usec
SI            65536
SF            500.1330289 MHz
WDW           r0
SSB           0
LB            0.00 Hz
GB            0
PC            1.00
  
```



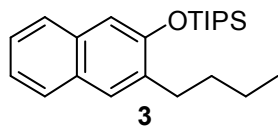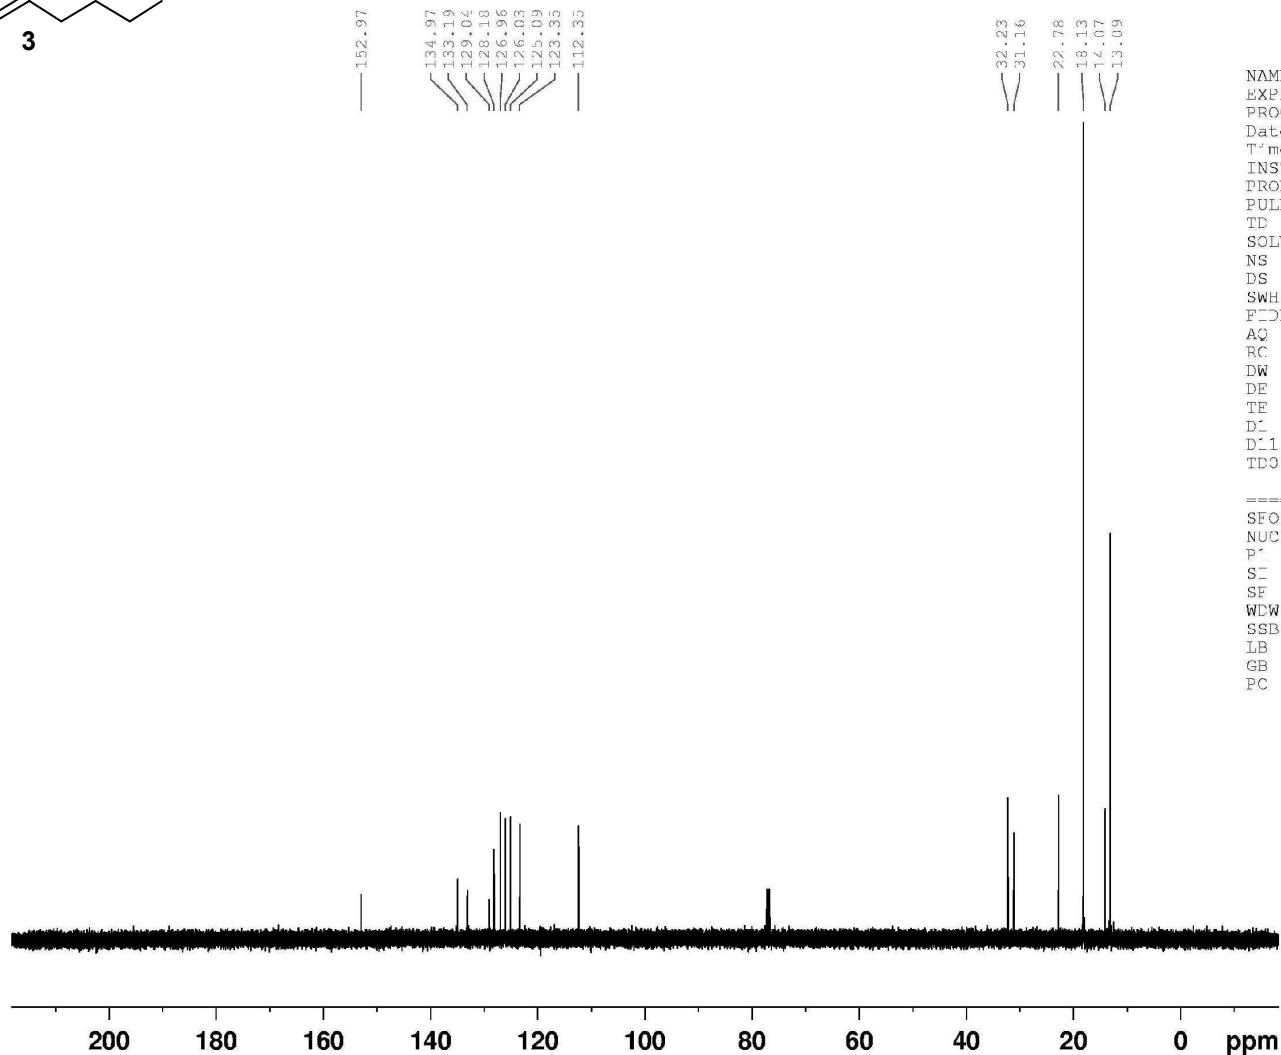

```

NAME      1.csb.121.a2.13C
EXPNO     1
PROCNO    1
Date_     20130522
Time      23.40
INSTRUM   spect
PROBED    5 mmr. DATXI 1H/
PULPROG   zgdc
TD        178568
SOLVENT   CDCl3
NS        120
DS        0
SWH       29761.904 Hz
FIDRES    0.166670 Hz
AQ        2.9999924 sec
RC        196.79
DW        16.800 usec
DE        10.00 usec
TE        295.3 K
D1        2.0000000 sec
D11       0.0300000 sec
TD0       1

```

```

===== CHANNEL f1 =====
SFO1     125.7703643 MHz
NUCL     13C
P1       14.00 usec
S1       131072
SF       125.7577953 MHz
WDW      no
SSB      0
LB       0.00 Hz
GB       0
PC       1.40

```

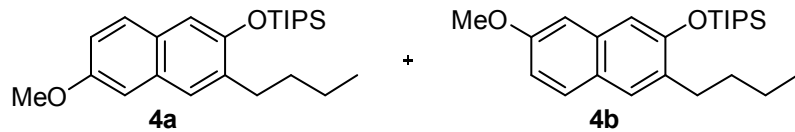

(General procedure 1)

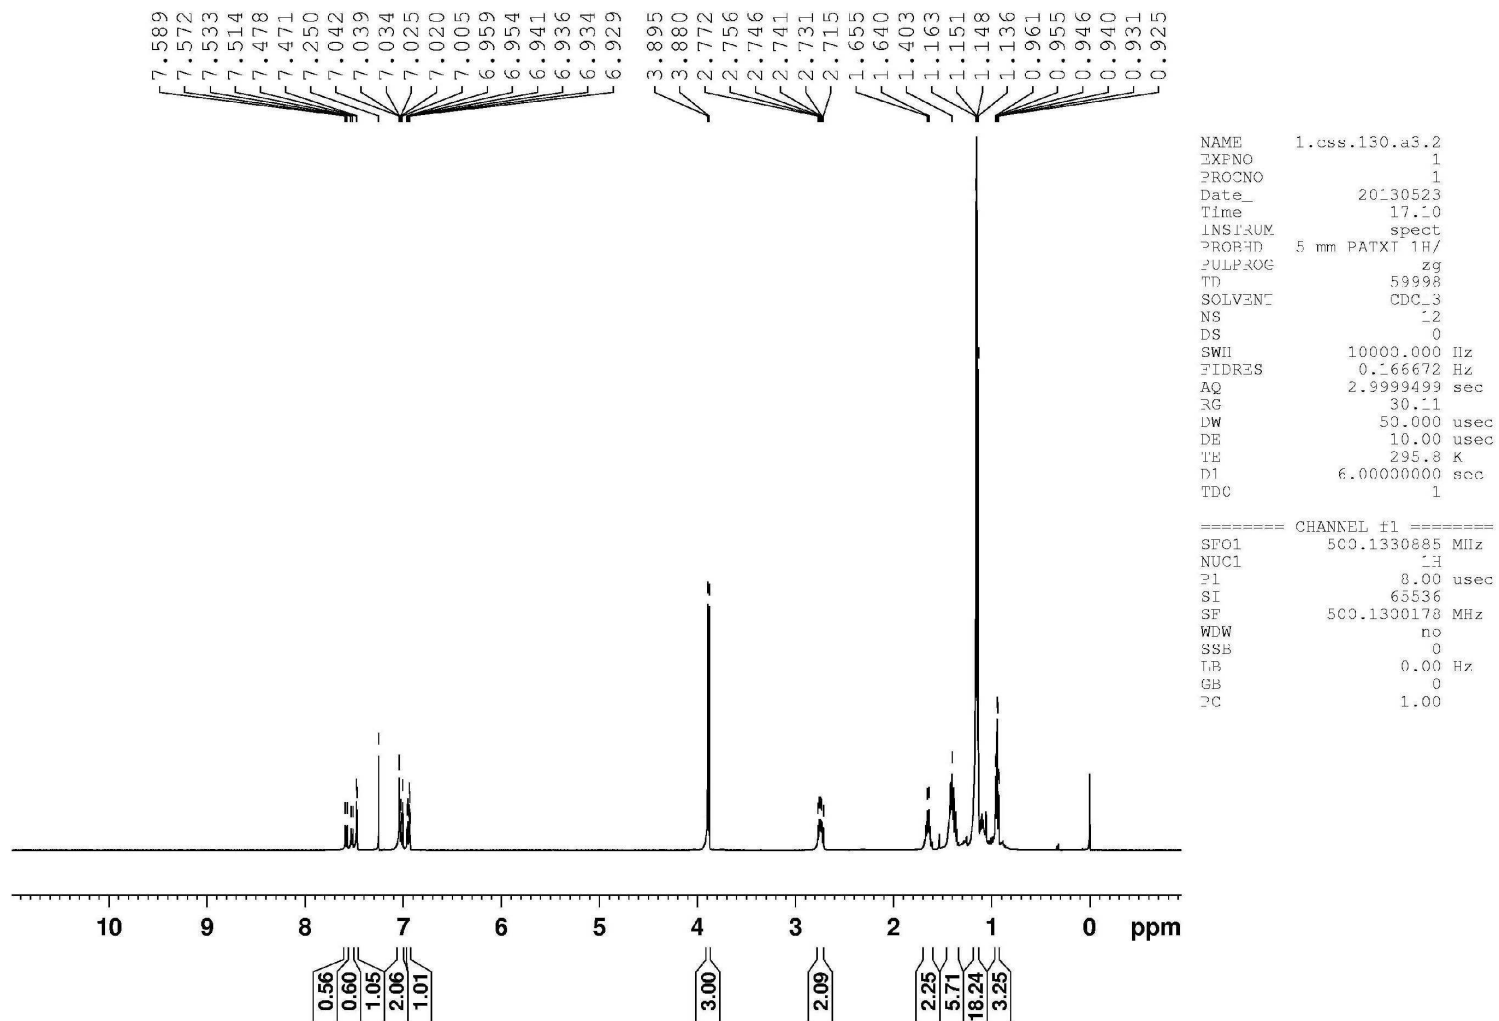

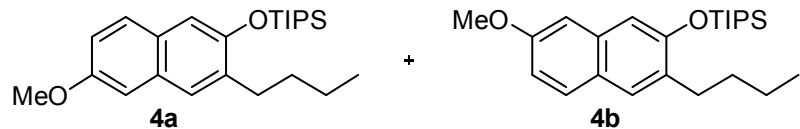

(General procedure 2)

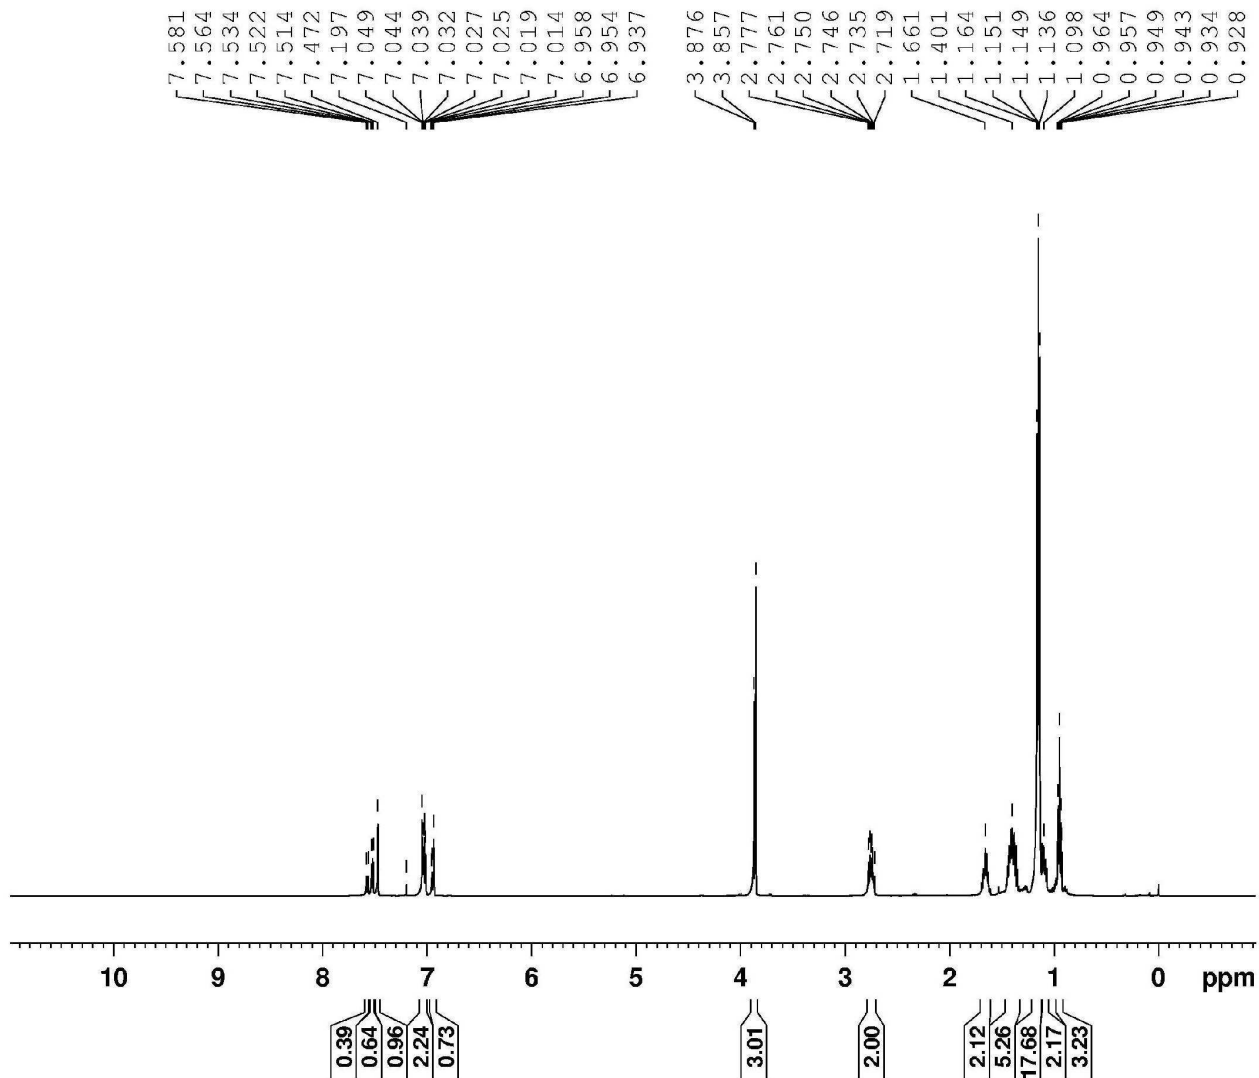

```

NAME      1.ccs.132.Ni.OMe
EXPNO     1
PROCNO    1
Date_     20130507
Time      19.26
INSTRUM   spect
PROBHD    5 mm. PATXI 1H/
PULPROG   zg
TD         59998
SOLVENT   CDCl3
NS         12
DS         0
SWH       10000.000 Hz
FIDRES    0.166672 Hz
AQ        2.9999499 sec
RG         6.92
DW         50.000 usec
DE         10.00 usec
TE         295.8 K
D1         5.0000000 sec
TD0        1
  
```

```

===== CHANNEL f1 =====
SFO1      500.1330885 MHz
NUC1       1H
P1         8.00 usec
SI         65536
SF         500.1300438 MHz
WDW        nc
SSB        C
LB         0.00 Hz
GB         C
PC         1.00
  
```

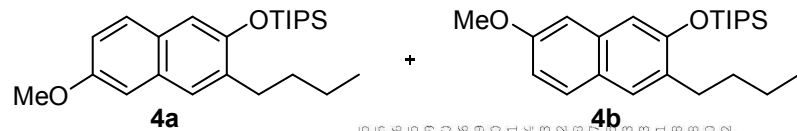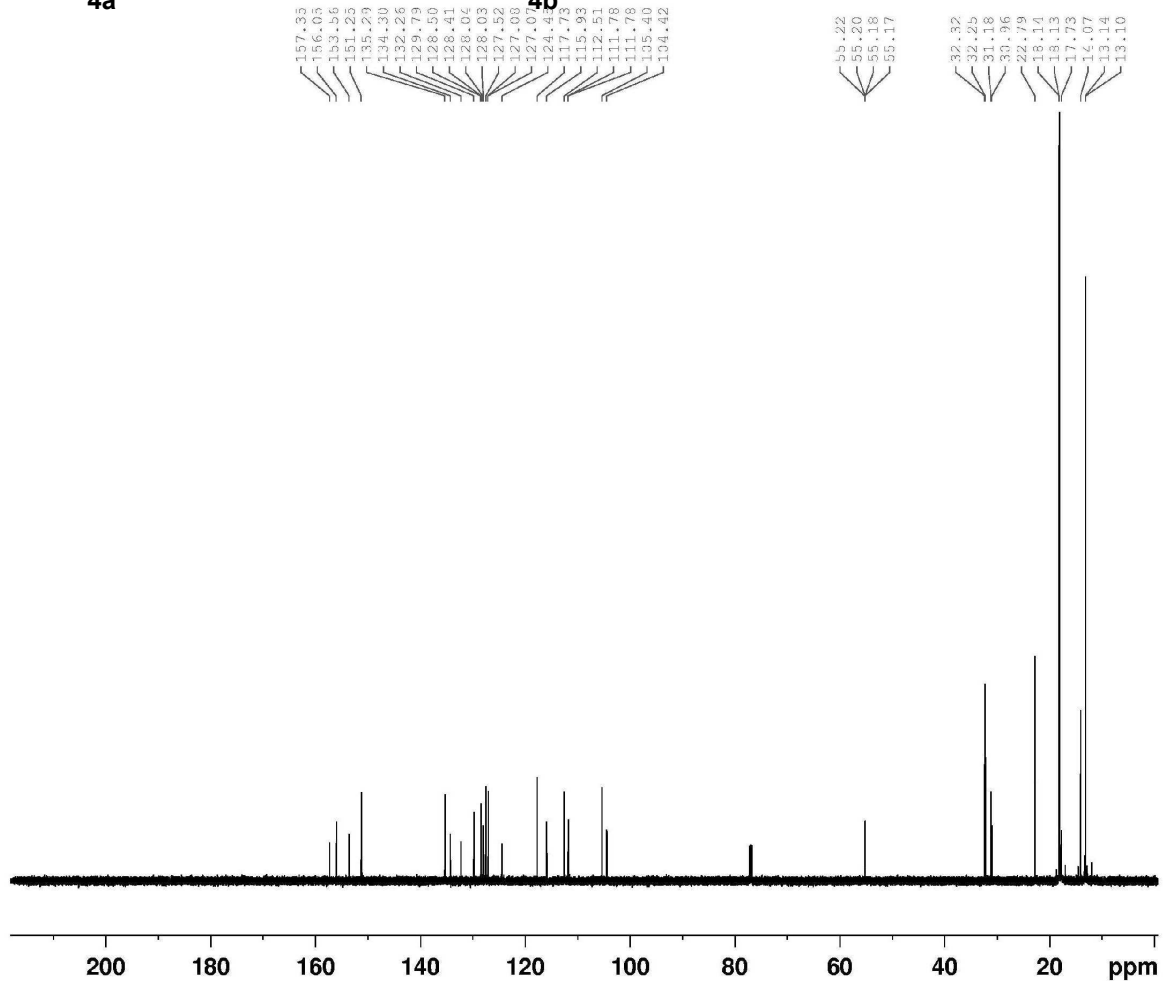

```

NAME      1.ccs.132.Ni.CMe.13C
EXPNO    1
PROCNO   1
Date_    20130507
Time     19.56
INSTRUM  spect
PROBHD   b mm PAXI 1E/
PULPROG  zgpg
TD        178568
SOLVENT  CDCl3
NS        250
DS        0
SWH       29761.904 Hz
FIDRES    0.166670 Hz
AQ        2.9999924 sec
RG         196.79
LW        16.800 usec
DE         10.00 usec
TE         297.2 K
D1         2.0000000 sec
D11        0.0300000 sec
LDD        1
===== CHANNEL f1 =====
SFO      125.7703643 MHz
NUC1      13C
P1        14.00 usec
SI        131072
SF        125.7577987 MHz
WDW        r0
SSB        0
LB         0.00 Hz
GB         0
PC         1.40
  
```

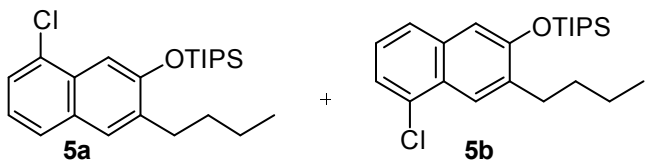

(General procedure 1)

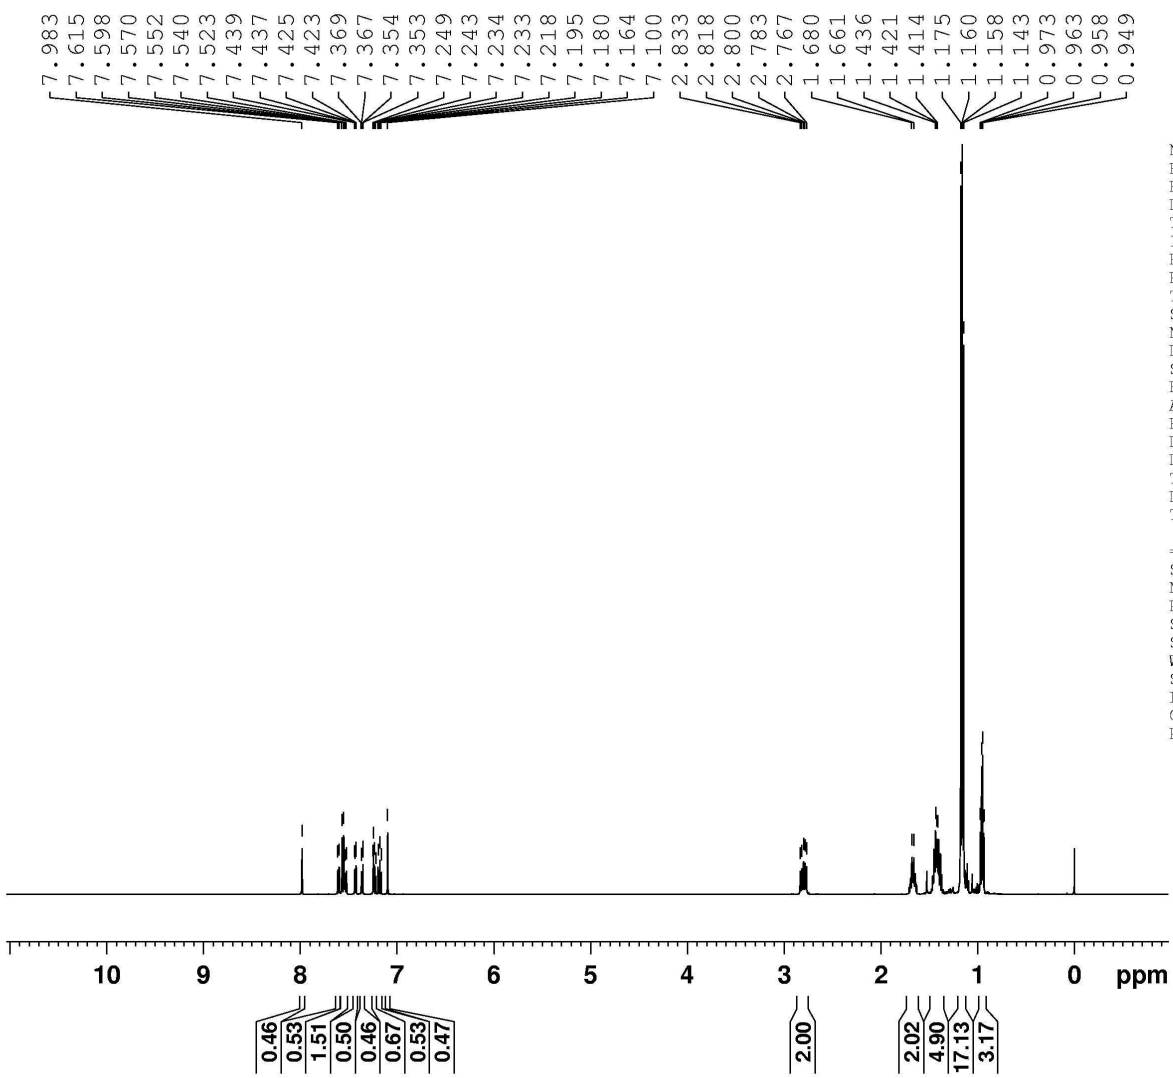

```

NAME          2.css.65.
EXPNO         1
PROCNO        1
Date_         20140428
Time          17.05
INSTRUM       spect
PROBHD        5 mm PABBO BB/
PULPROG       zg
TD             59998
SOLVENT       CDCl3
NS             8
DS             0
SWH           10000.000 Hz
FIDRES        0.166672 Hz
AQ            2.9999499 sec
RG            19.64
DW            50.000 usec
DE            6.50 usec
TE            297.0 K
D1            8.0000000 sec
TDO           1

===== CHANNEL f1 =====
SFO1          499.8730869 MHz
NUC1           1H
P1            10.75 usec
SI            65536
SF            499.8700203 MHz
WDW           no
SSB           0
LB            0.00 Hz
GB            0
PC            1.00
  
```

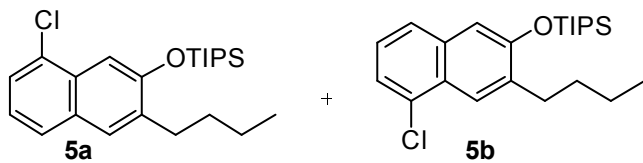

(General procedure 2)

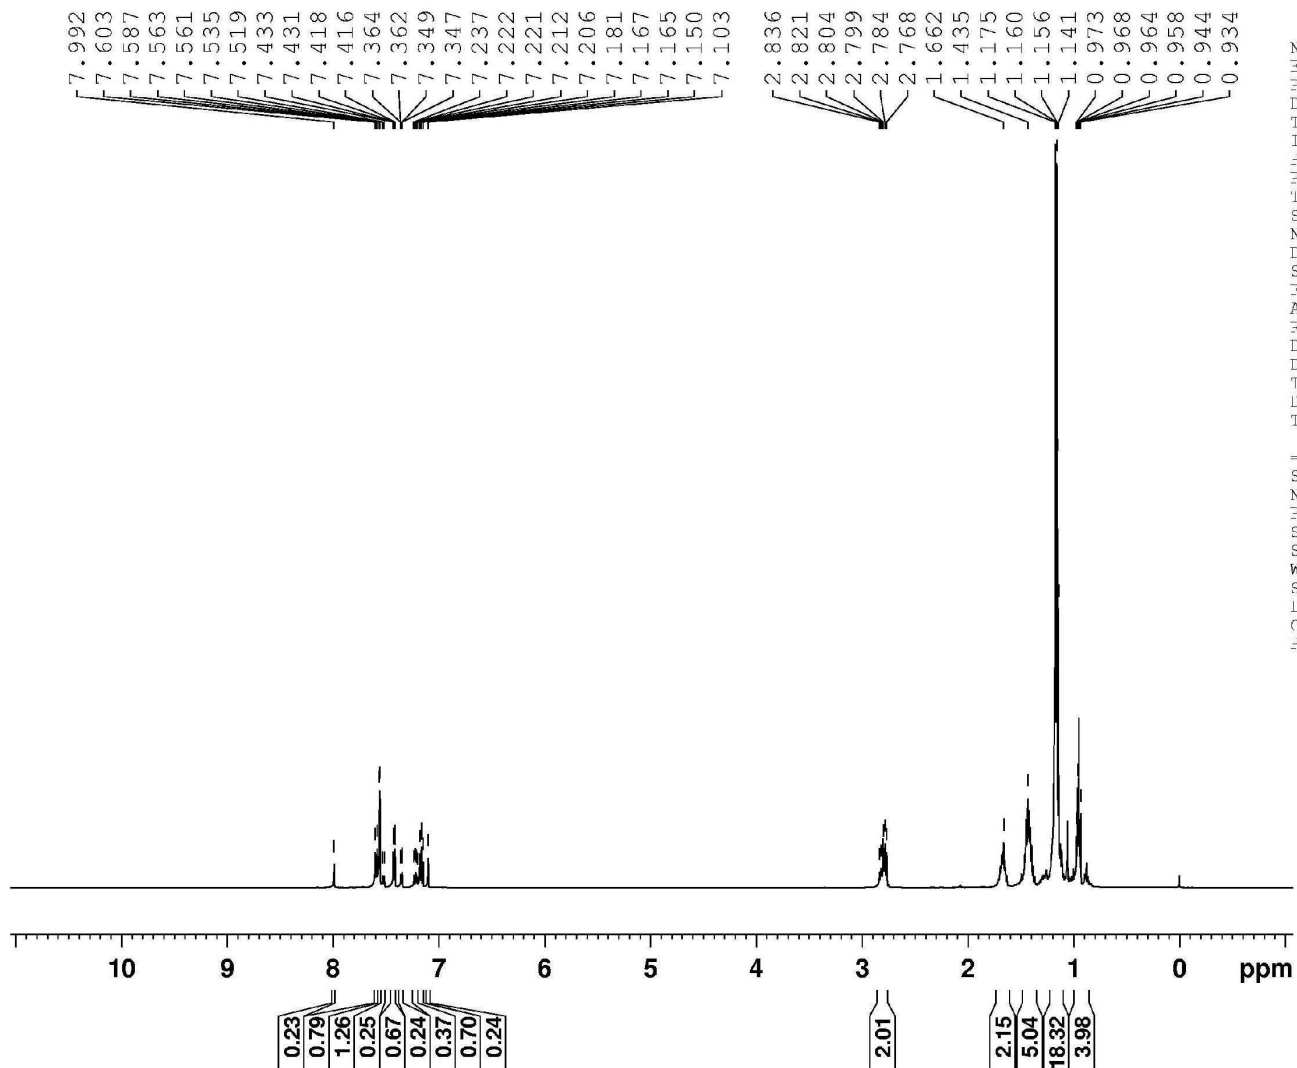

```

NAME      1.css.130.1H.Ni
EXPNO     1
PROCNO    1
Date_     20130506
Time      17.54
INSTRUM   spect
PROBHD    5 mm PAXI 1H/
PULPROG   zg
TD         59998
SOLVENT   CDCl3
NS         12
DS         0
SWH       10000.000 Hz
FIDRES    0.166672 Hz
AQ         2.9999499 sec
RG         11.29
DW         50.000 usec
DE         10.00 usec
TE         295.9 K
D1         5.00000000 sec
TDC        1
  
```

```

===== CHANNEL f1 =====
SFO1     500.1330885 MHz
NUC1      1H
P1        8.00 usec
SI        65536
SF        500.1300366 MHz
WDW       no
SSB       0
LB        0.00 Hz
GB        0
PC        1.00
  
```

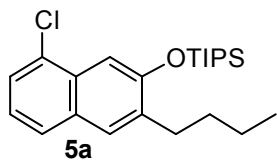

+

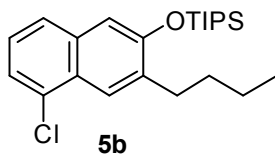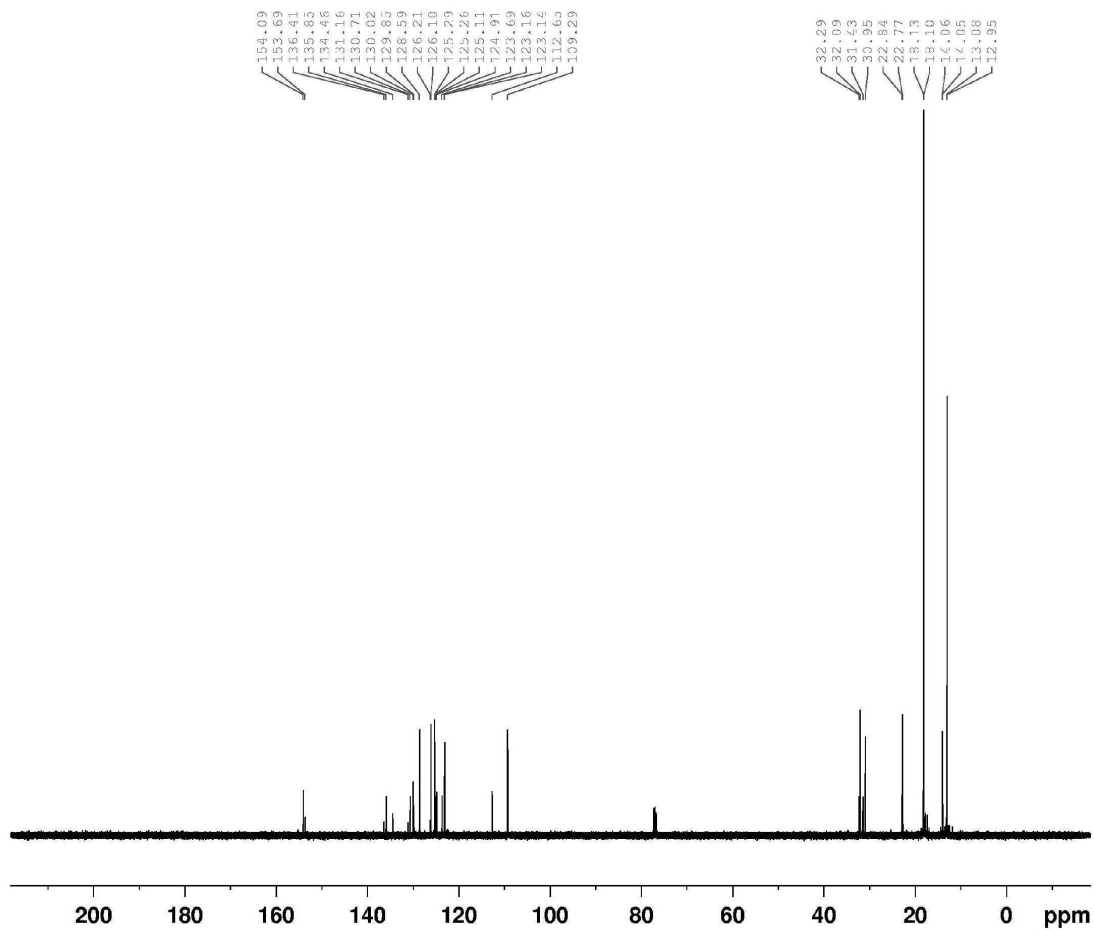

```

NAME      1.ccs.130.Ni.13C
EXPNO     1
PROCNO    1
Date_     20130506
Time      18.26
INSTRUM   spect
PROBHD    5 mm PATXI 1H/
PULPROG   zgpg
TD         178568
SOLVENT   CDCl3
NS         250
DS         0
SWH       29761.904 Hz
FIDRES    0.266670 Hz
AQ         2.9999924 sec
RG         196.79
DW         16.800 usec
DE         10.00 usec
TE         296.7 K
D1         2.0000000 sec
D11        0.0500000 sec
TDC        1

===== CHANNEL f1 =====
SFO1      125.7703643 MHz
NUC1       13C
P1         14.00 usec
SI         -31072
SF         125.7577958 MHz
WDW        no
SSB        0
LB         0.00 Hz
GB         0
PC         1.40
  
```

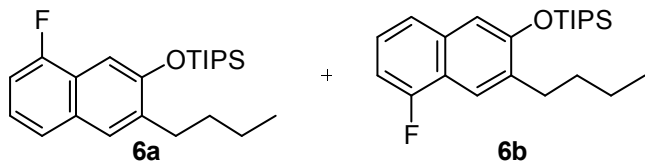

(General Procedure 1)

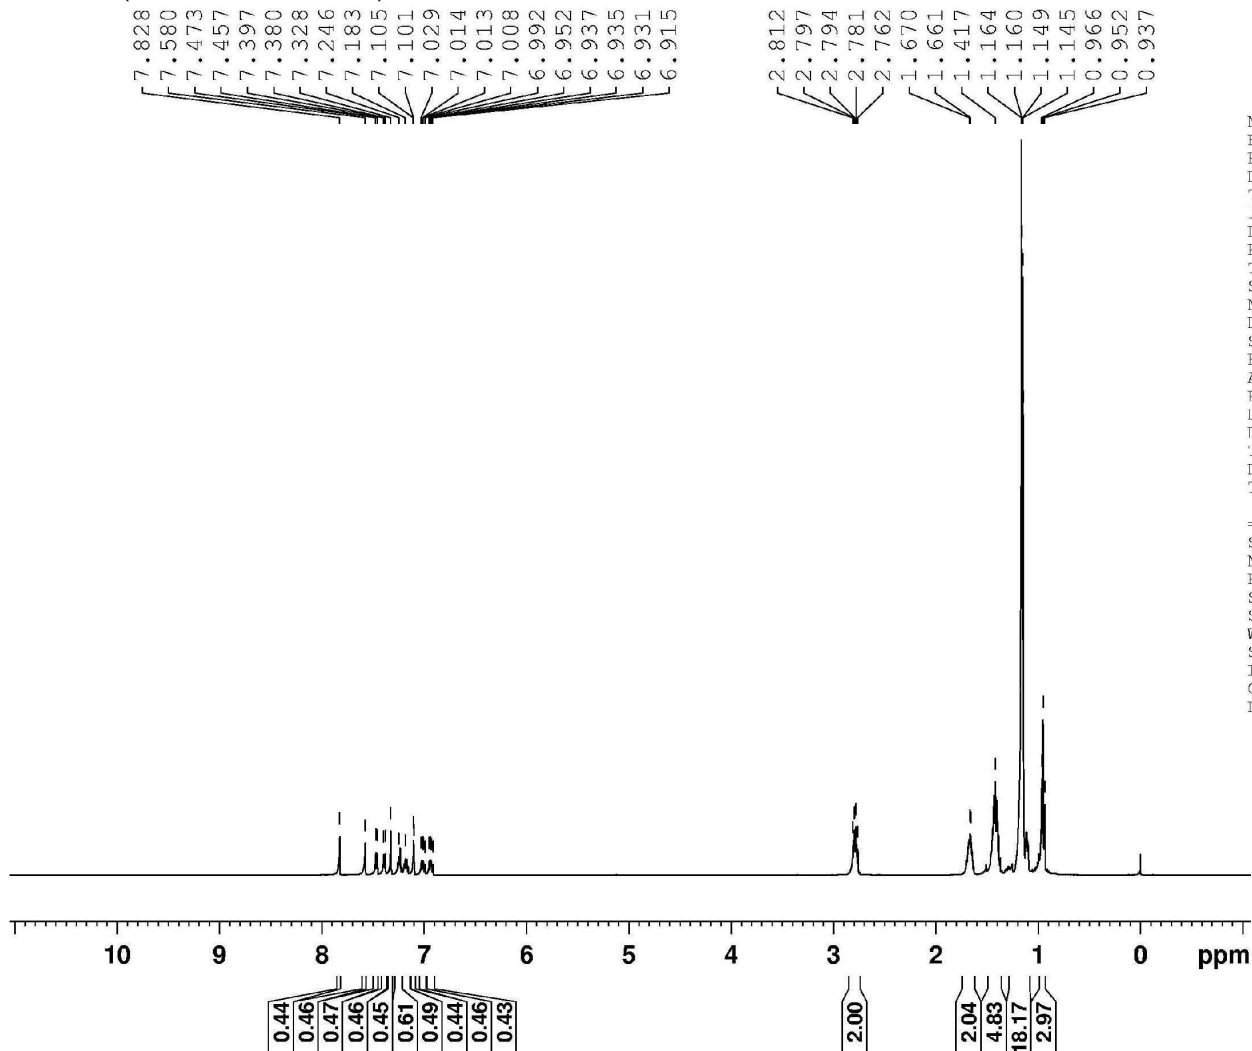

```

NAME      1.ccs.146.a2
EXPNO     1
PROCNO    1
Date_     20130613
Time      14.58
INSTRUM   spect
PROBHD    5 mm. PATXI 1H/
PULPROG   zg
TD         59998
SOLVENT   CDCl3
NS         12
DS         0
SWH       10000.000 Hz
FIDRES    0.166672 Hz
AQ         2.9999499 sec
RG         15.84
DW         50.000 usec
DE         10.00 usec
TE         297.6 K
D1         6.00000000 sec
TDO        1
  
```

```

===== CHANNEL f1 =====
SFO1     500.1330985 MHz
NUC1      1H
P1        8.00 usec
SI        65536
SF        500.1300256 MHz
WDW        nc
SSB        C
LB         0.00 Hz
GB         C
PC         1.00
  
```



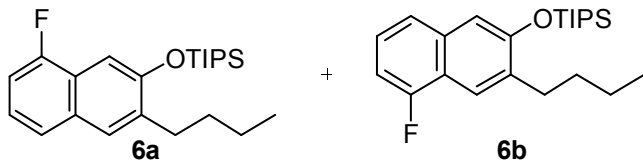

(General Procedure 2)

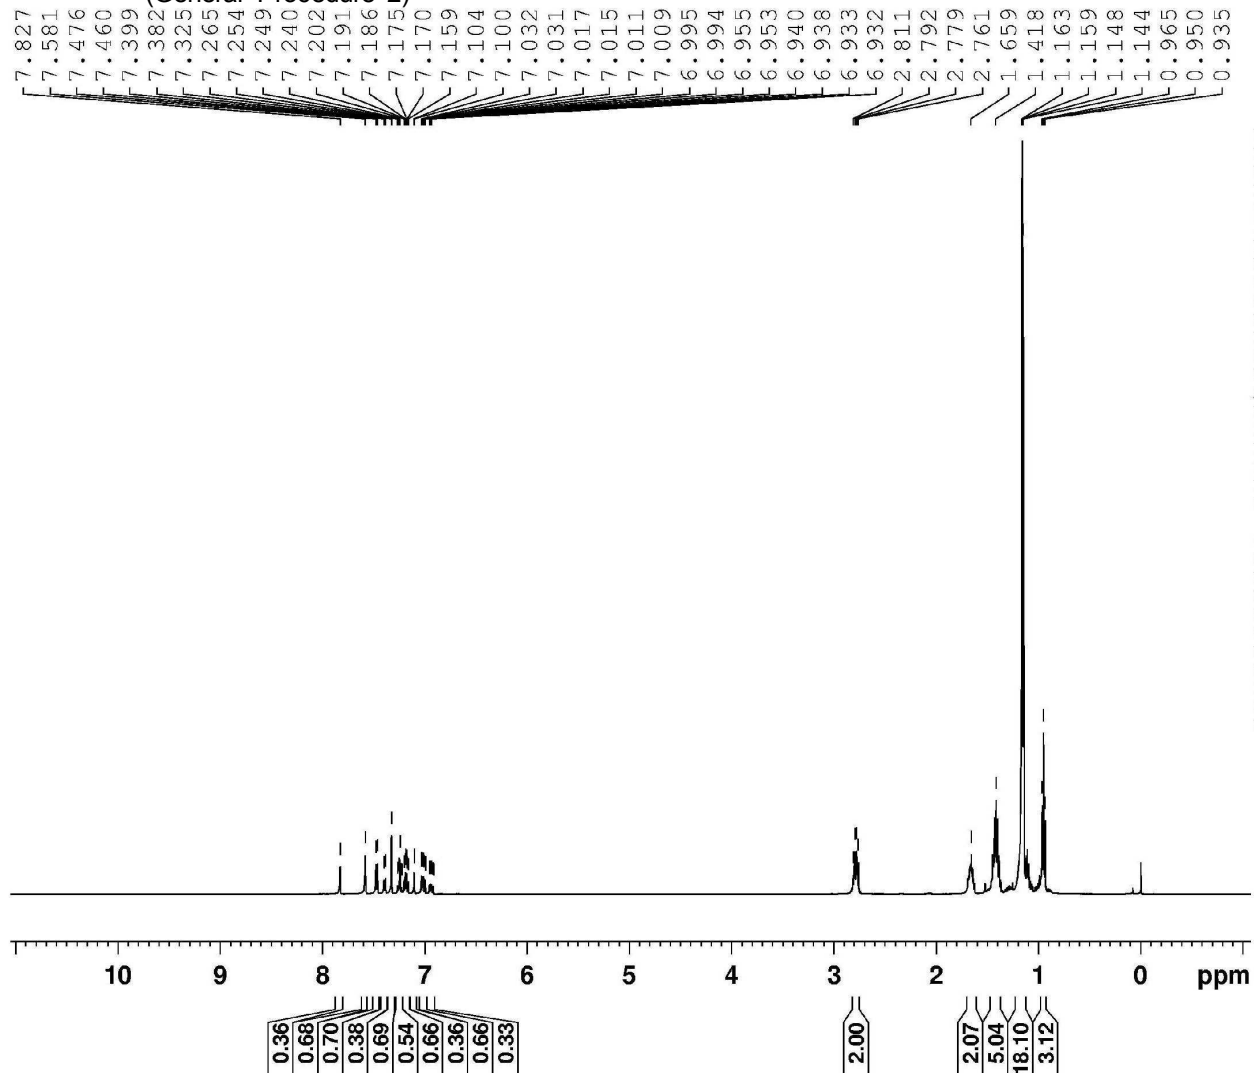

```

NAME          1.css.147
EXPNO         1
PROCNO        1
Date_         20130618
Time_         10.49
INSTRUM       spect
PROBHD        5 mm PATXI 1H/
PULPROG       zg
TD            59998
SOLVENT       CDC_3
NS            12
DS            0
SWH           10000.000 Hz
FIDRES        0.166672 Hz
AQ            2.9999499 sec
RG            15.84
DQ            50.000 usec
DE            10.00 usec
TE            294.5 K
D1            6.0000000 sec
TDC           1
  
```

```

===== CHANNEL #1 =====
SFO1          500.1330885 MHz
NUC1          1H
P1            8.00 usec
SI            65536
SF            500.1300235 MHz
WDW           no
SSB           0
LB            0.00 Hz
GB            0
PC            1.00
  
```

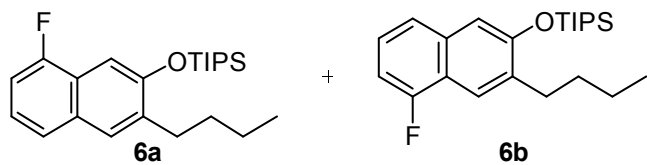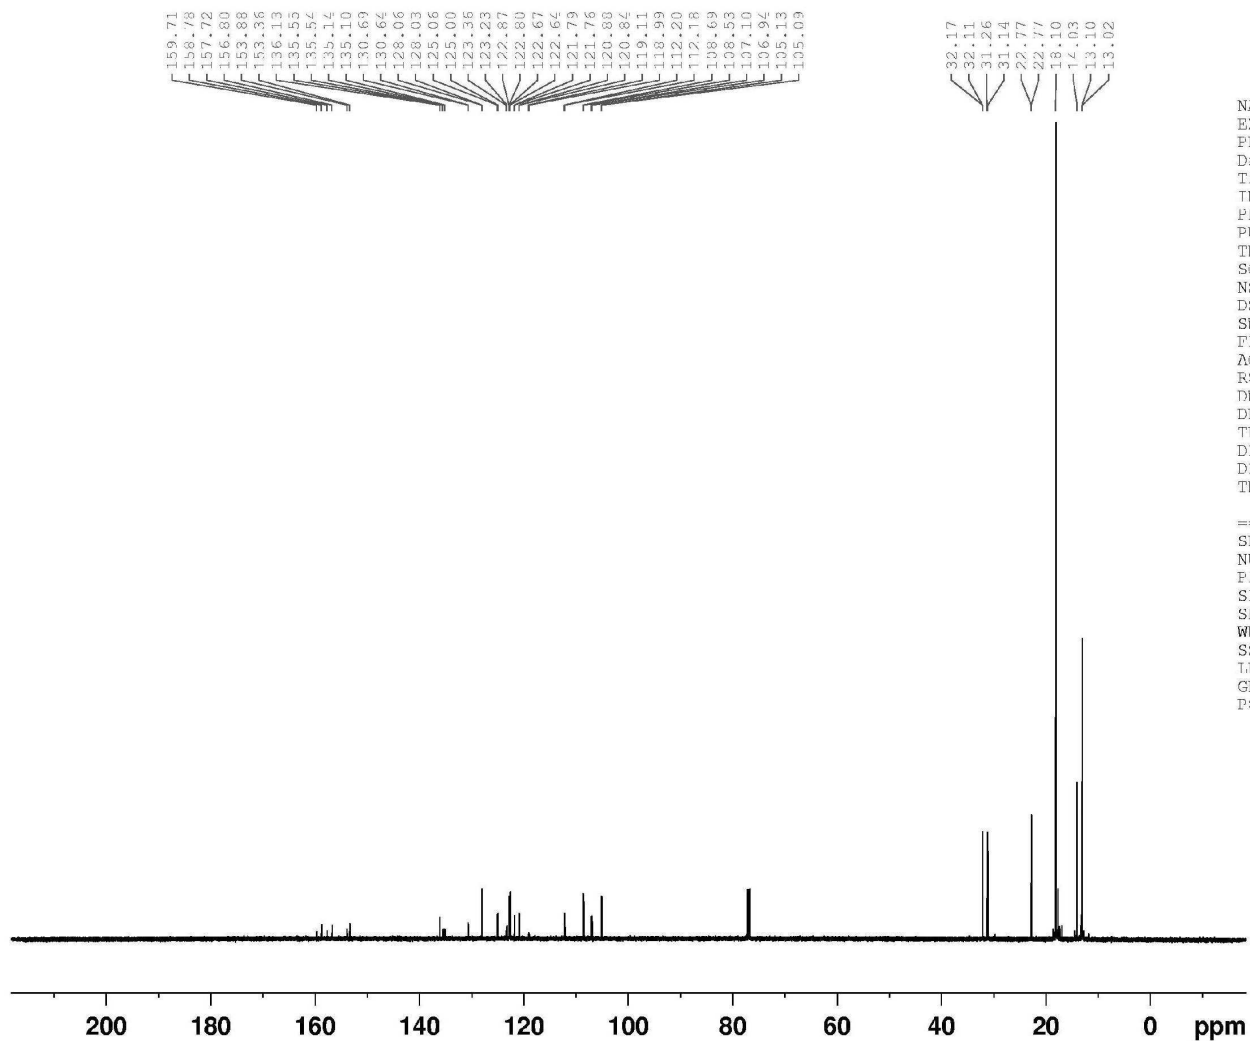

```

NAME      1.css.147.13C.2
EXPNO     1
PROCNO    1
Date_     20130623
Time      2.34
INSTRUM   spect
PROBHD    5 mm. PATXI 1H/
PULPROG   zgpg
TD         178568
SOLVENT   CDCl3
NS        3072
DS         0
SWH       29761.904 Hz
FIDRES    0.166670 Hz
AQ        2.9999924 sec
RG        196.79
DW        16.800 usec
DE        10.00 usec
TE        295.9 K
DL        2.0000000 sec
D11       0.0300000 sec
TDO       1
  
```

```

===== CHANNEL f1 =====
SF01     125.7703643 MHz
NUC1     13C
P1       14.00 usec
SI       132.072
SF       125.7577917 MHz
WDW      no
SSB      0
LR       0.00 Hz
GB       0
PC       1.40
  
```

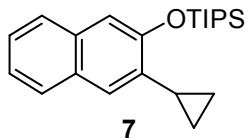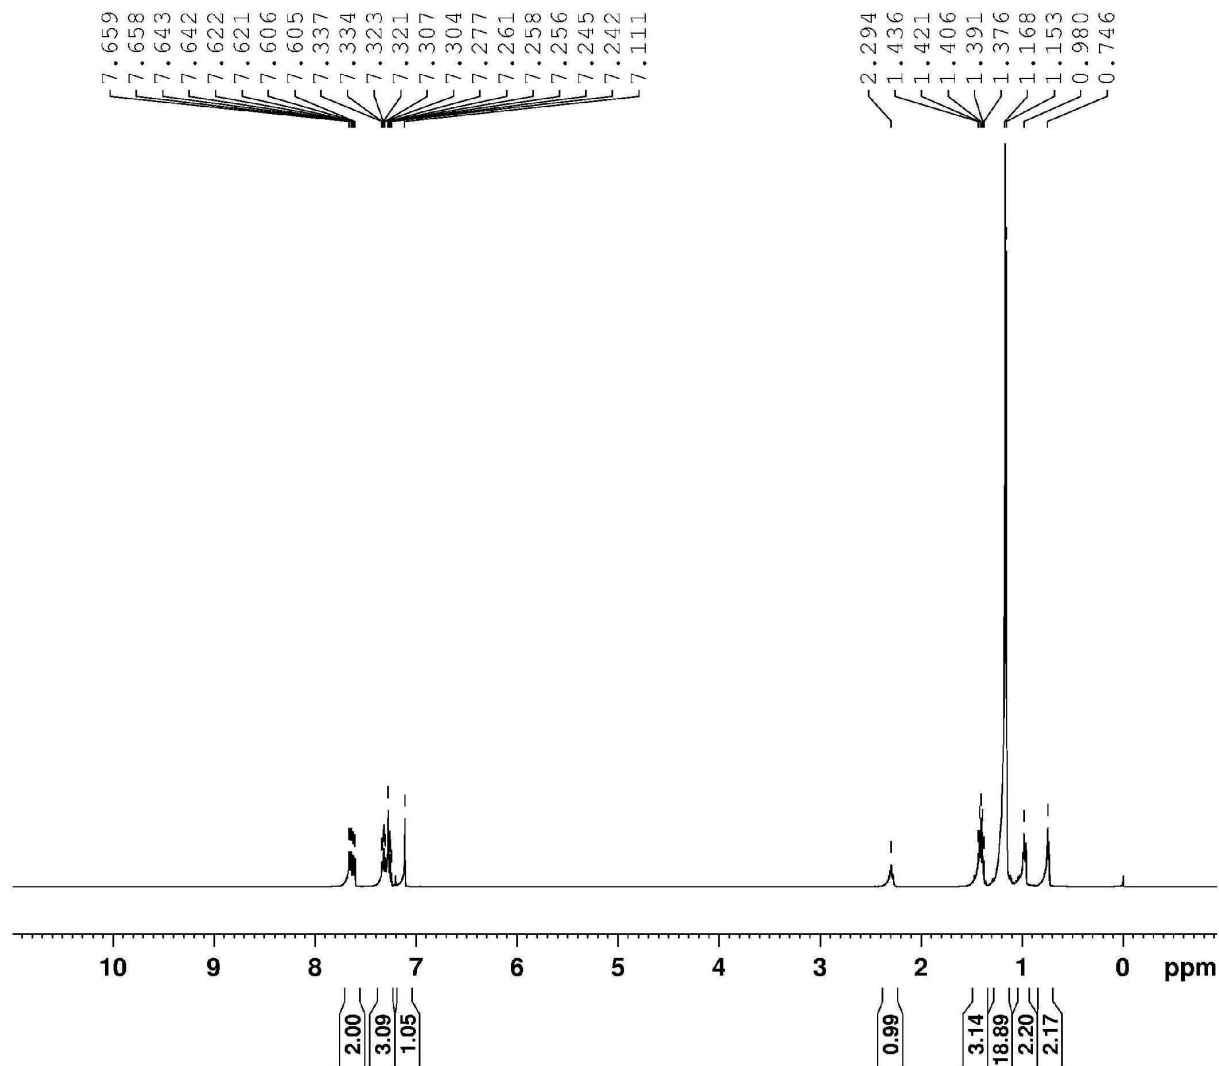

```

NAME          1.css.168
EXPNO         1
PROCNO        1
Date_         20130723
Time          17.52
INSTRUM       spect
PROBHD        5 mm PATXI 1H/
PULPROG       zg
TD            59998
SOLVENT       CDCl3
NS            12
DS            0
SWH           10000.000 Hz
FIDRES        0.166672 Hz
AQ            2.9999499 sec
RG            14.3
DW            50.000 usec
DE            10.00 usec
TE            294.8 K
D1            6.00000000 sec
TD0           1
  
```

```

----- CHANNEL #1 -----
SF01          500.1330885 MHz
NUC1          1H
P1            8.00 usec
ST            65536
SF            500.1330405 MHz
WDW           no
SSB           0
LB            0.00 Hz
GB            0
PC            1.00
  
```

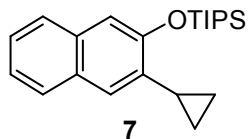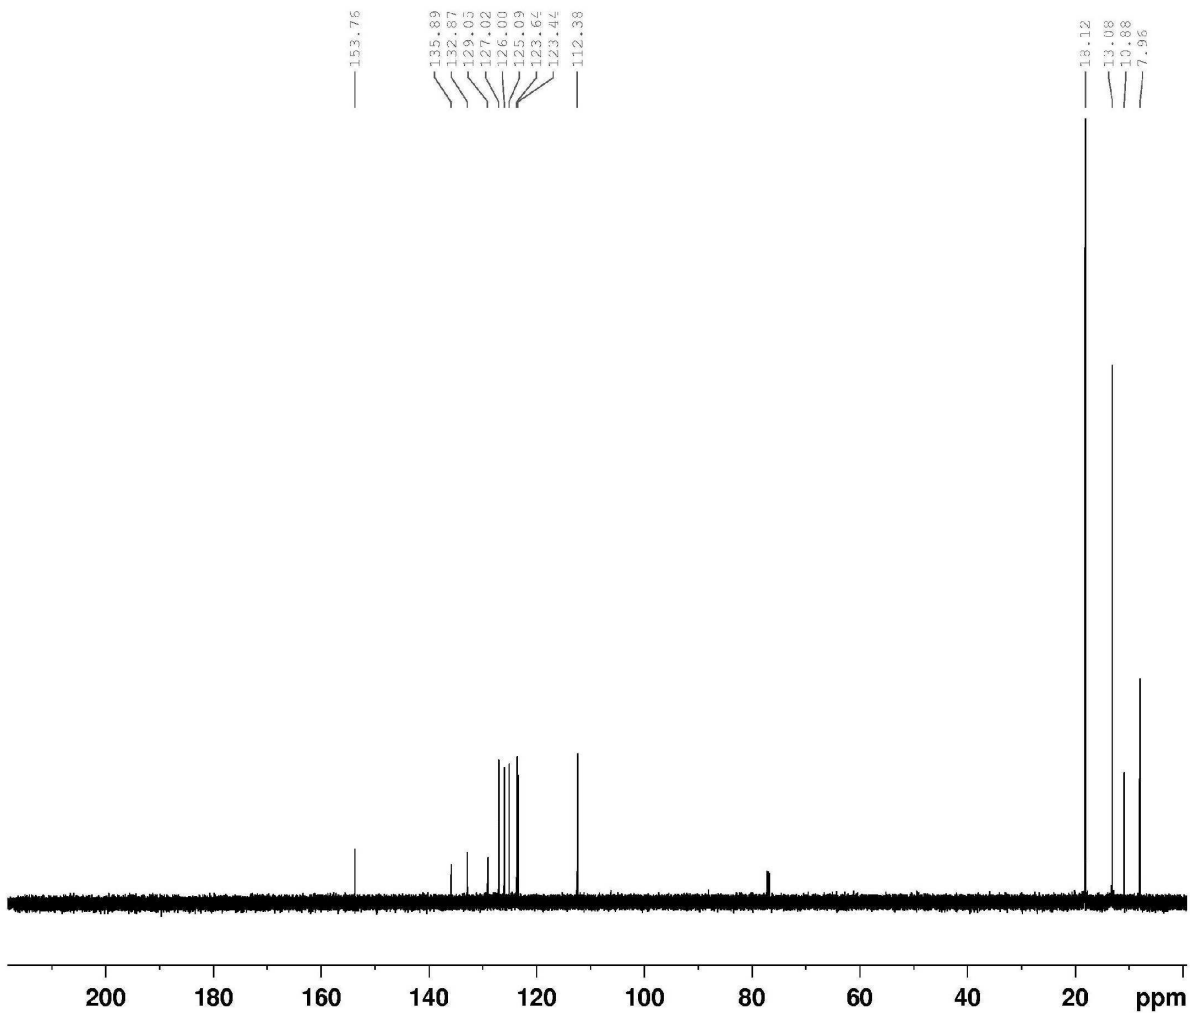

```

NAME          1.css.168.13C
EXPNO         1
PROCNO        1
Date_         20130723
Time         18.17
INSTRUM      spect
PROBHD       5 mm PATXI 1H/
PULPROG      zgdc
TD           178568
SOLVENT      CDCl3
NS           180
DS           0
SWH          29761.904 Hz
FIDRES       0.166670 Hz
AQ           2.9999924 sec
RG           96.79
DW           16.800 usec
DE           10.00 usec
TE           295.6 K
D1           2.0000000 sec
D11          0.0300000 sec
TDC          1

===== CHANNEL f1 =====
SFO1         125.7703643 MHz
NUC1         13C
P1           14.00 usec
SI           -31072
SF           125.7577973 MHz
WDW          no
SSB          0
LB           0.00 Hz
GB           0
PC           1.40

```

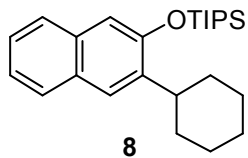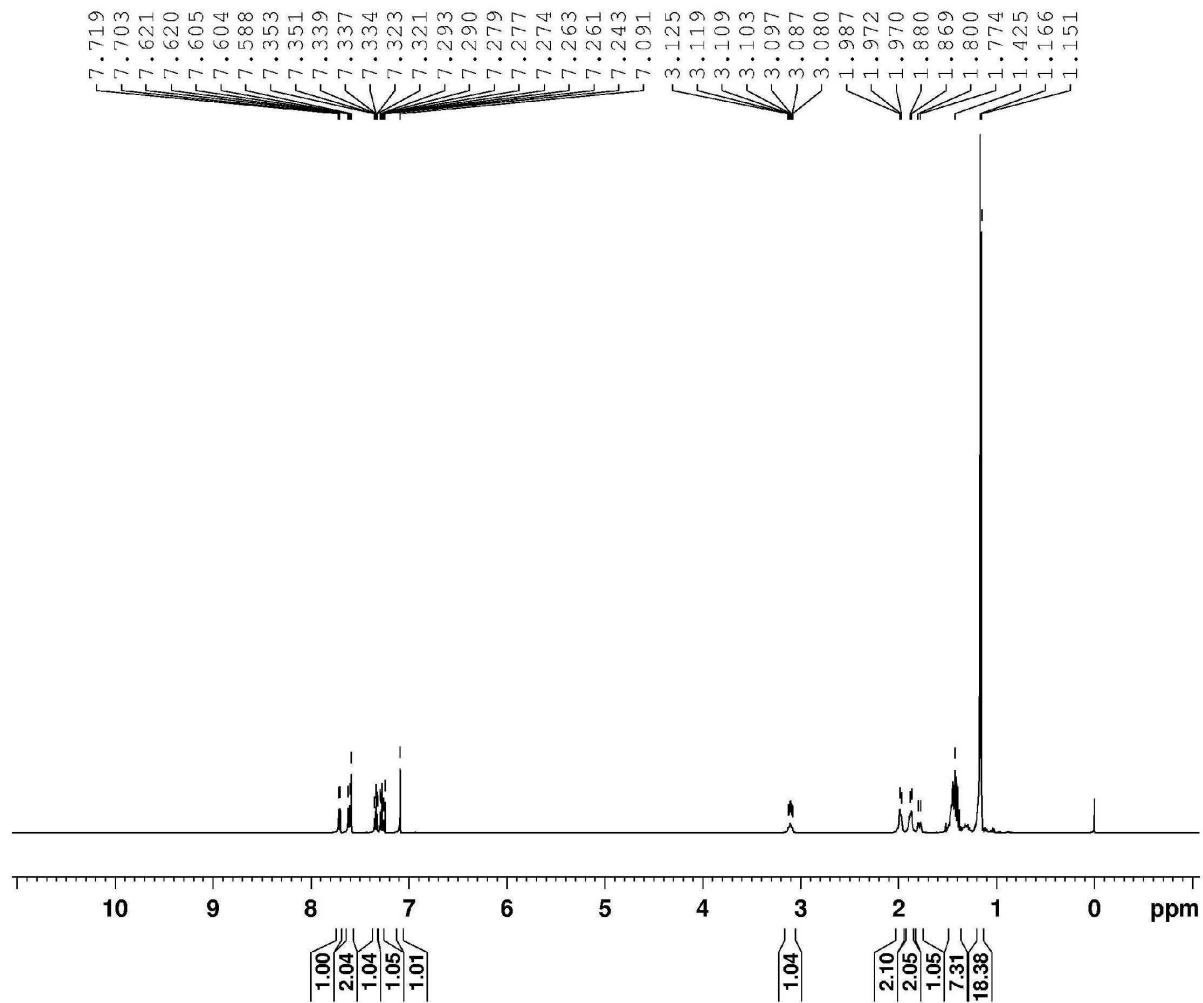

```

NAME          1.css.157
EXPNO         -
PROCNO        -
Date_         20130624
Time         14.23
INSTRUM       spect
PROBHD        5 mm PATXI 1H/
PULPROG       zg
TD            59998
SOLVENT       CDCl3
NS            12
DS            0
SWH           10000.000 Hz
FIDRES        0.166672 Hz
AQ            2.9999499 sec
RG            30.11
DW            50.000 usec
DE            10.00 usec
TE            294.9 K
D1            6.00000000 sec
D0            -
  
```

```

===== CHANNEL f1 =====
SF01          500.1330885 MHz
NUC1           1H
P1             8.00 usec
SI            65536
SF            500.1300217 MHz
WDW            rc
SSB            0
LB            0.00 Hz
GB            0
PC            1.00
  
```

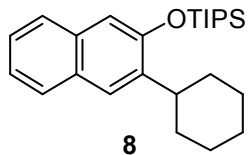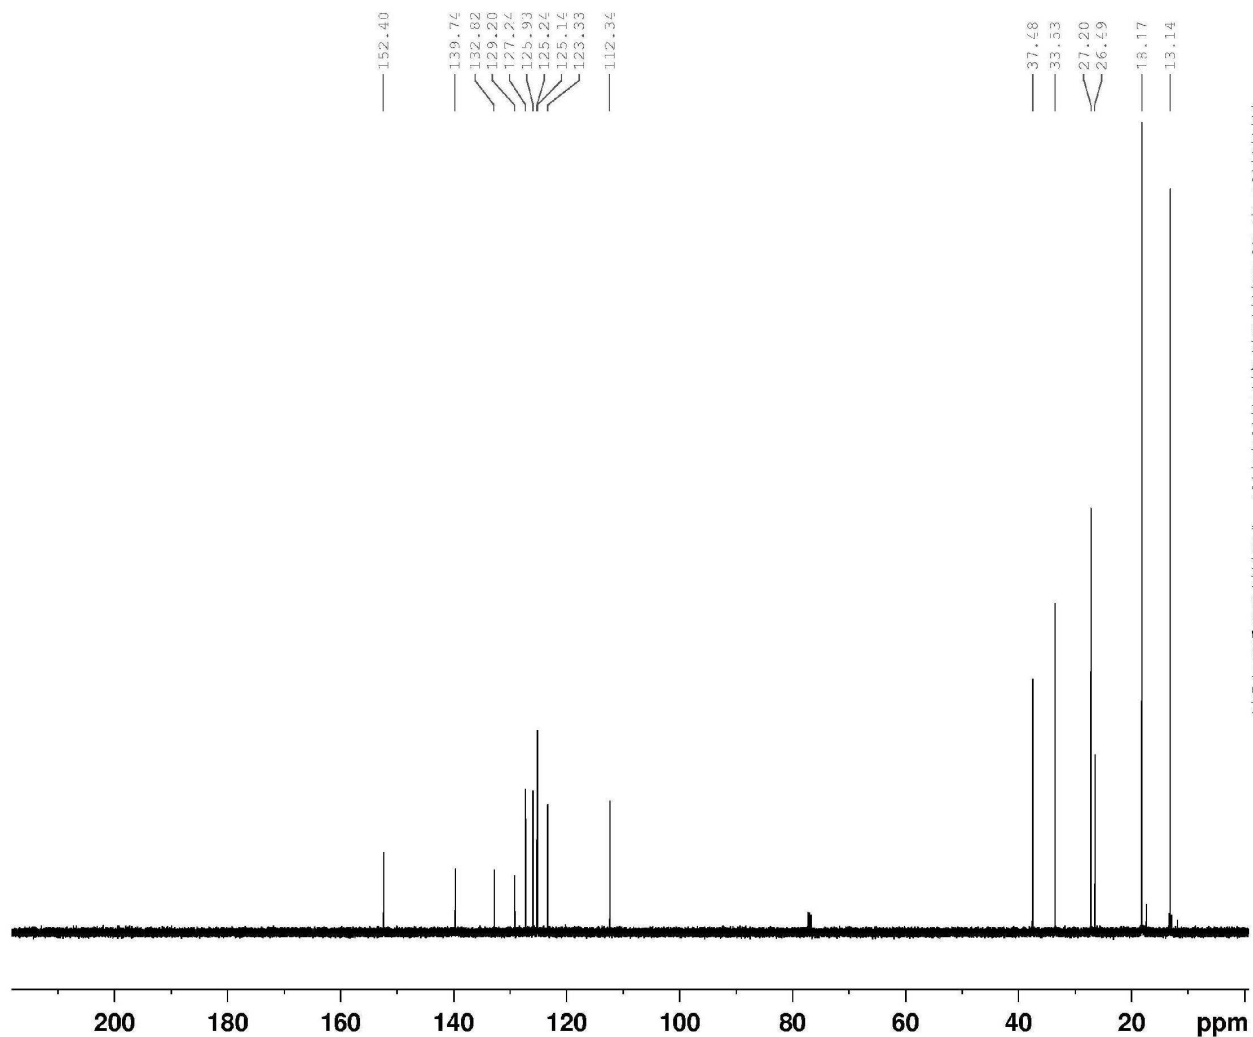

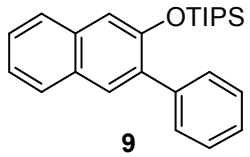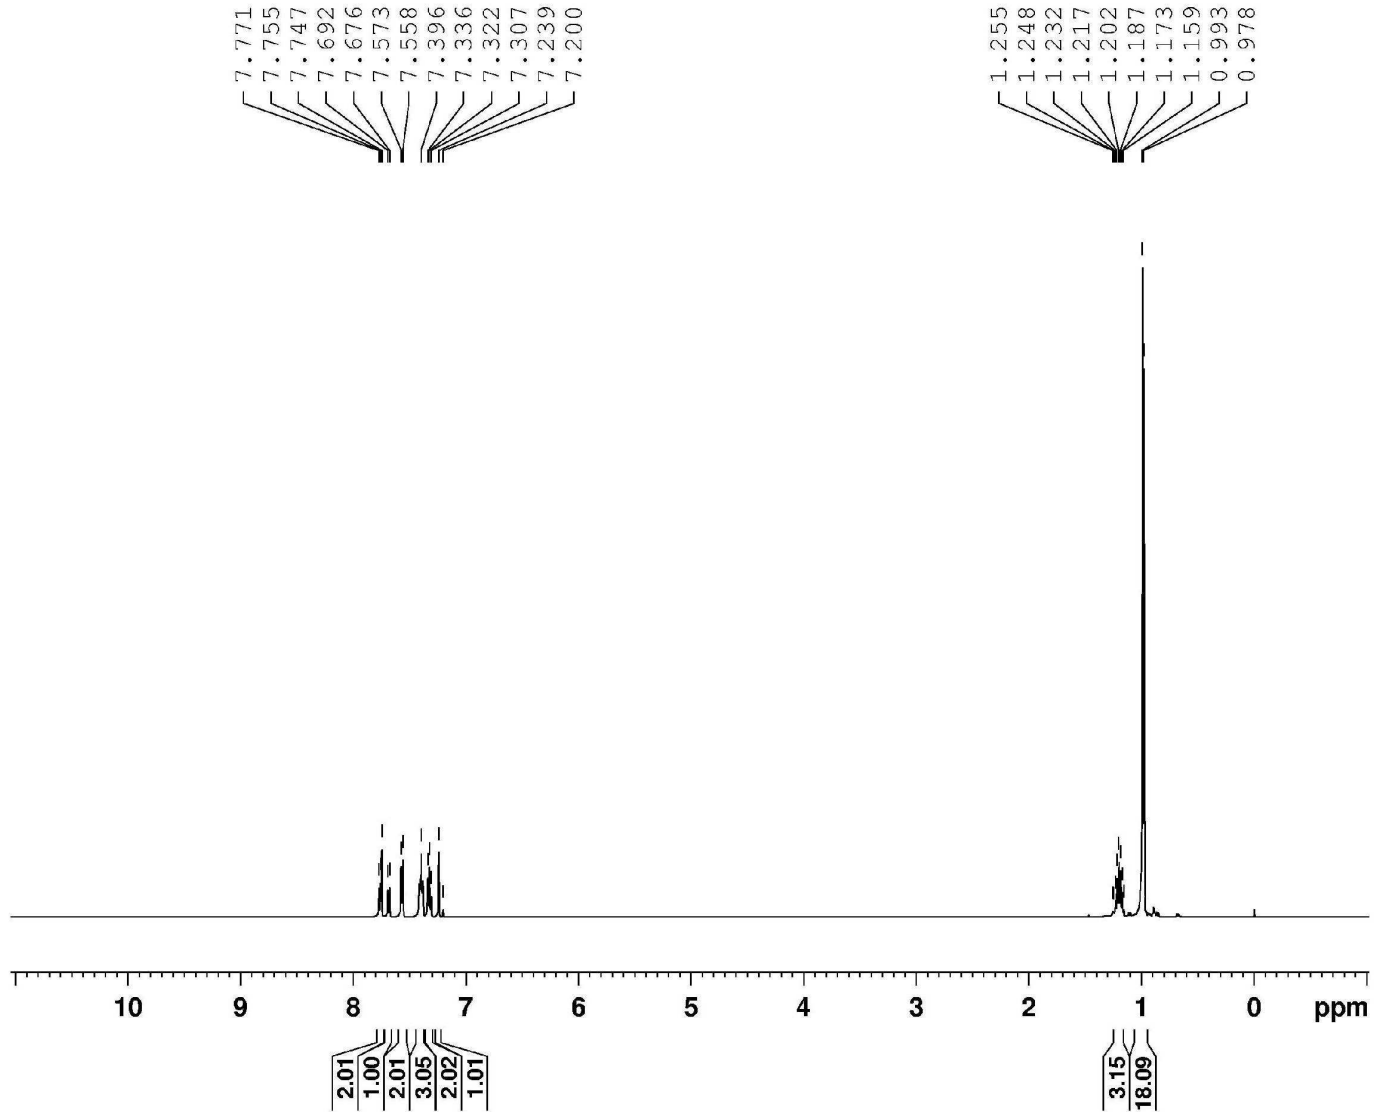

Current Data Parameters  
 NAME 1.css.214.2  
 EXPNO 1  
 PROCNO 1

F2 - Acquisition Parameters  
 Date\_ 20131127  
 Time 18.23  
 INSTRUM spect  
 PROBEH 5 mm QNP 1H/13  
 PU\_PROG zg  
 TD 59998  
 SOLVENT CDC\_3  
 NS 4  
 DS 0  
 SWH 10000.000 Hz  
 FIDRES 0.166672 Hz  
 AQ 2.999499 sec  
 RG 22.6  
 DW 50.000 usec  
 DF 7.50 usec  
 TE 294.7 K  
 EI 10.00000000 sec  
 TD0 1

CHANNEL #1  
 NUC1 1H  
 P1 10.00 usec  
 PL1 0.00 dB  
 SFO1 499.8740056 MHz

F2 - Processing parameters  
 SI 32768  
 SF 499.8700507 MHz  
 WDW no  
 SSB 0  
 FB 0.00 Hz  
 GB 0  
 PC 1.00

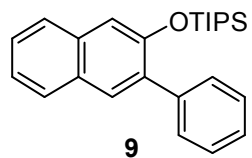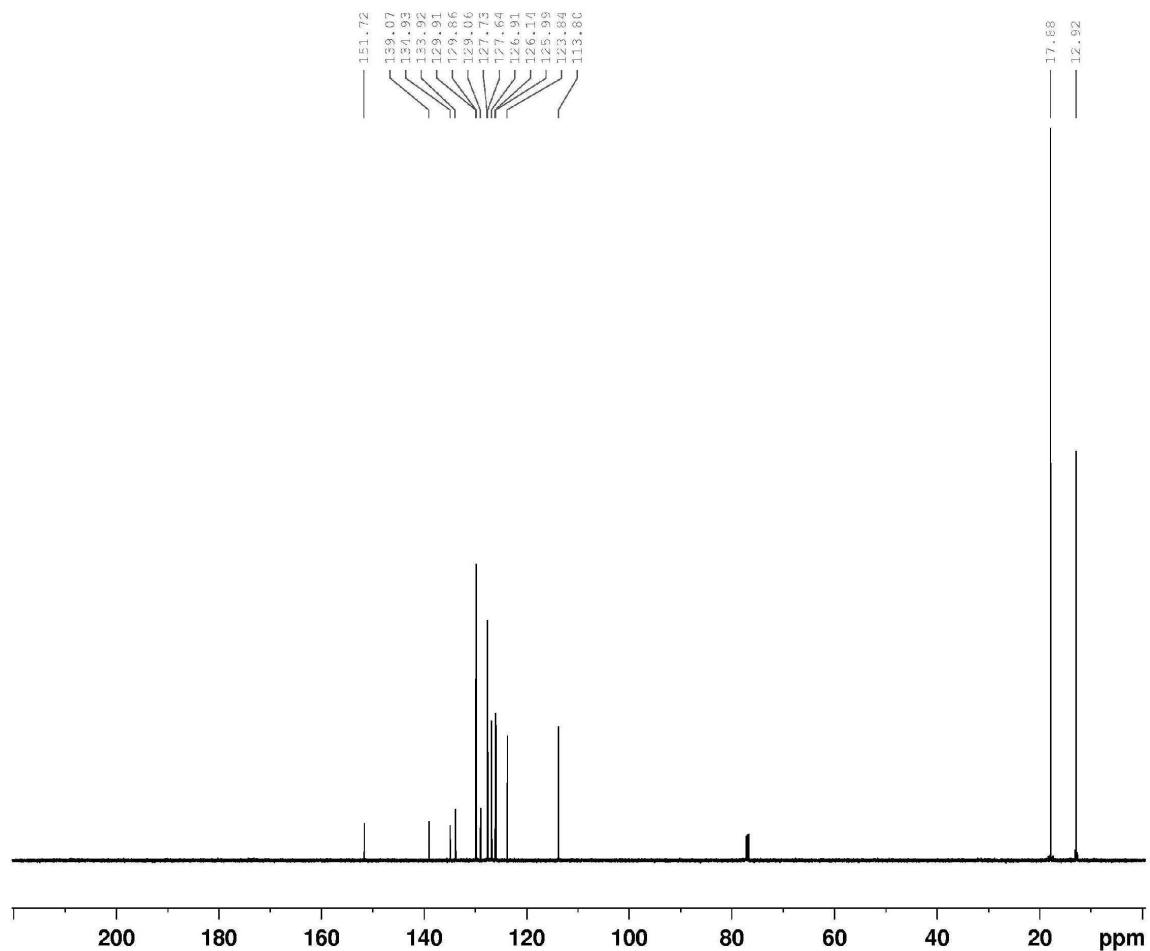

```

Current Data Parameters
NAME      1.cas.2'4.130
EXPNO     1
PROCNO    1

F2 - Acquisition Parameters
Date_     20131127
Time      18.51
INSTRUM   spect
PROBHD    5 mm QNP 1H/13
PULPROG   zgpg
TD         142854
SOLVENT   CDCl3
NS         256
DS         0
SWH        27777.177 Hz
FIDRES     0.194449 Hz
AQ         2.5714221 sec
RG         14596.5
WV         8.300 vsec
DE         7.50 vsec
TE         295.4 K
D1         2.00000300 sec
d11        0.03000300 sec
TD0        1

===== CHANNEL f1 =====
NUC1       13C
P1         8.50 vsec
PL1        0.00 dB
SFO1       125.7062372 MHz

===== CHANNEL f2 =====
CPDPRG2    waltz16
NUC2       1H
PCPD2      90.00 vsec
PL2        1.00 dB
PL12       21.00 dB
SFO2       499.8734991 MHz

F2 - Processing parameters
SI         65536
SF         125.6924240 MHz
WV         no
SSB        0
LB         0.00 Hz
GB         0
PC         1.40
  
```



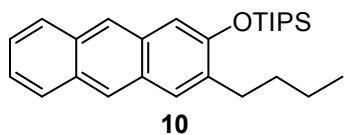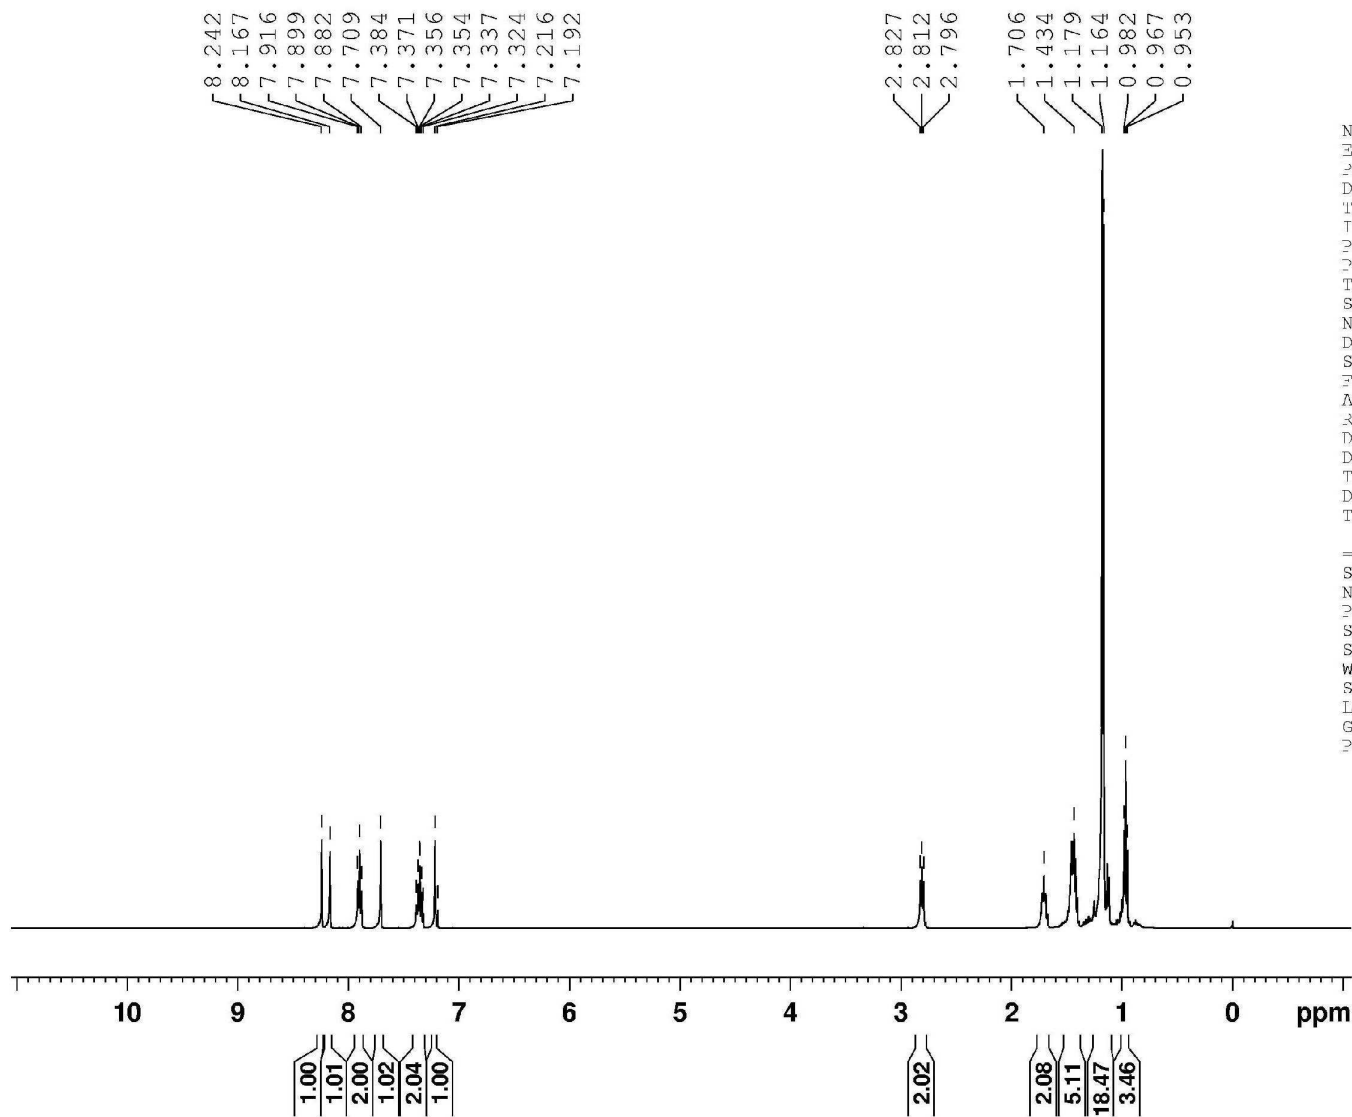

```

NAME          1.ccs.141
EXPNO         1
PROCNO        1
Date_         20130528
Time          19.57
INSTRUM       spect
PROBHD        5 mm PATXI 1H/
PULPROG       zg
TD            59998
SOLVENT       CDCl3
NS            12
DS            0
SWH           10000.000 Hz
FIDRES        0.166672 Hz
AQ            2.9999499 sec
RG            11.29
DW            50.000 usec
DE            10.00 usec
TE            294.0 K
D1            6.00000000 sec
TD0           1

===== CHANNEL f1 =====
SFO1          500.1330885 MHz
NUC1          1H
P1            8.00 usec
SI            65536
SF            500.1300468 MHz
WDW           no
SSB           0
LB            0.00 Hz
GB            0
PC            1.00
  
```

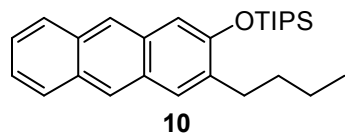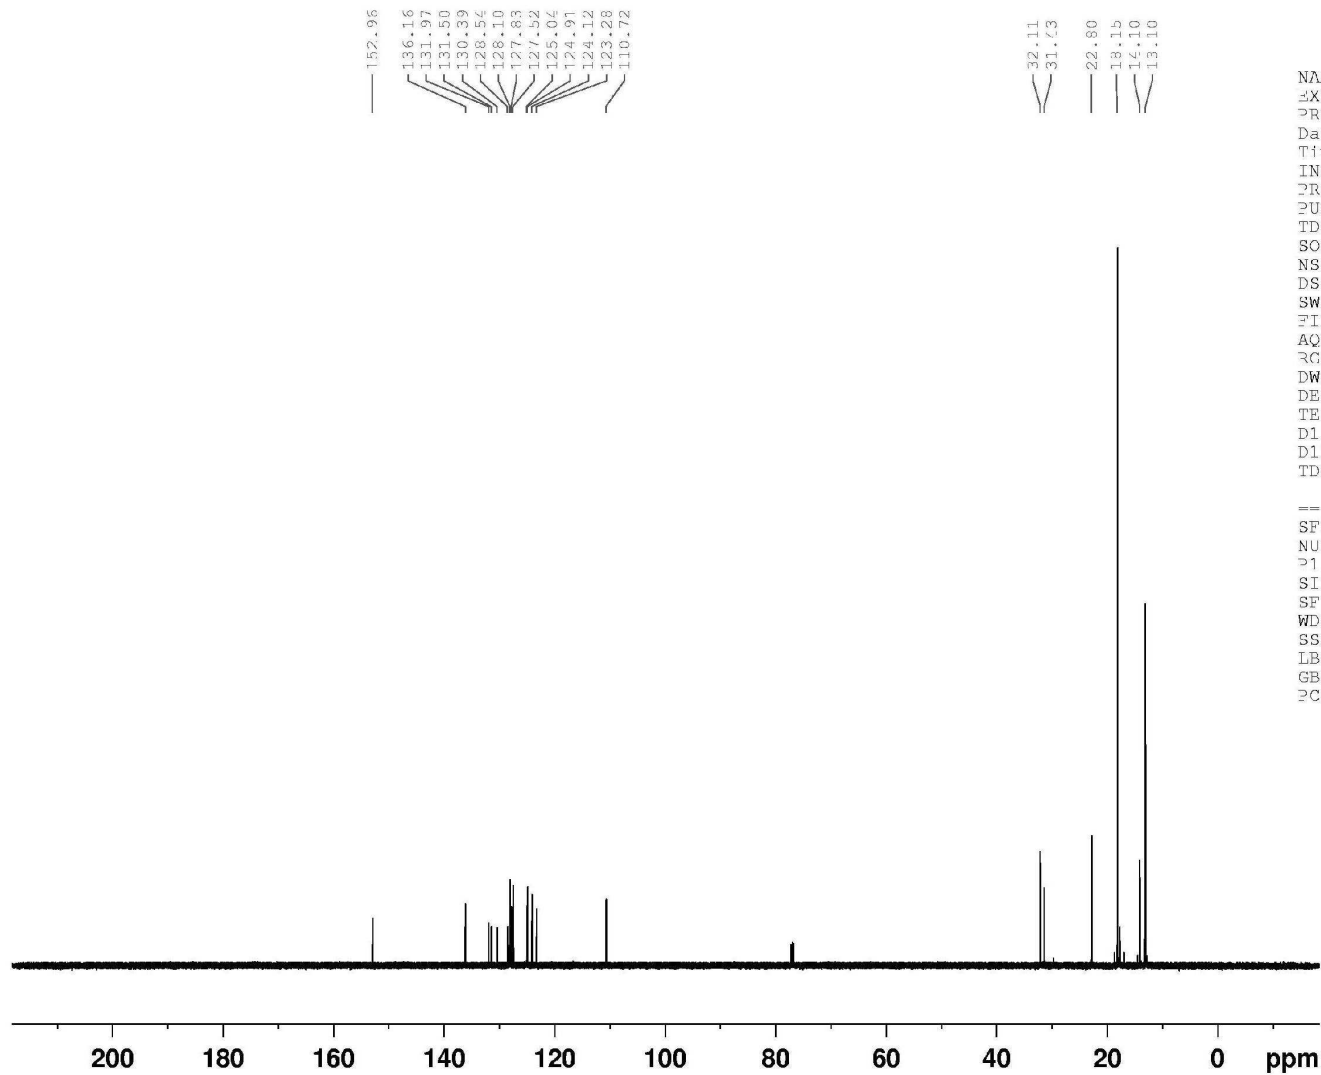

```

NAME      1.css.141.13C
EXPNO     1
PROCNO    1
Date_     20130528
Time      20.19
INSTRUM   spect
PROBHD    5 mm PATXI 1H/
PULPROG   zgpg
TD         178568
SOLVENT   CDCl3
NS         200
DS         0
SWH       29761.904 Hz
FIDRES    0.166670 Hz
AQ         2.9999924 sec
RG         96.79
DW         16.800 usec
DE         10.00 usec
TE         295.2 K
D1         2.00000000 sec
D11        0.03000000 sec
TDC        1
  
```

```

----- CHANNEL f1 -----
SFO1     125.7703643 MHz
NUC1      13C
P1        14.00 usec
SI        131072
SF        125.7577999 MHz
WDW       no
SSB       0
LB        0.00 Hz
GB         0
PC         1.40
  
```

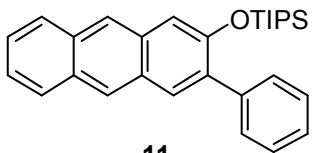

11

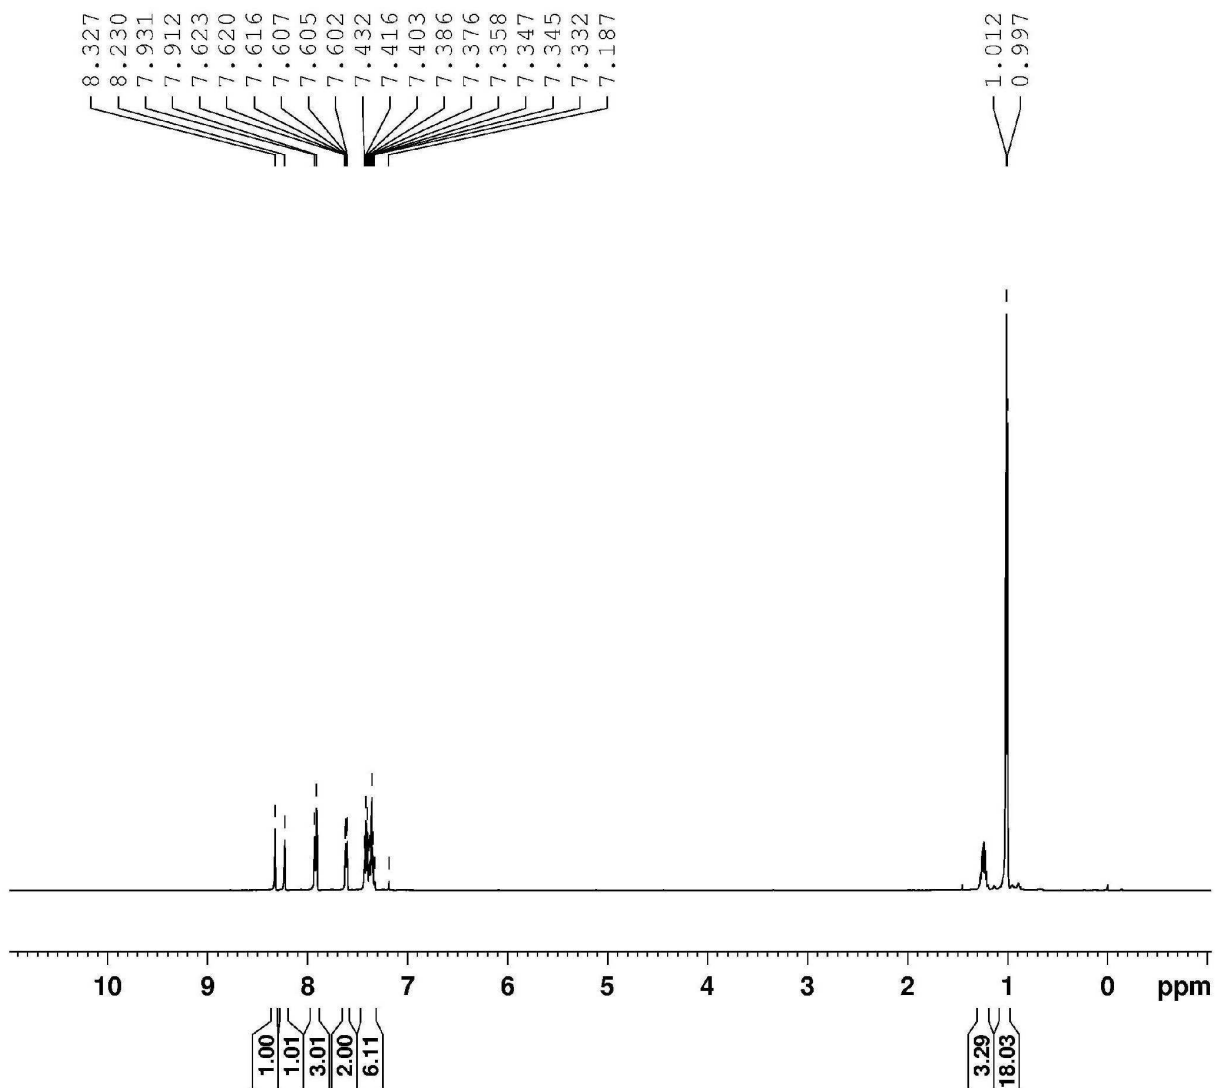

Current Data Parameters  
 NAME 1.ccs.215.3  
 EXPNO 1  
 PROCNO 1

F2 - Acquisition Parameters  
 Date\_ 20131202  
 Time 16.58  
 INSTRUM spect  
 PROBED 5 mm QNP 1H/13  
 PULPROG zg  
 TD 59998  
 SGLVWIN CXC13  
 NS 4  
 DS 0  
 SWH 10000.000 Hz  
 FIDRES 0.166672 Hz  
 AQ 2.9999499 sec  
 RG 20.2  
 DW 50.000 usec  
 DE 7.50 usec  
 TE 294.6 K  
 D1 8.00000000 sec  
 TD0 1

===== CHANNEL f1 =====  
 NUC1 1H  
 P1 10.00 usec  
 PL1 0.00 dB  
 SFO1 499.8740056 MHz

F2 - Processing parameters  
 SI 32768  
 SF 499.8700566 MHz  
 WDW no  
 SSB 0  
 LB 0.00 Hz  
 GB 0  
 PC 1.00

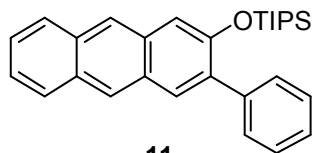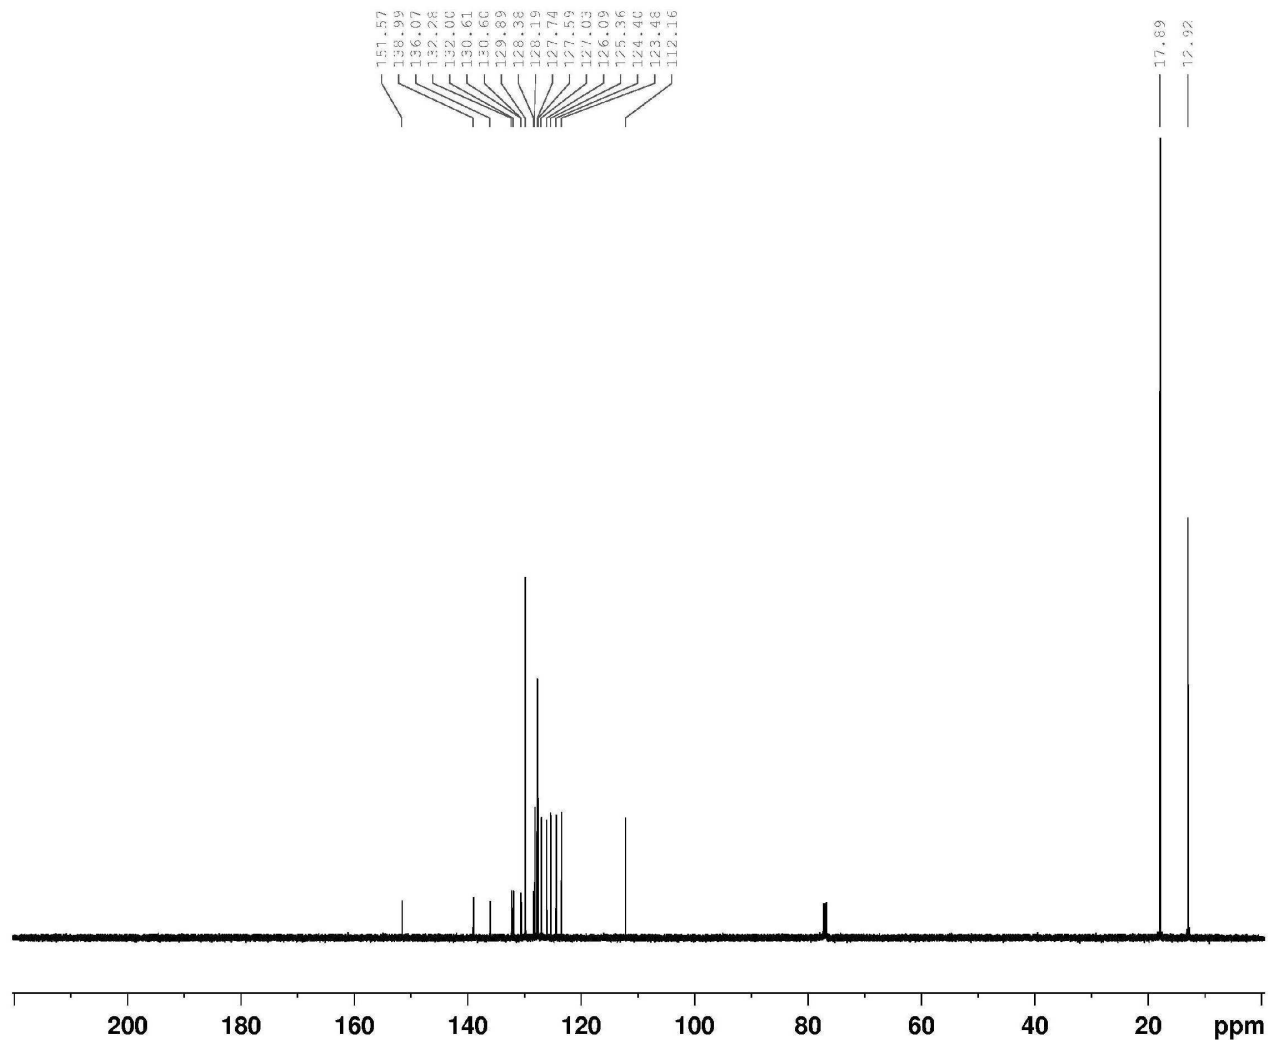

```

Current Data Parameters
NAME 1.cvs.215.130
EXPNO 1
PROCNO 1

F2 - Acquisition Parameters
Date_ 20131202
Time 17.18
INSTRUM spect
PROBHD 5 mm QNP 1H/13
PU_PRGC zgpg
TD 142854
SOVENT CDCl3
NS 128
DS 0
SWH 27777.777 Hz
FIDRES 0.194449 Hz
AQ 2.5714221 sec
RG 10321.3
EW 18.000 usec
DF 7.50 usec
TE 295.1 K
D1 2.00000000 sec
d11 0.03000000 sec
ED 1

===== CHANNEL f1 =====
NUC1 13C
P1 8.50 usec
PL1 0.00 dB
SFO1 125.7682372 MHz

===== CHANNEL f2 =====
CPDPRG2 waltz16
NUC2 1H
PCPDZ 30.00 usec
P2 1.00 dB
PL2 21.00 dB
SFO2 499.8734991 MHz

F2 - Processing parameters
SI 55536
SF 125.6924276 MHz
WDW no
SSE 0
P 0.00 Hz
GB 0
EC 1.40
  
```

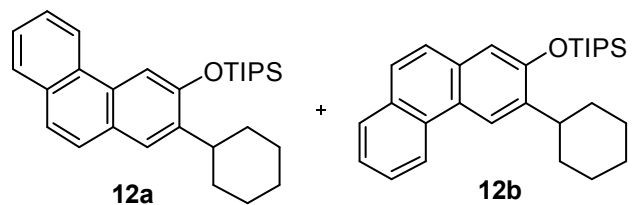

(General Procedure 1)

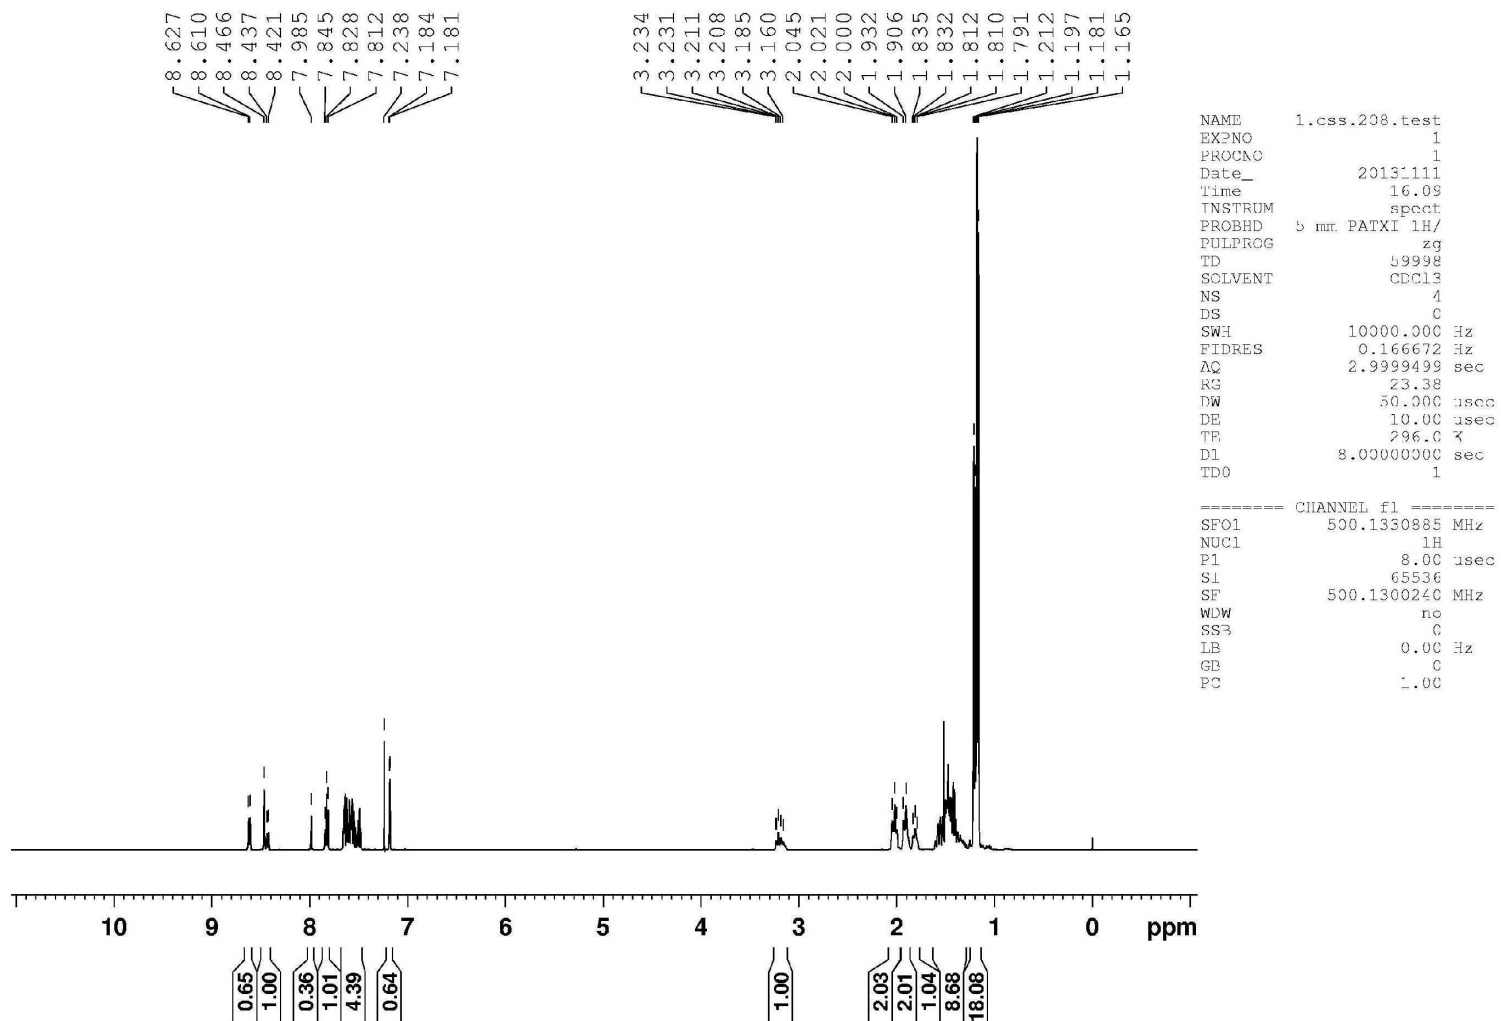

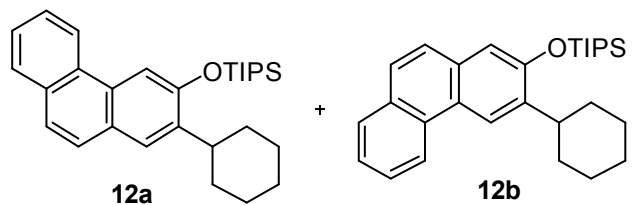

(General Procedure 2)

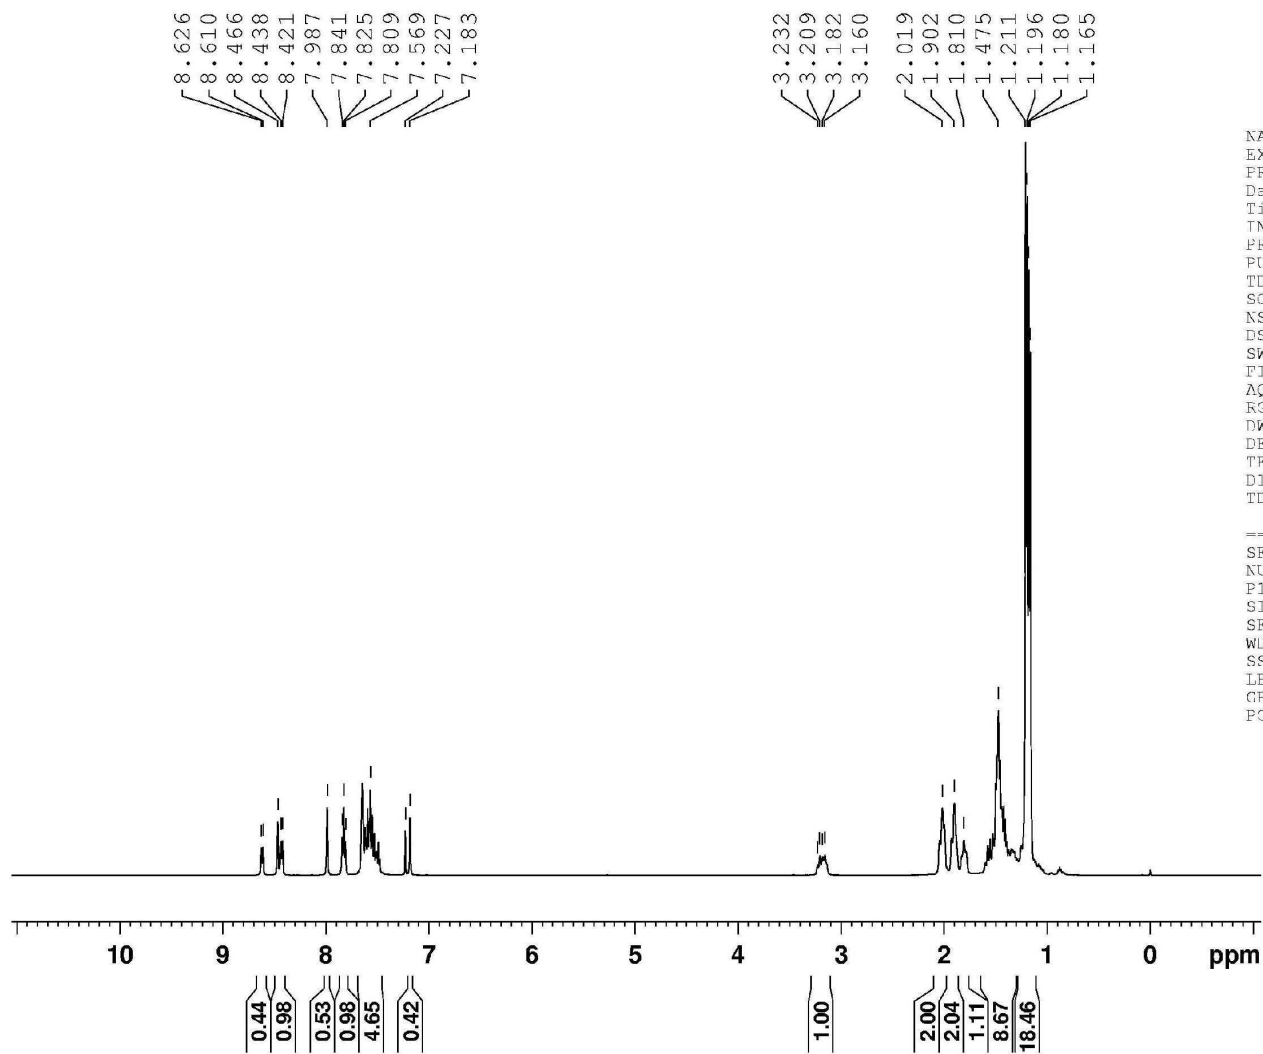

```

NAME          1.css.209
EXPNO         1
PROCNO        1
Date_         2013_115
Time          15.53
INSTRUM       spect
PROBHD        5 mm PAXI 1H/
PULPROG       zg
TD            59998
SOLVENT       CDCl3
NS            4
DS            0
SWH           10000.000 Hz
FIDRES        0.166672 Hz
AQ            2.9999499 sec
RG            15.84
DW            50.000 usec
DE            10.00 usec
TE            295.7 K
D1            8.0000000 sec
TD0           1

===== CHANNEL f1 =====
SF01          500.1330885 MHz
NUC1          1H
P1            8.00 usec
SI            65536
SF            500.1300296 MHz
WDW           no
SSB           0
LB            0.00 Hz
GR            0
PC            1.00
  
```

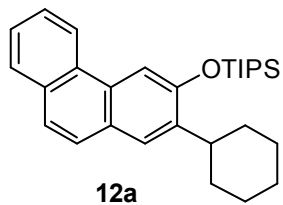

+

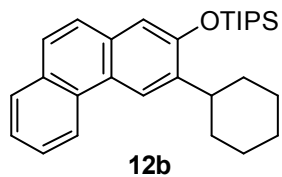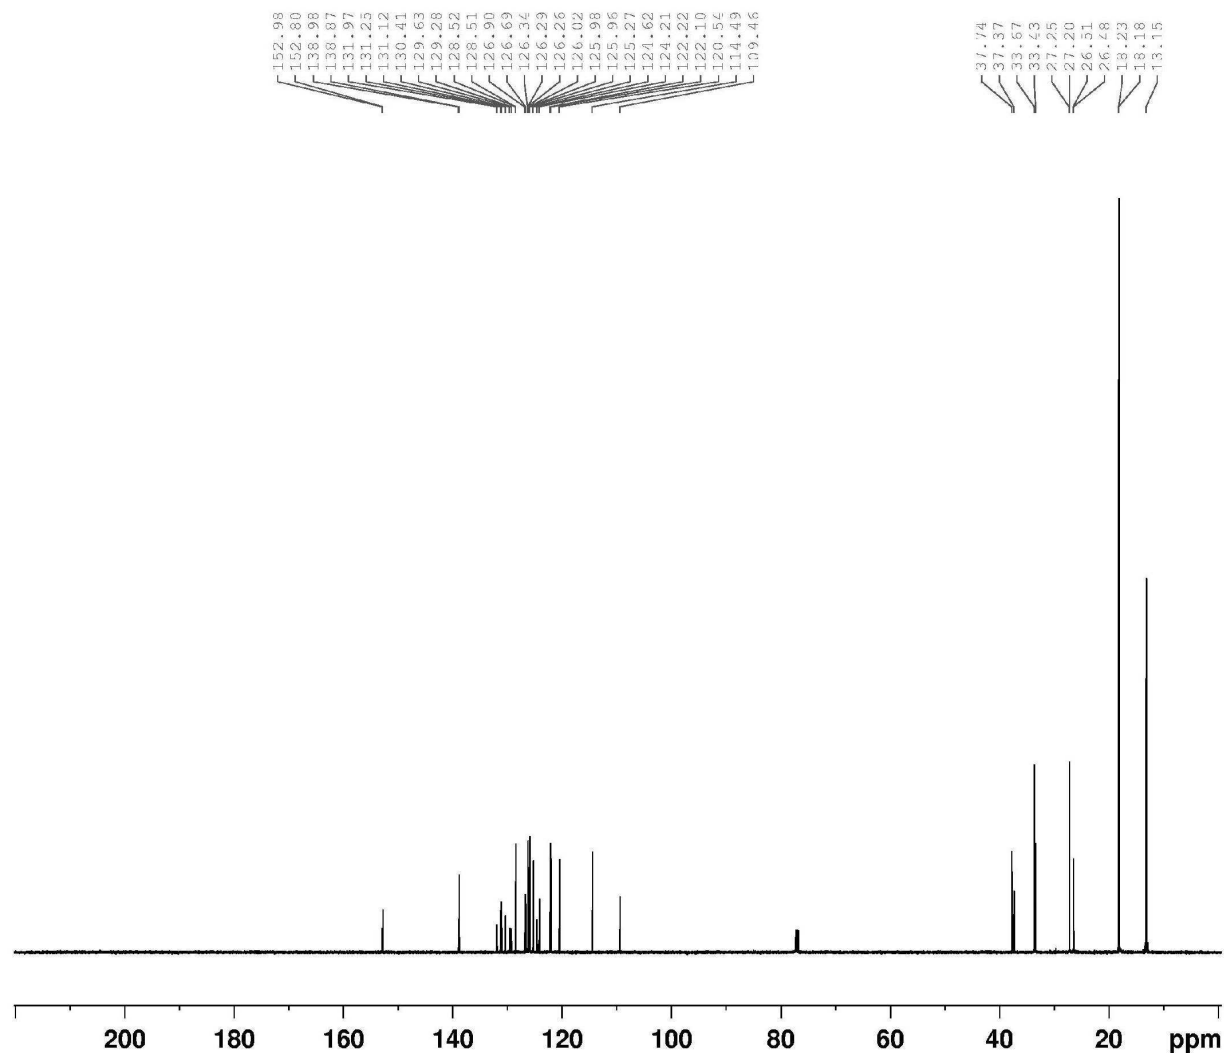

```

NAME      1.css.208.13C
EXPNO     1
PROCNO    1
Date_     2013.111
Time      8.17
INSTRUM   spect
PROBHD    b mr. QNP 1H/13
PULPROG   zgdc
TD         142854
SOLVENT   CDCl3
NS         256
DS         0
SWH        27777.777 Hz
FIDRES    0.194449 Hz
AQ         2.5714221 sec
RG         9195.2
DW         18.000 usec
DE         7.50 usec
TE         295.3 K
D1         2.0000000 sec
d11        0.0300000 sec
TD0        1
  
```

```

----- CHANNEL f1 -----
NUC1       13C
P1         8.50 usec
PL1        0.00 dB
SFO1       25.7062372 MHz
  
```

```

===== CHANNEL f2 =====
CPDPRG2    waltz16
NUC2        1H
PCPD2      90.00 usec
PL2         1.00 dB
PL12        21.00 dB
SFO2       499.8734991 MHz
ST          65536
SF         125.6924334 MHz
WDW         no
SS3         0
LB          0.00 Hz
GB          0
PC          1.40
  
```

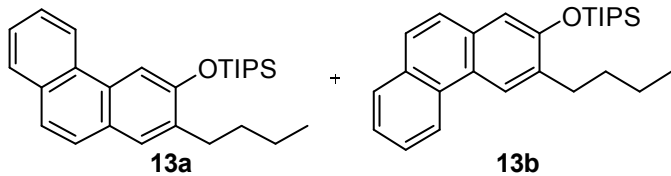

(General Procedure 1)

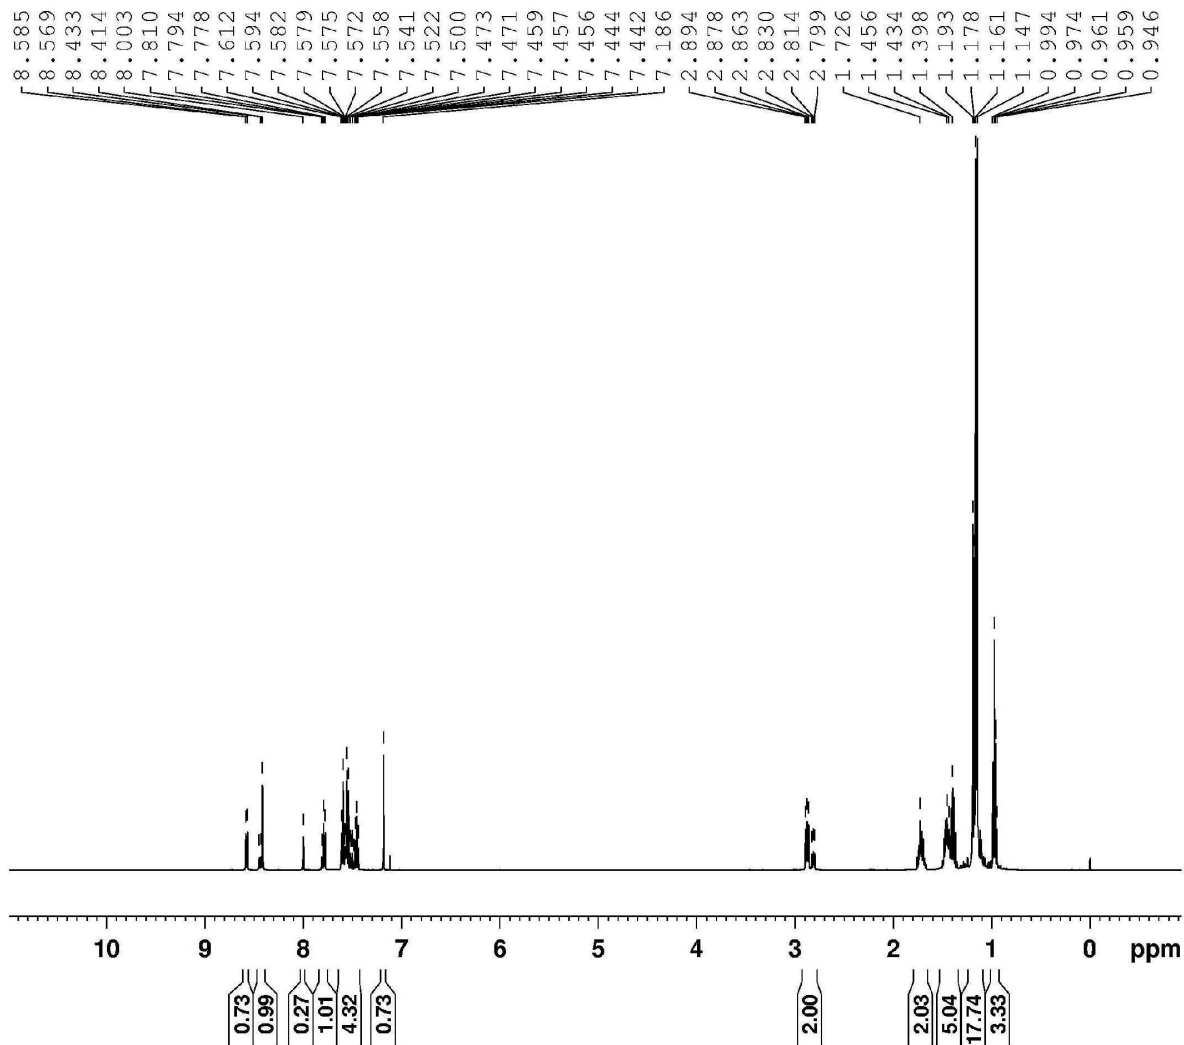

```

NAME      1.csa.186.test
EXPNO     1
PROCNO    1
Date_     201309_9
Time      15.37
INSTRUM   spect
PROBHD    5 mm PATXI 1H/
PULPROG   zg
TD         59998
SOLVENT   CDC_3
NS         4
DS         0
SWE       10000.000 Hz
FIDRES    0.166672 Hz
AQ        2.9999499 sec
RG         6.92
OW        50.000 usec
DE        10.00 usec
TE        296.2 K
D1        8.0000000 sec
TDO       1
  
```

```

===== CHANNEL #1 =====
SF01     500.1330885 MHz
NUC1      1H
P1        8.00 usec
S1        65536
SF        500.1300837 MHz
WDW       no
SSB       0
LB        0.00 Hz
GB        0
PC        1.00
  
```



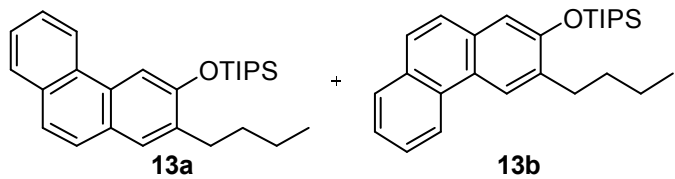

(General Procedure 2)

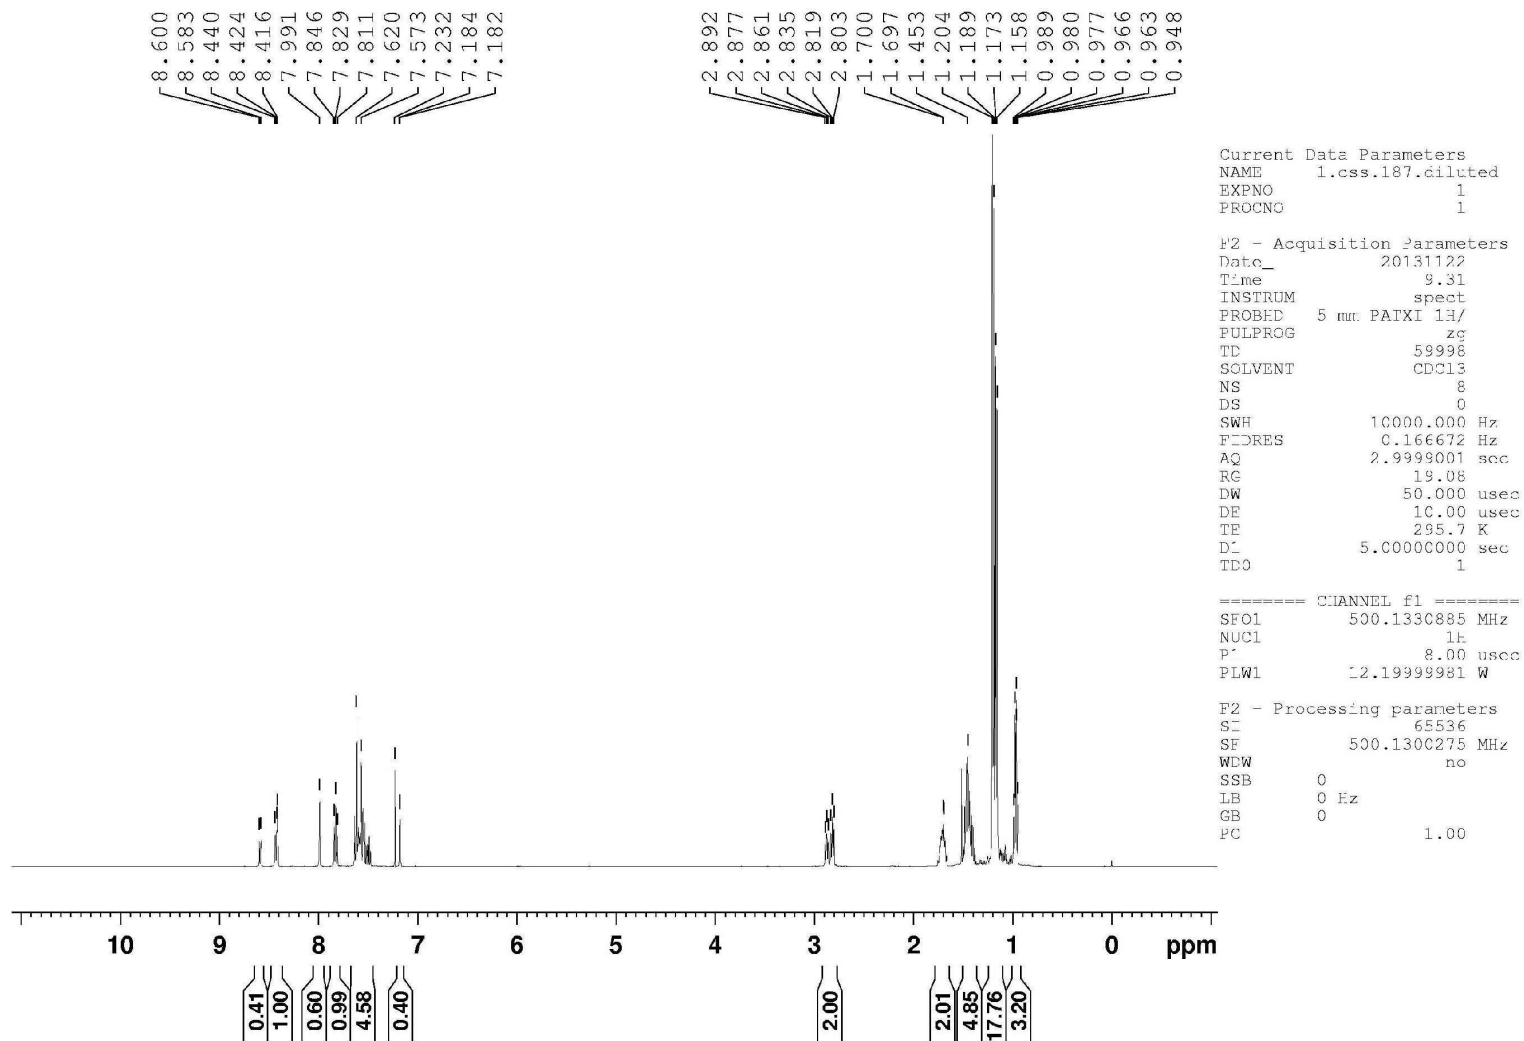

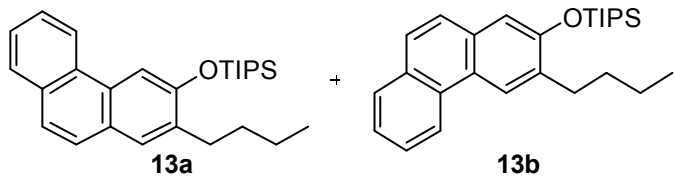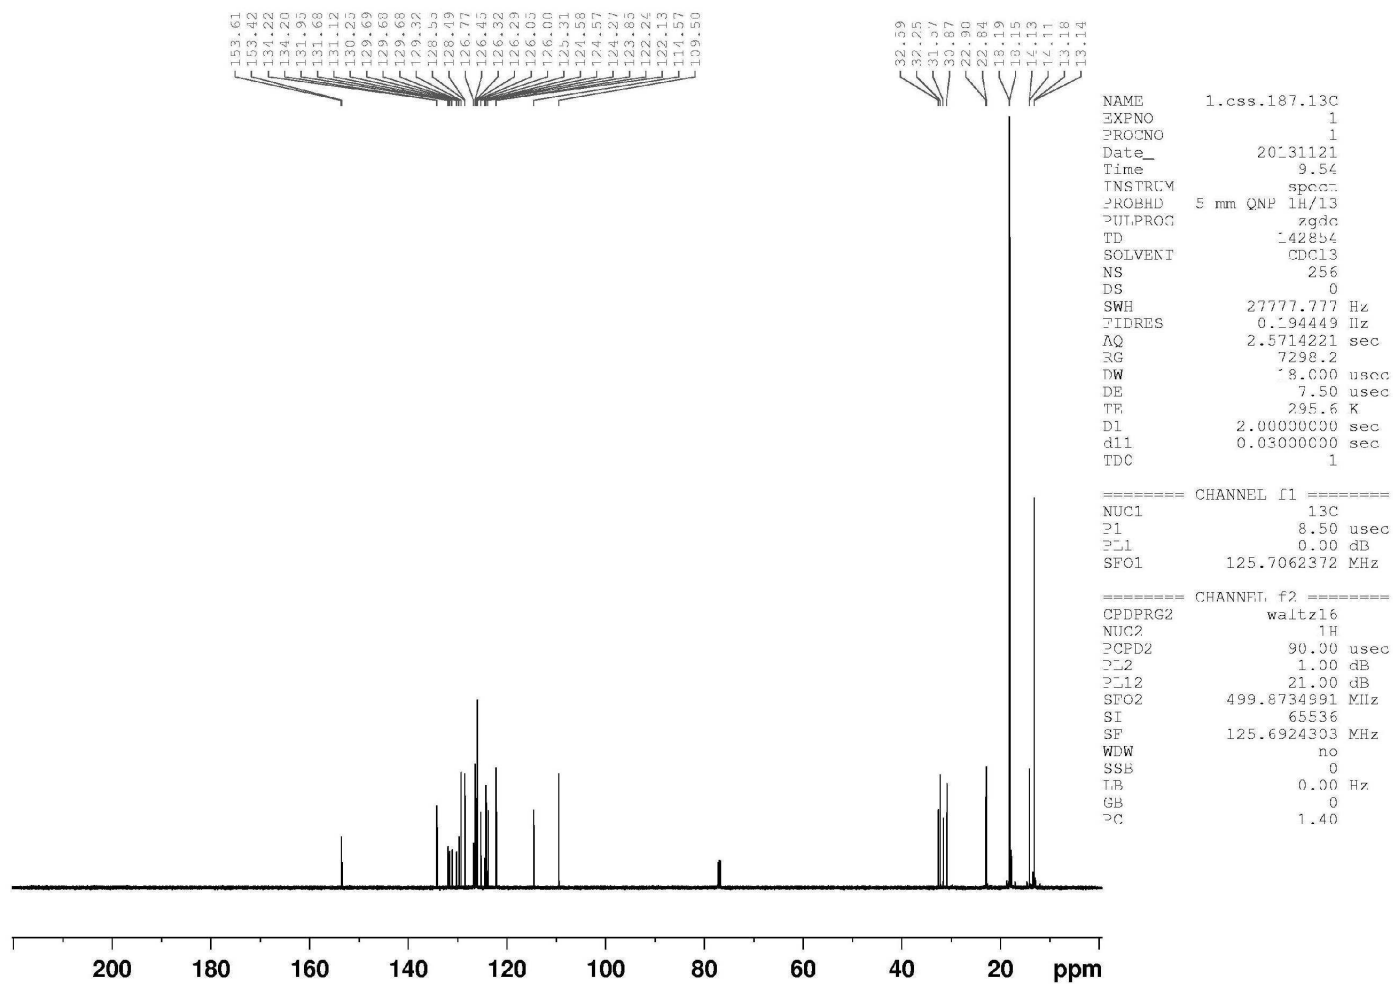

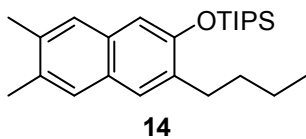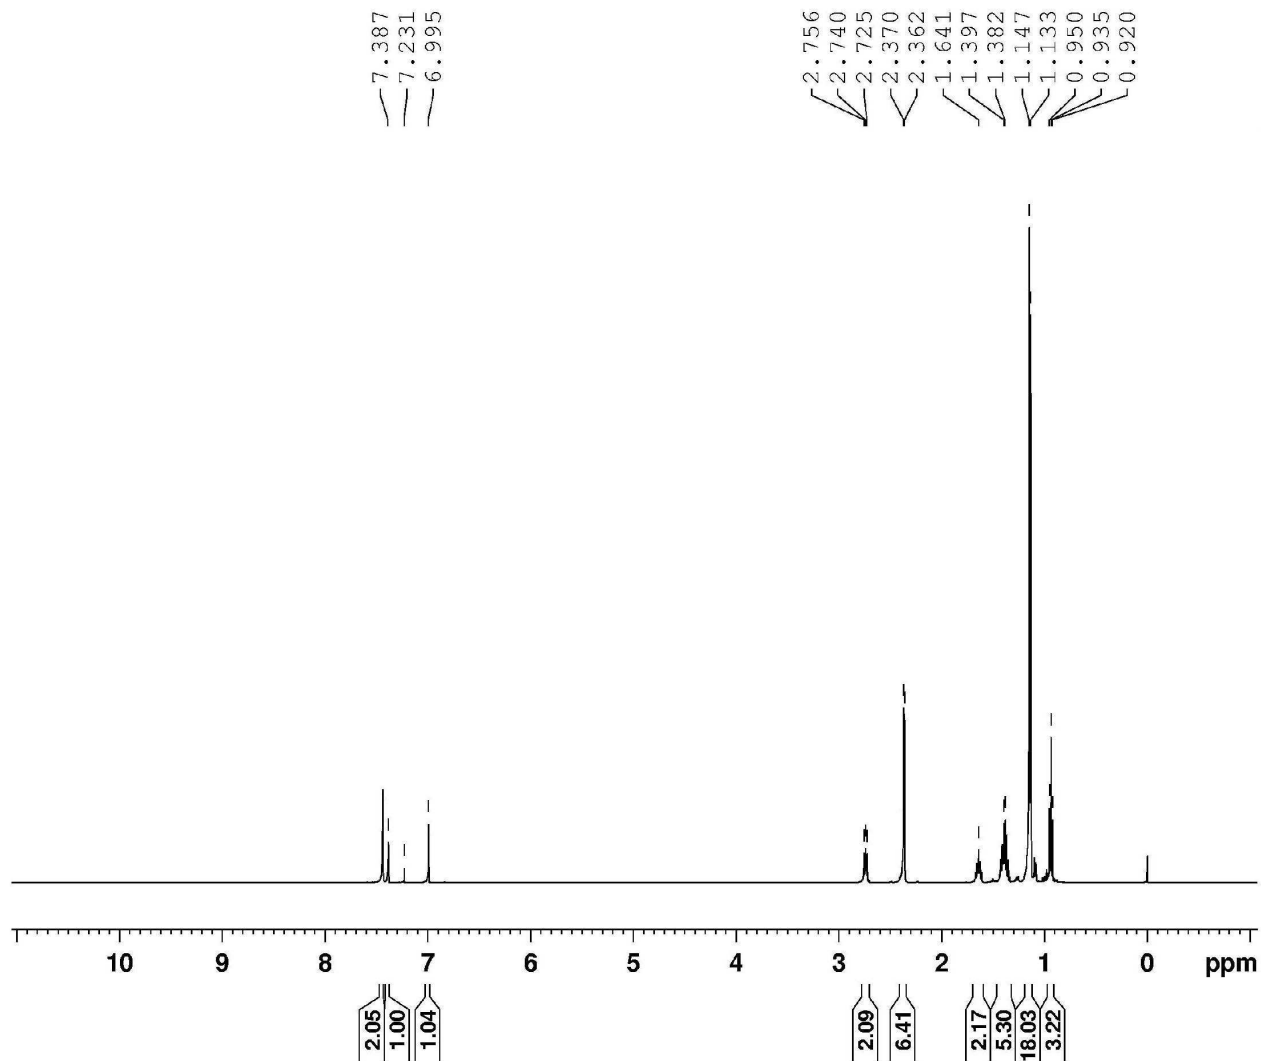

```

NAME          1.css.137
EXPNO         1
PROCNO        1
Date_         20130524
Time_         18.42
INSTRUM       spect
PROBHD        5 mm PATXI LH/
PULPROG       zg
TD            59998
SOLVENT       CDCl3
NS            12
DS            0
SWH           10000.000 Hz
FIDRES        0.166672 Hz
AQ            2.9999499 sec
RG            19.08
DW            50.000 usec
DE            10.00 usec
TE            295.4 K
D1            6.00000000 sec
TDC           1
  
```

```

===== CHANNEL f1 =====
SFO1          500.1330885 MHz
NUC1          1H
P1            8.00 usec
SI            65536
SF            500.1300274 MHz
WDW           no
SSB           0
LB            0.00 Hz
GB            0
PC            1.00
  
```

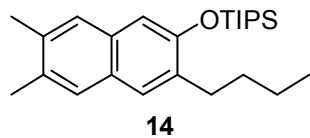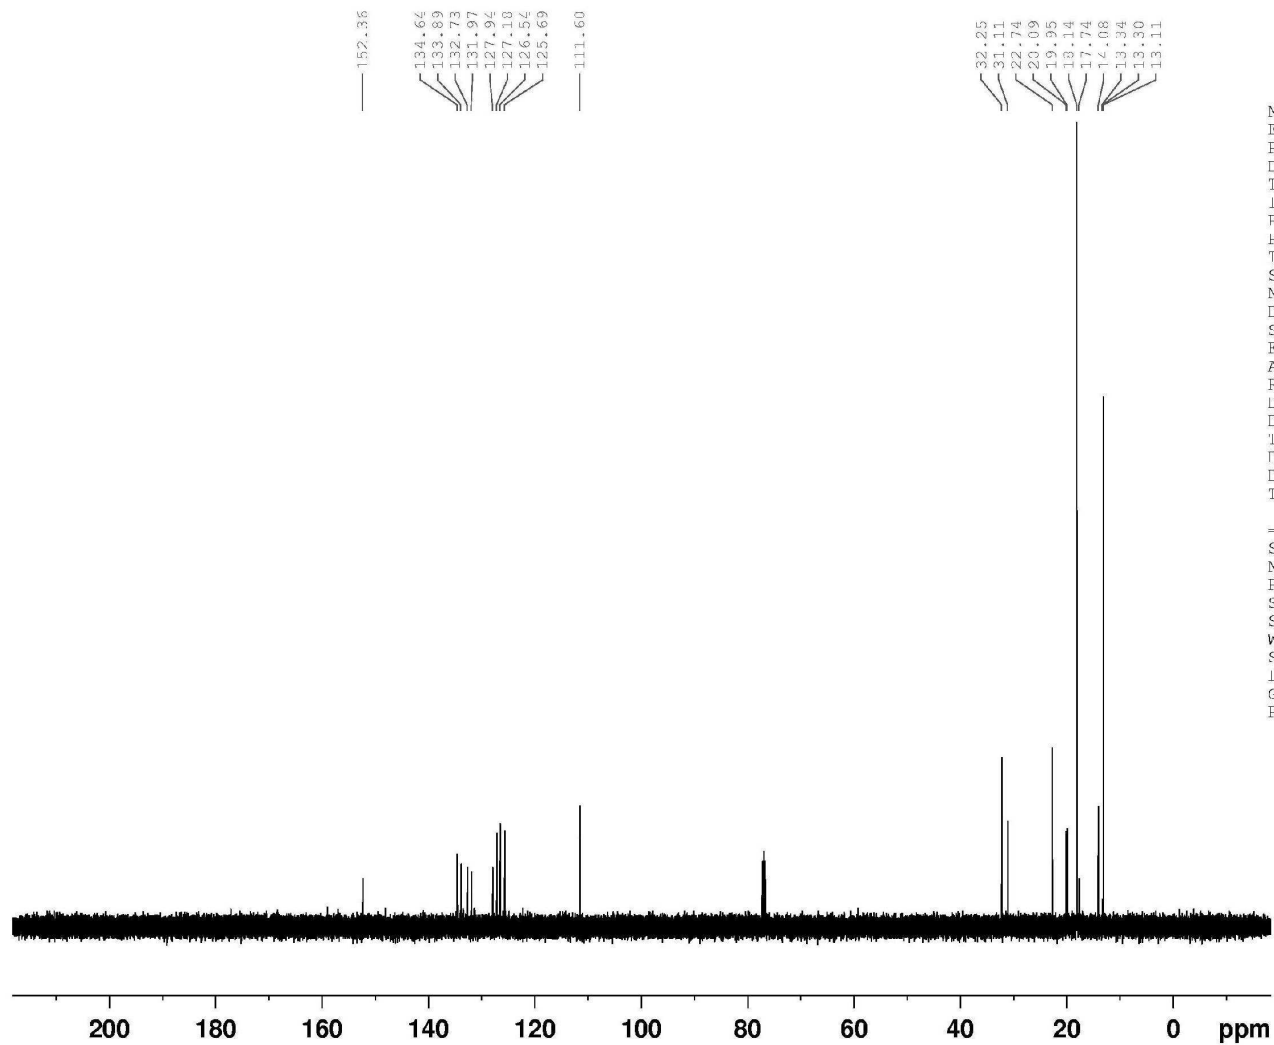

```

NAME      1.css.137.130
EXPNO     -
PROCNO    -
Date_     20130524
Time      18.59
INSTRUM   spect
PROBHD    5 mm PATXI 1F/
PULPROG   zgdc
TD         178568
SOLVENT   CDCl3
NS         150
DS         0
SWH       29761.904 Hz
FIDRES    0.166670 Hz
AQ         2.9959924 sec
RG         196.79
DW         16.800 usec
DE         10.00 usec
TE         296.9 K
D1         2.0000000 sec
D11        0.0300000 sec
TDO        -
  
```

```

===== CHANNEL f1 =====
SF01     125.7703643 MHz
NUC1      13C
P1        14.00 usec
SI        131072
SF        125.7577942 MHz
WDW       rc
SSB       0
LB        0.00 Hz
GB        0
PC        1.40
  
```

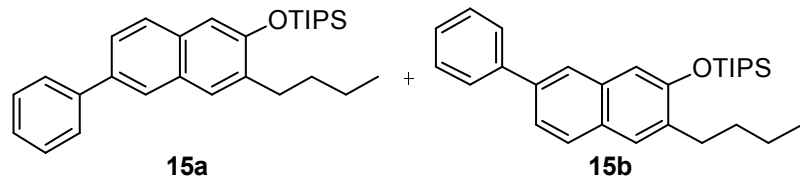

(General Procedure 1)

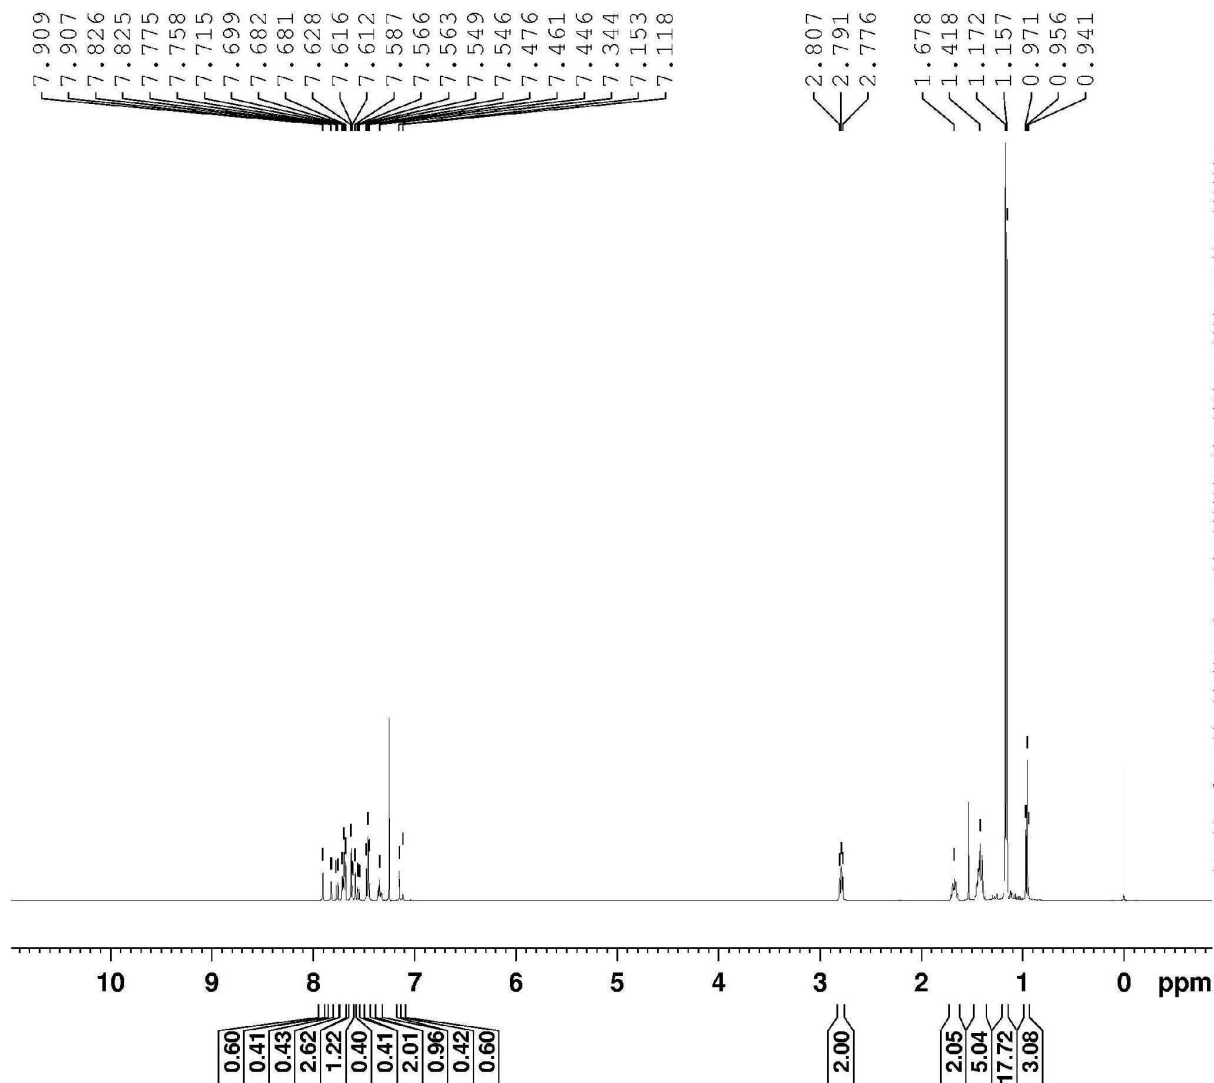

Current Data Parameters  
 NAME 1.css.151.q  
 EXPNO 1  
 PROCNO 1

F2 - Acquisition Parameters  
 Date\_ 20140423  
 Time 16.24  
 INSTRUM spect  
 PROBHD 5 mm PATXI 1H/  
 PULPROG zg  
 TD 59998  
 SOLVENT CDCl3  
 NS 8  
 DS 0  
 SWH 10000.000 Hz  
 FIDRES 0.166672 Hz  
 AQ 2.9999001 sec  
 RG 87.71  
 DW 50.000 usec  
 DE 10.00 usec  
 TE 295.7 K  
 D1 5.0000000 sec  
 TDC 1

===== CHANNEL f1 =====  
 SF01 500.1330885 MHz  
 NUC1 1H  
 P1 8.00 usec  
 PLW1 12.19999981 W

F2 - Processing parameters  
 SI 65536  
 SF 500.1300168 MHz  
 WDW no  
 SSB 0  
 LB 0 Hz  
 GB 0  
 PC 1.00

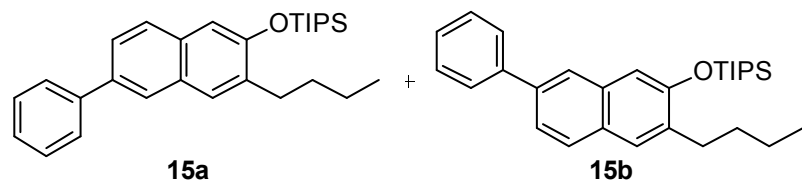

(General Procedure 2)

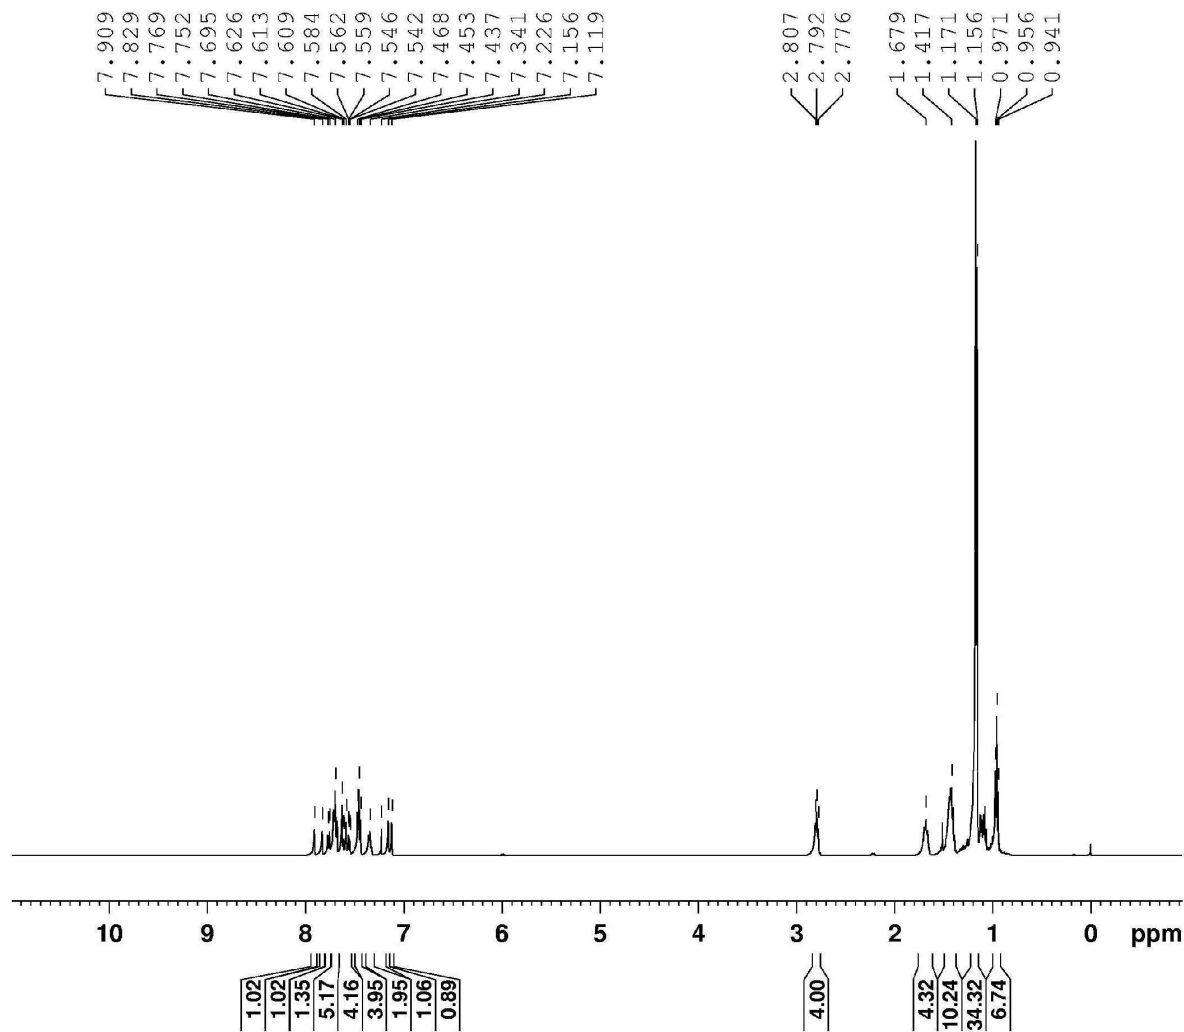

```

NAME      1.ccs.152.1
EXPNO     1
PROCNO    1
Date_     20130717
Time      18.48
INSTRUM   spect
PROBHD    5 mm PATXI 1H/
PULPROG   zg
TD         59998
SOLVENT   CDC_3
NS         8
DS         0
SWH        10000.000 Hz
FIDRES     0.166672 Hz
AQ         2.9999499 sec
RG         20.66
DW         50.000 usec
DE         10.000 usec
TE         294.9 K
D1         5.00000000 sec
TDC        1
  
```

```

===== CHANNEL f1 =====
SFO1      500.1330885 MHz
NUC1       1H
P1         8.00 usec
SI         65536
SF         500.1300306 MHz
WDW        no
SSB        0
LB         0.00 Hz
GB         0
PC         1.00
  
```

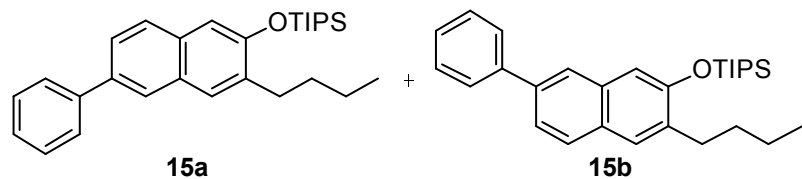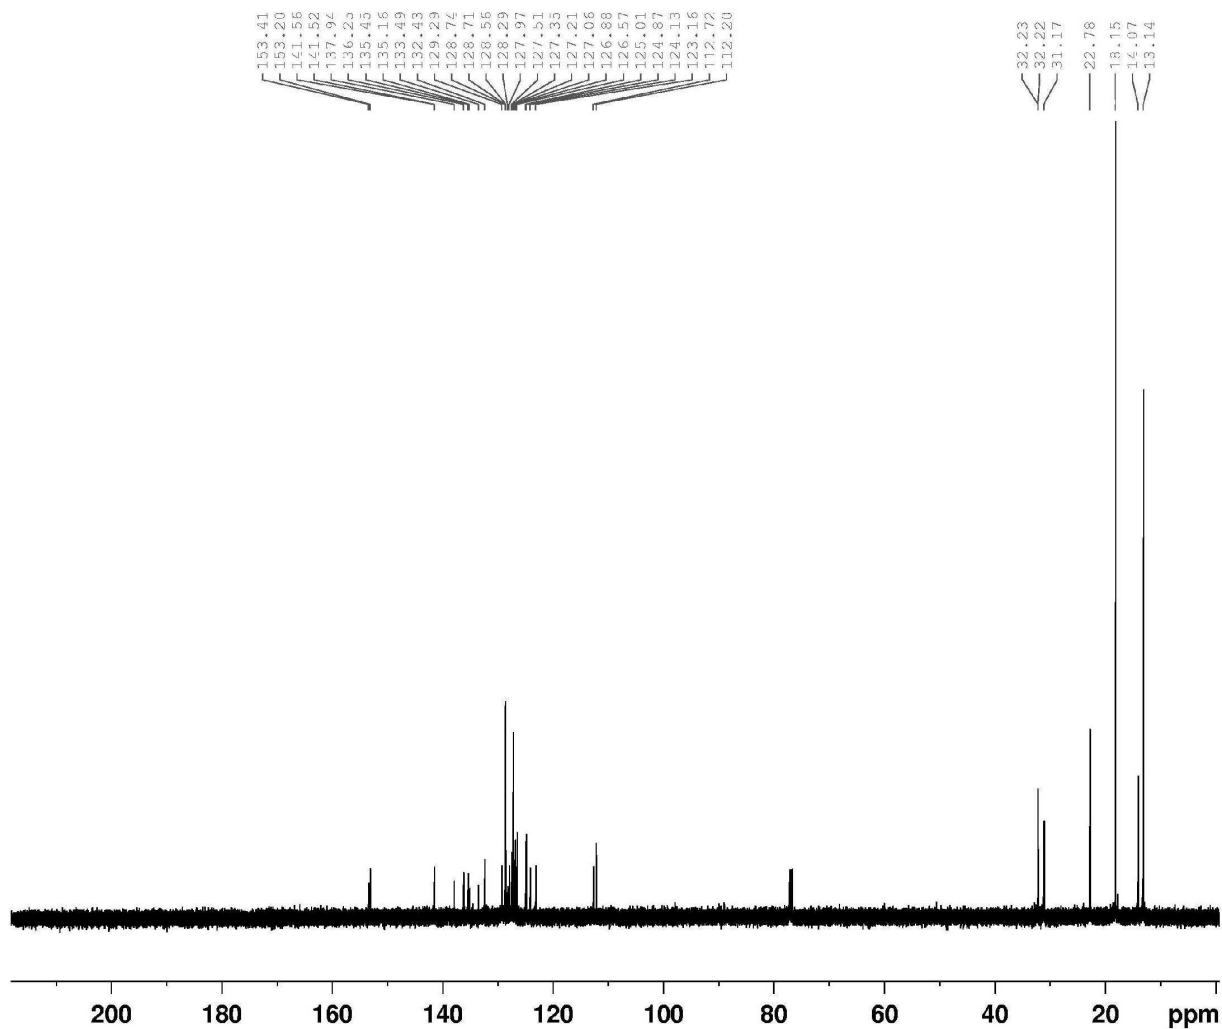

```

NAME      1.ccs.15_13C.2
EXPNO     1
PROCNO    1
Date_     20130725
Time      18.59
INSTRUM   spect
PROBHD    5 mm PATXI 1H/
PULPROG   zgpgc
TD        178568
SOLVENT   CDCl3
NS        300
DS        0
SWH       29761.904 Hz
FIDRES    0.166670 Hz
AQ        2.9999927 sec
RG        196.79
DW        16.800 usec
DE        10.00 usec
TE        296.1 K
D1        2.0000000 sec
D11       0.0300000 sec
TDC       1

===== CHANNEL f1 =====
SFO1      125.7703643 MHz
NUC1      13C
P1        14.00 usec
SI        131072
SF        125.7577982 MHz
WDW       no
SSB       0
TB        0.00 Hz
GB        0
PC        1.40
  
```

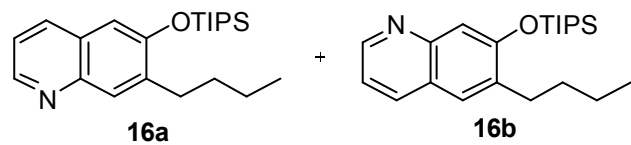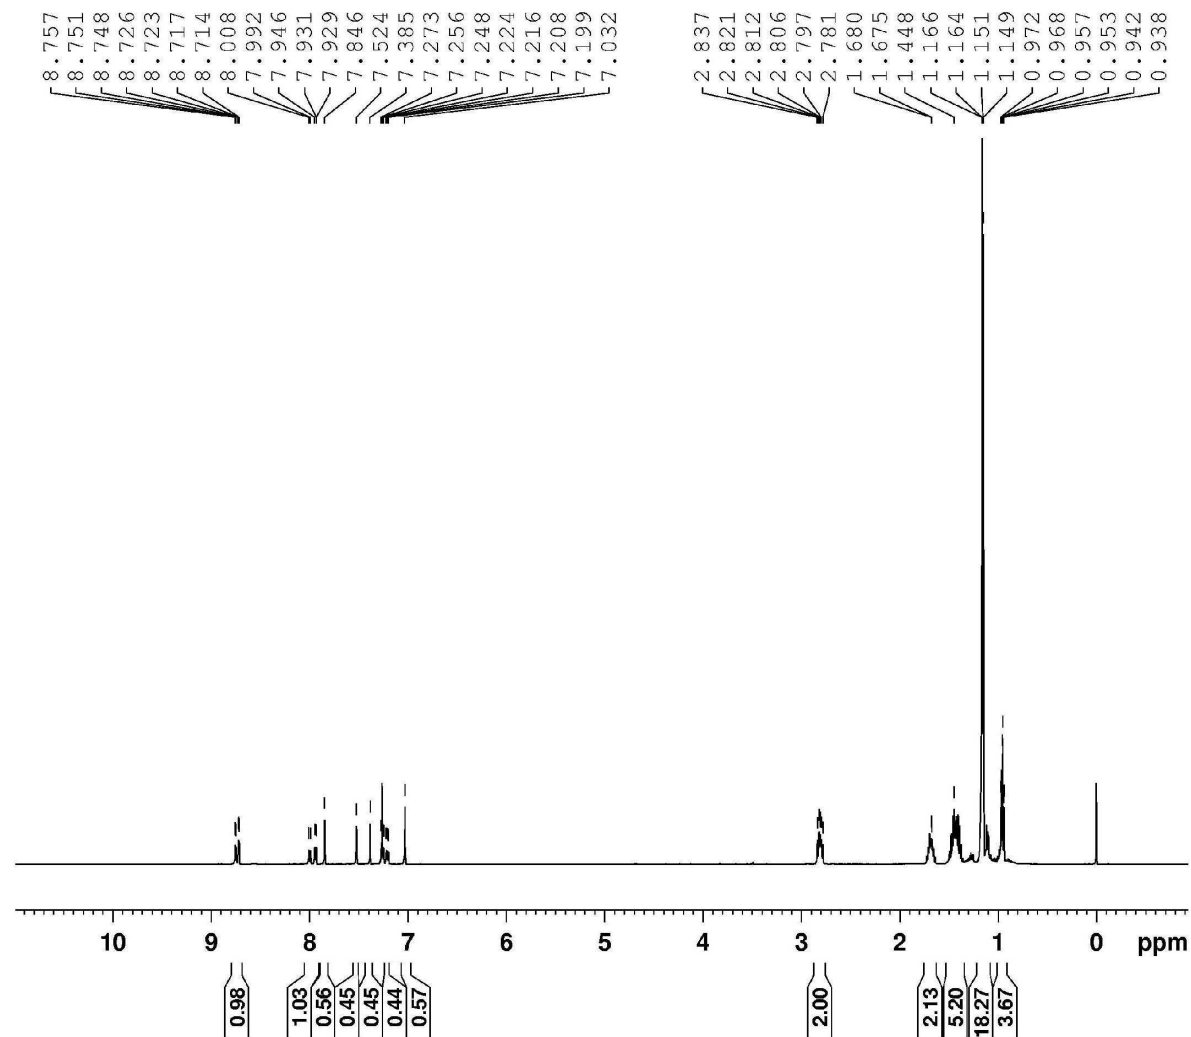

```

NAME       1.csa.188.res=
EXPNO      1
PROCNO     1
Date_      20130923
Time       17.24
INSTRUM    spect
PROBHD     5 mm PATXI 1H/
PULPROG    zg
TD          49
SOLVENT    CDCl3
NS          4
DS          0
SWH         10000.000 Hz
FIDRES      0.166672 Hz
AQ          2.9999499 sec
RG          37.62
DW          50.000 usec
DE          10.00 usec
TE          296.1 K
D1          8.00000000 sec
TDC         1

----- CHANNEL f1 -----
SFO1       500.1330885 MHz
NUC1        1H
P1          8.00 usec
ST          65536
SF          500.1300123 MHz
WDW         no
SSB         0
LB          0.00 Hz
GB          0
PC          1.00

```



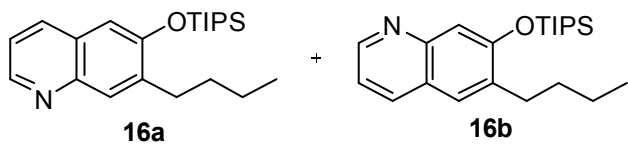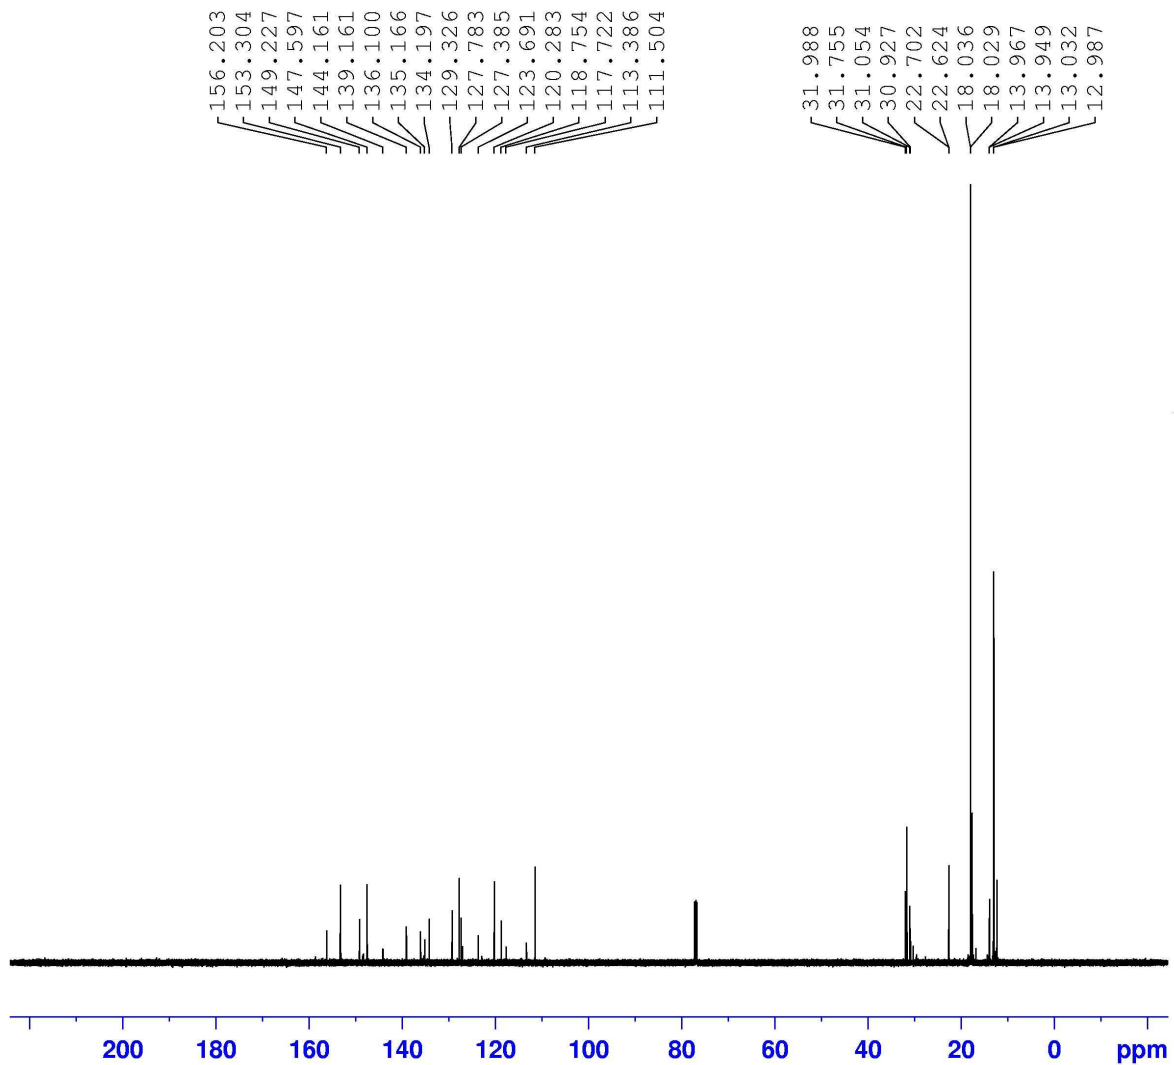

```

NAME      1.css.188.13C
EXPNO     1
PROCNO    1
Date_     20140423
Time      15.05
INSTRUM   spect
PROBHD    5 mm PABBO BB/
PULPROG   zgdc
TD        187496
SOLVENT   CDCl3
NS        128
DS        0
SWH       31250.000 Hz
FIDRES    0.166670 Hz
AQ        2.9999859 sec
RG        2050
DW        16.000 usec
DE        6.50 usec
TE        297.9 K
D1        2.00000000 sec
D11       0.03000000 sec
TD0       1
  
```

```

===== CHANNEL f1 =====
SFO1     125.7049802 MHz
NUC1     13C
P1       10.00 usec
SI       1048576
SF       125.6924179 MHz
WDW      no
SSB      0
LB       0.00 Hz
GB       0
PC       1.40
  
```

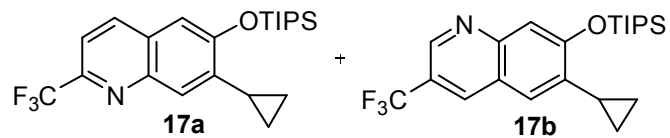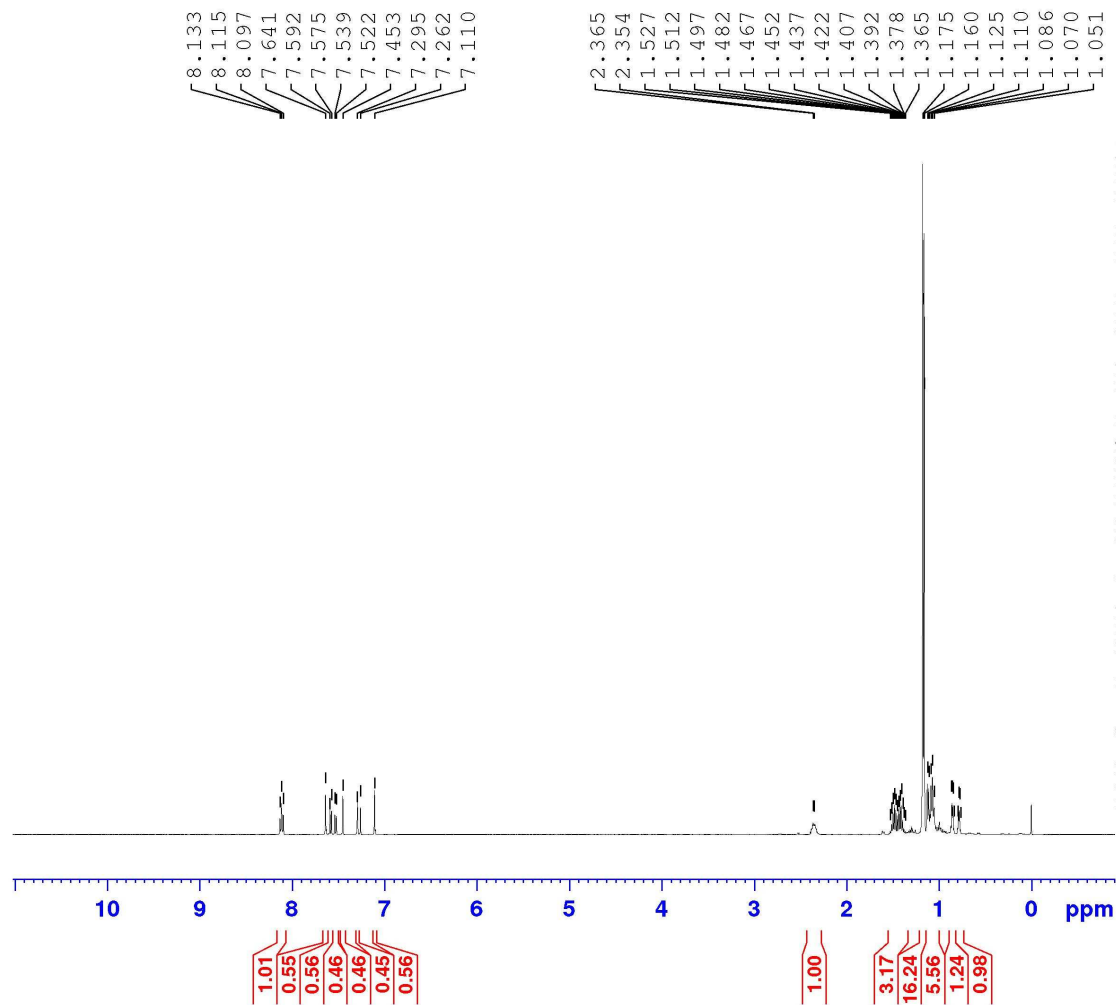

```

Current Data Parameters
NAME      2.css.93.u
EXPNO     1
PROCNO    1

F2 - Acquisition Parameters
Date_     20140527
Time      12.28
INSTRUM   spect
PROBHD    5 mm PATXI 1H/
PULPROG   zg
TD         59998
SOLVENT   CDCl3
NS         8
DS         0
SWH        10000.000 Hz
FIDRES     0.166672 Hz
AQ         2.9999001 sec
RG         30.11
DW         50.000 usec
DE         10.00 usec
TE         295.2 K
D1         8.00000000 sec
TD0        1

===== CHANNEL f1 =====
SFO1      500.1330885 MHz
NUC1       1H
P1         8.00 usec
PLW1      12.19999981 W

F2 - Processing parameters
SI         65536
SF         500.1300135 MHz
WDW        no
SSB        0
LB         0 Hz
GB         0
PC         1.00
  
```

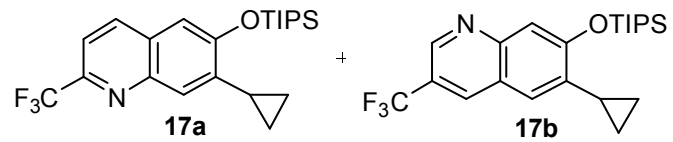

(Reaction Catalyzed with AgNTf<sub>2</sub>)

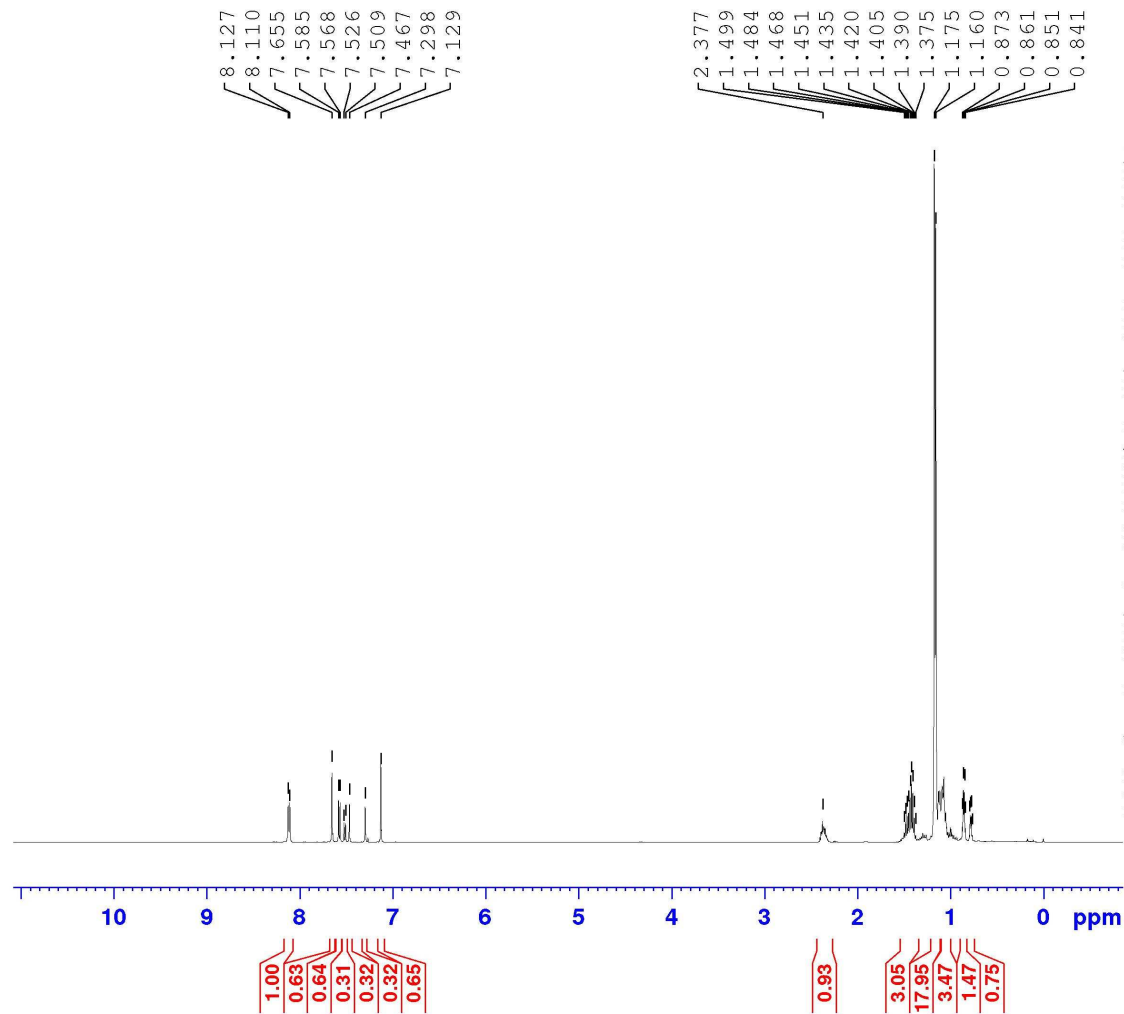

```

Current Data Parameters
NAME      2.css.94.t
EXPNO    1
PROCNO    1

F2 - Acquisition Parameters
Date_     20140529
Time      23.48
INSTRUM   spect
PROBHD    5 mm PABBO BB/
PULPROG   zg
TD         59998
SOLVENT   CDCl3
NS         8
DS         0
SWH        10000.000 Hz
FIDRES     0.166672 Hz
AQ         2.9999001 sec
RG         4.57
DW         50.000 usec
DE         6.50 usec
TE         296.4 K
D1         5.00000000 sec
TD0        1

===== CHANNEL f1 =====
SFO1      499.8730869 MHz
NUC1       1H
P1         10.75 usec
PLW1      18.25000000 W

F2 - Processing parameters
SI         65536
SF         499.8700078 MHz
WDW        no
SSB        0
LB         0 Hz
GB         0
PC         1.00
  
```

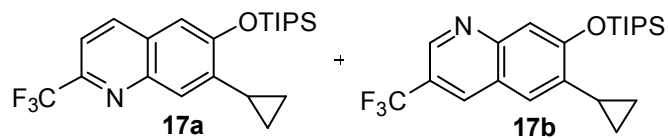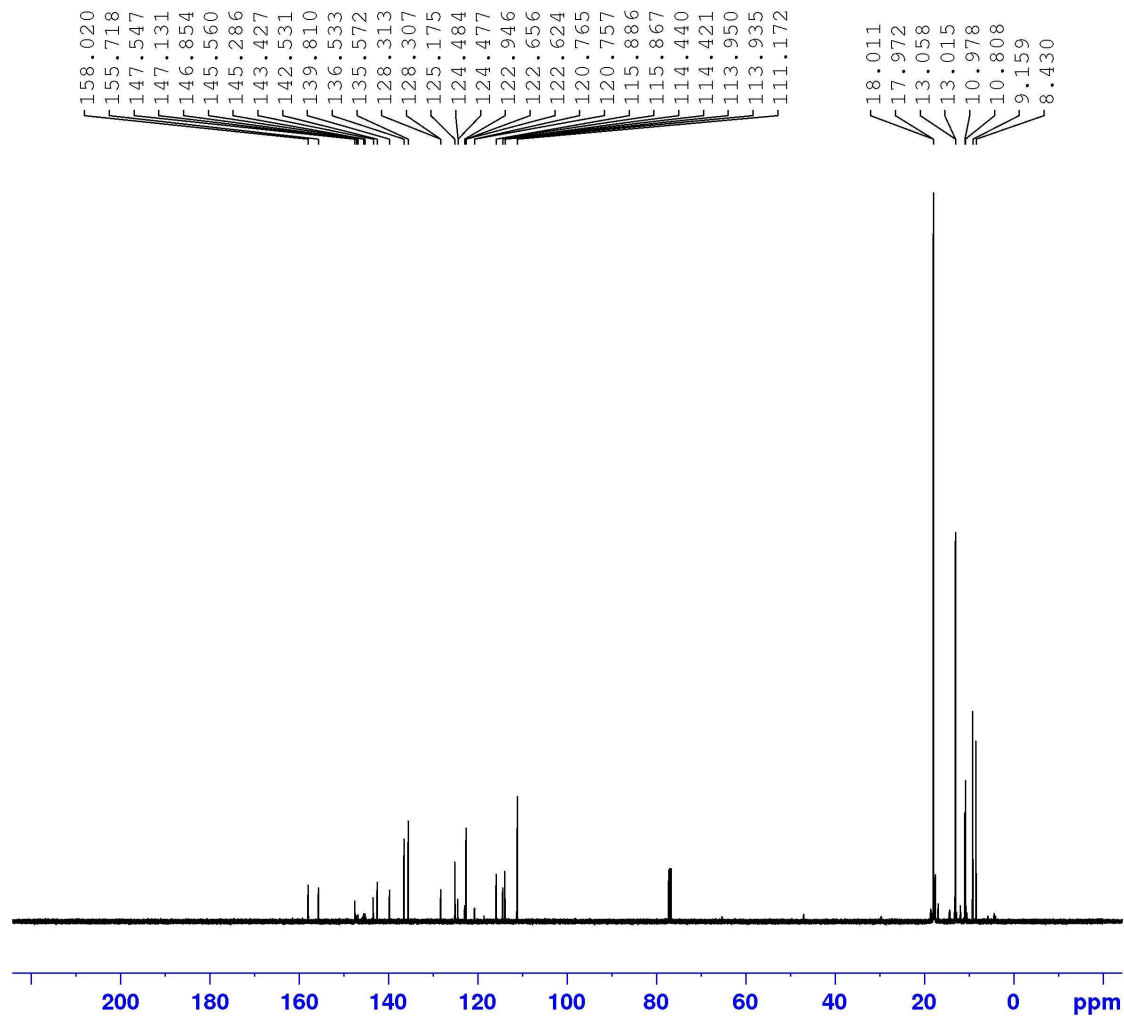

```

Current Data Parameters
NAME      2.css.93.C13
EXPNO     1
PROCNO    1

F2 - Acquisition Parameters
Date_     20140527
Time      13.36
INSTRUM   spect
PROBHD    5 mm PABBO BB/
PULPROG   zgdc
TD         187496
SOLVENT   CDCl3
NS         256
DS         0
SWH        31250.000 Hz
FIDRES     0.166670 Hz
AQ         2.9999361 sec
RG         2050
DW         16.000 usec
DE         6.50 usec
TE         297.2 K
D1         2.00000000 sec
D11        0.03000000 sec
TD0        1

===== CHANNEL f1 =====
SFO1      125.7049802 MHz
NUC1       13C
P1         10.00 usec
PLW1      72.83999634 W

===== CHANNEL f2 =====
SFO2      499.8724993 MHz
NUC2       1H
CFDPRG[2] waltz16
PCPD2     80.00 usec
PLW2      19.00000000 W
PLW12     0.29688001 W

F2 - Processing parameters
SI         1048576
SF         125.6924149 MHz
WDW        no
SSB        0
LB         0 Hz
GB         0
PC         1.40
  
```

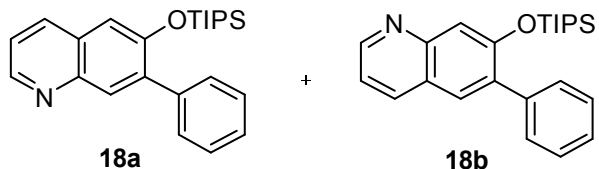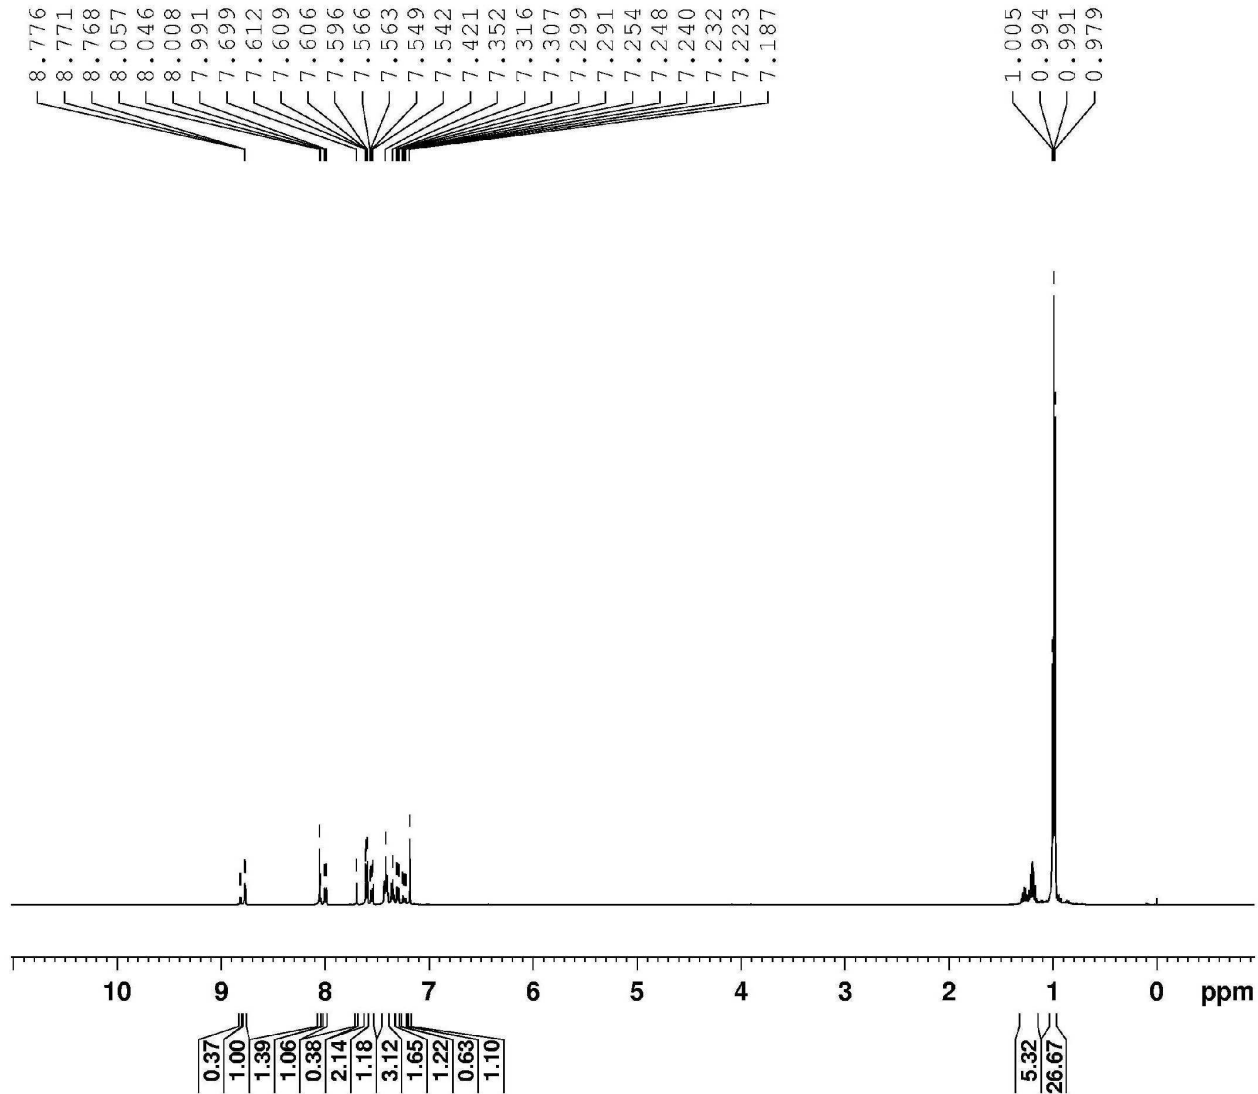

Current Data Parameters  
 NAME 1.css.216  
 EXPNO 1  
 PROCNO 1

F2 - Acquisition Parameters  
 Date\_ 20131203  
 Time 16.13  
 INSTRUM spect  
 PROBHD 5 mm QNP 1H/13  
 PULPROG zg  
 TD 59998  
 SOLVENT CDCl3  
 NS 4  
 DS 0  
 SWH 10000.000 Hz  
 FIDRES 0.166672 Hz  
 AQ 2.9999499 sec  
 RG 16  
 DW 50.000 usec  
 DE 7.50 usec  
 TE 295.0 K  
 D1 8.0000000 sec  
 TD0 1

===== CHANNEL f1 =====  
 NUC1 1H  
 P1 10.00 usec  
 PL 0.00 dB  
 SFO1 499.8740056 MHz

F2 - Processing parameters  
 SI 32768  
 SF 499.8700239 MHz  
 WDW no  
 SSB 0  
 LB 0.00 Hz  
 GB 0  
 PC 1.00

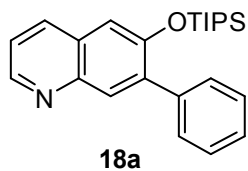

+

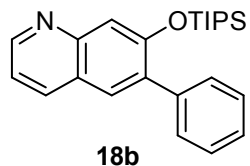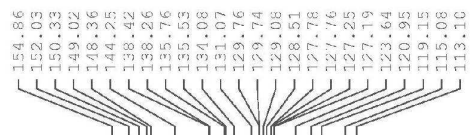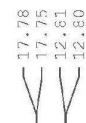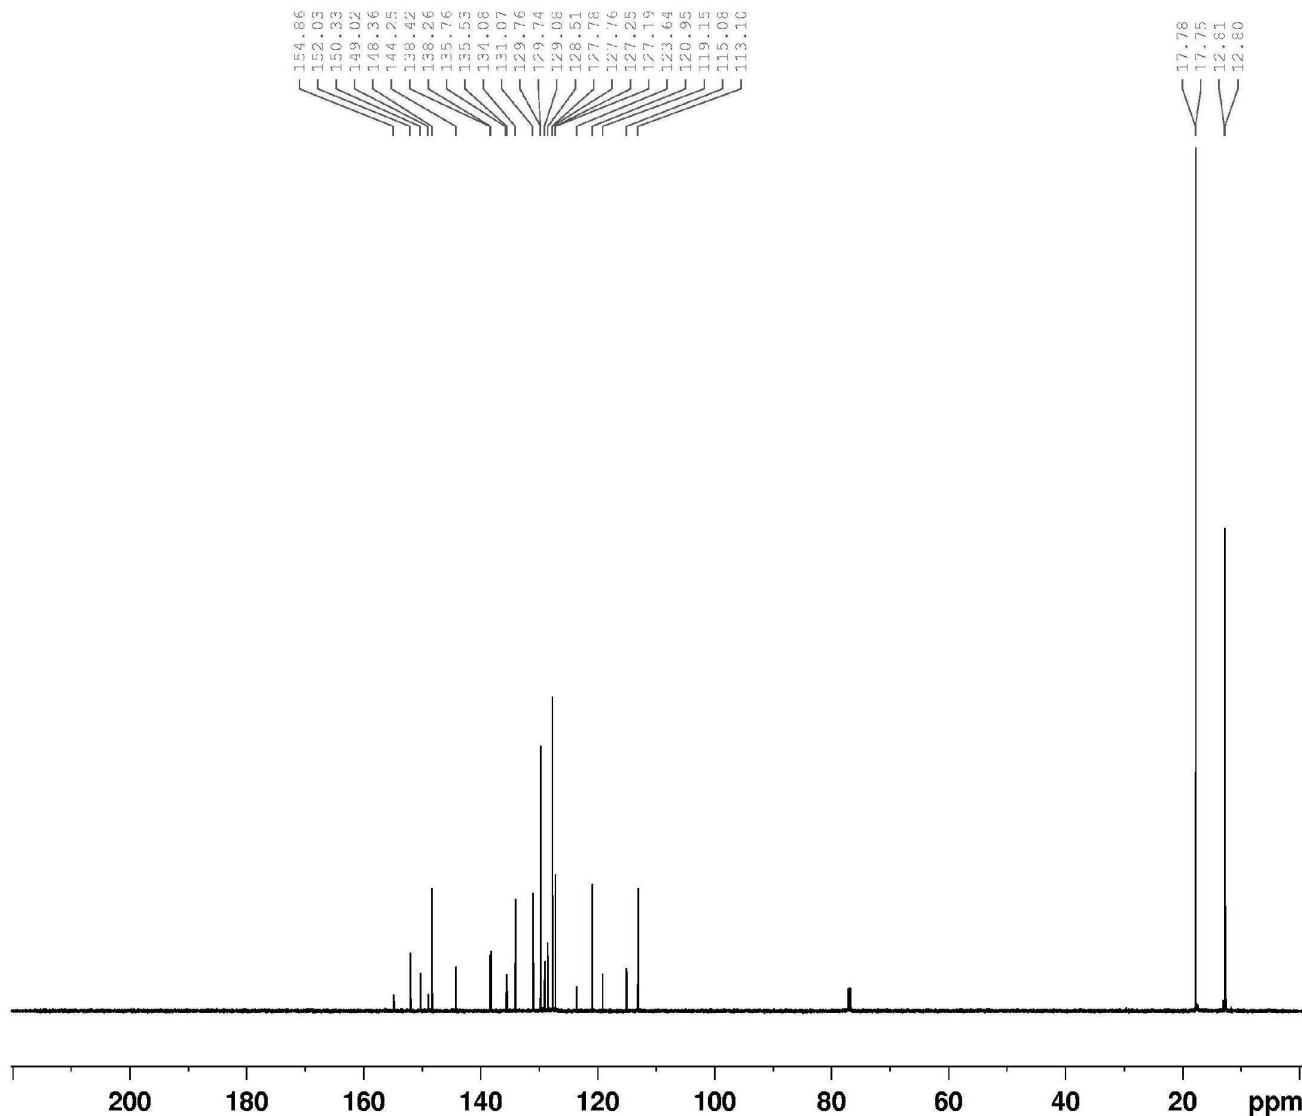

```

Current Data Parameters
NAME      1.ccs.216.13C
EXPNO     1
PROCNO    1

F2  Acquisition Parameters
Date      20131203
Time      16.38
INSTRUM   spect
PROBHD    5 mm QNP 1H/13
PULPROG   zgdc
TD         142854
SOLVENT   CDCl3
NS         200
DS         0
SWH        27777.777 Hz
FIDRES     0.194449 Hz
AQ         2.5714221 sec
RG         13004
CW         18.000 usec
DE         7.50 usec
TE         295.6 K
J1         2.00000000 sec
d11        0.03000000 sec
T30        1

----- CHANNEL #1 -----
NUC1       13C
P1         8.50 usec
PL1        0.00 dB
SFO1       125.7062372 MHz

===== CHANNEL #2 =====
CPDPRG2    waltz16
NUC2       1H
PCPD2      90.00 usec
PL2        1.00 dB
PL12       21.00 dB
SFO2       499.8734991 MHz

F2 - Processing parameters
SI         65536
SF         125.6924292 MHz
WDW        no
SSB        0
LB         0.00 Hz
GB         0
PC         1.40
  
```



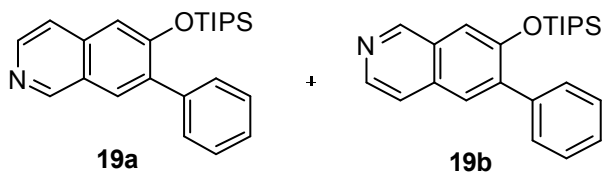

9.164  
 8.448  
 7.892  
 7.752  
 7.562  
 7.463  
 7.447  
 7.433  
 7.363  
 7.287  
 7.202

1.293  
 1.280  
 1.265  
 1.250  
 1.235  
 1.221  
 1.206  
 1.194  
 1.026  
 1.011

```

NAME          1.css.232
EXPNO         1
PROCNO        1
Date_         20140123
Time          11.46
INSTRUM       spect
PROBHD        5 mm PATXI 1H/
PULPROG       zg
TD            59998
SOLVENT       CDCl3
NS            4
DS            0
SWH           10000.000 Hz
FIDRES        0.166672 Hz
AQ            2.9999499 sec
RG            7.89
DW            50.000 usec
DE            10.00 usec
TE            295.2 K
D1            8.00000000 sec
TDC           1
  
```

```

===== CHANNEL f1 =====
SFO1          500.1330885 MHz
NUC1          1H
P1            8.00 usec
SI            65536
SF            500.1330000 MHz
WDW           no
SSB           0
LB            0.00 Hz
GB            0
PC            1.00
  
```

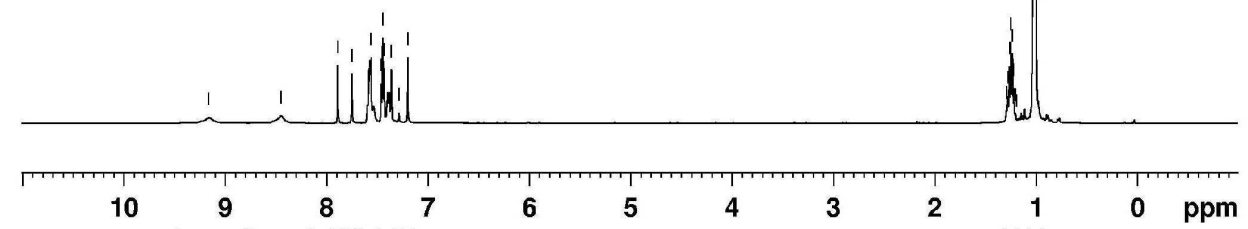

0.89  
 0.93  
 0.54  
 0.46  
 3.01  
 3.69  
 0.65

3.37  
 18.00



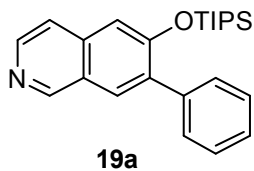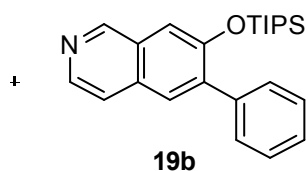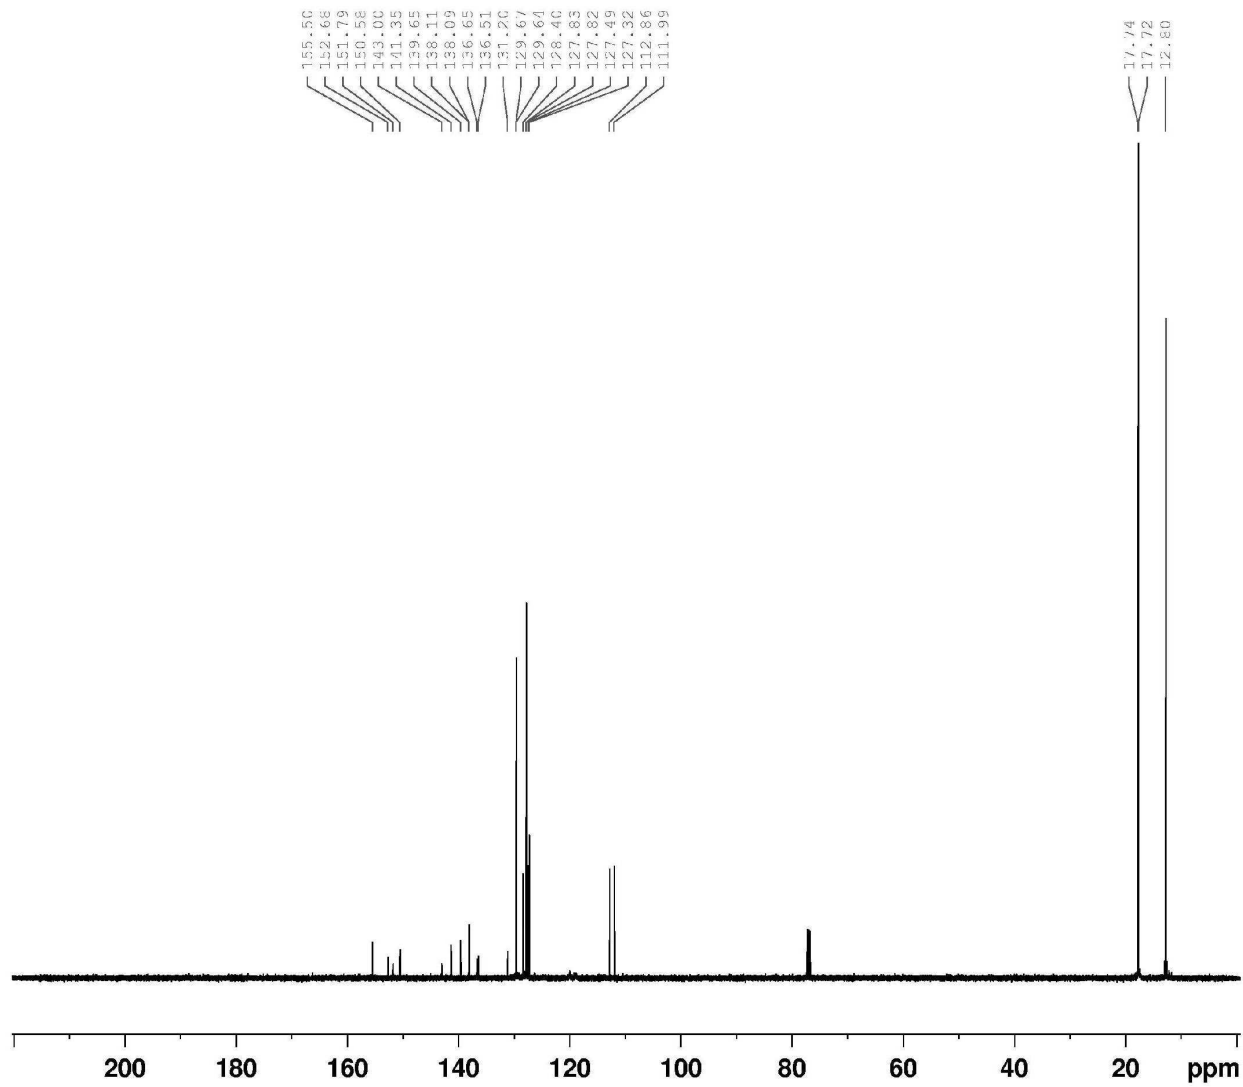

Current Data Parameters  
 NAME 1.ccs.225.13c  
 EXPNO 1  
 PROCNO 1

F2 - Acquisition Parameters  
 Date\_ 20140113  
 Time 15.22  
 INSTRUM spect  
 PROBHD 5 mm QNP 1H/13  
 PULPROG zgpg  
 TD 142854  
 SOLVENT CDCl3  
 NS 256  
 DS 0  
 SWH 27777.777 Hz  
 FIDRES 0.194449 Hz  
 AQ 2.5714221 sec  
 RG 11585.2  
 DW 18.000 usec  
 DE 7.50 usec  
 TE 295.4 K  
 d1 2.0000000 sec  
 d11 0.0300000 sec  
 TD0 1

===== CHANNEL f1 =====  
 NUC1 13C  
 P1 8.50 usec  
 PL1 0.00 dB  
 SFO1 125.7662372 MHz

===== CHANNEL f2 =====  
 CPDPRG2 waltz16  
 NUC2 1H  
 PCPD2 90.30 usec  
 PL2 1.30 dB  
 PL12 21.30 dB  
 SFO2 499.8734991 MHz

F2 - Processing parameters  
 SI 65536  
 SF 125.6924284 MHz  
 WDW no  
 SSB 0  
 LB 0.00 Hz  
 GB 0  
 PC 1.40

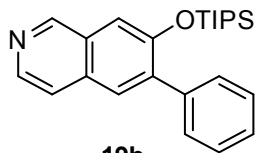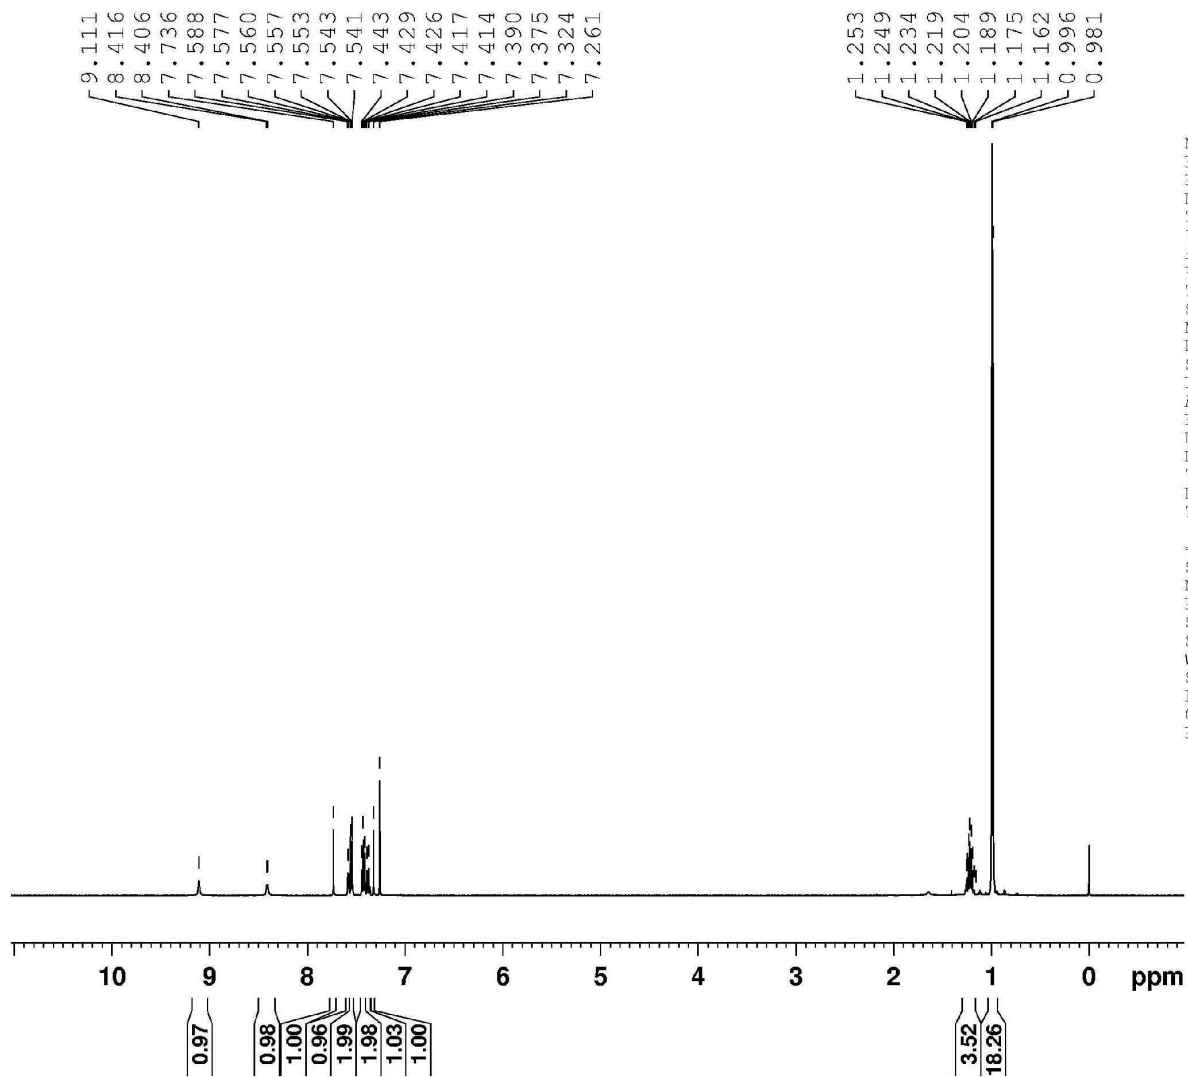

```

NAME      1.css.232.spota
EXPNO     1
PROCNO    1
Date_     20140123
Time      18.21
INSTRUM   spect
PROBHD    5 mm PATXI 1H/
PULPROG   zg
TD         59998
SOLVENT   CDCl3
NS         8
DS         0
SWH       10000.000 Hz
FIDRES    0.166672 Hz
AQ        2.9999499 sec
RG        110.37
DW        50.000 usec
DE        10.00 usec
TE        295.5 K
D1        5.00000000 sec
TDC       1
  
```

```

----- CHANNEL f1 -----
SFO1     500.1330885 MHz
NUC1     1H
P1       8.00 usec
SI       65536
SF       500.1300133 MHz
WDW      no
SSB      0
LB       0.00 Hz
GB       0
PC       1.00
  
```

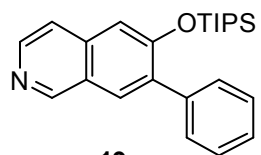

19a

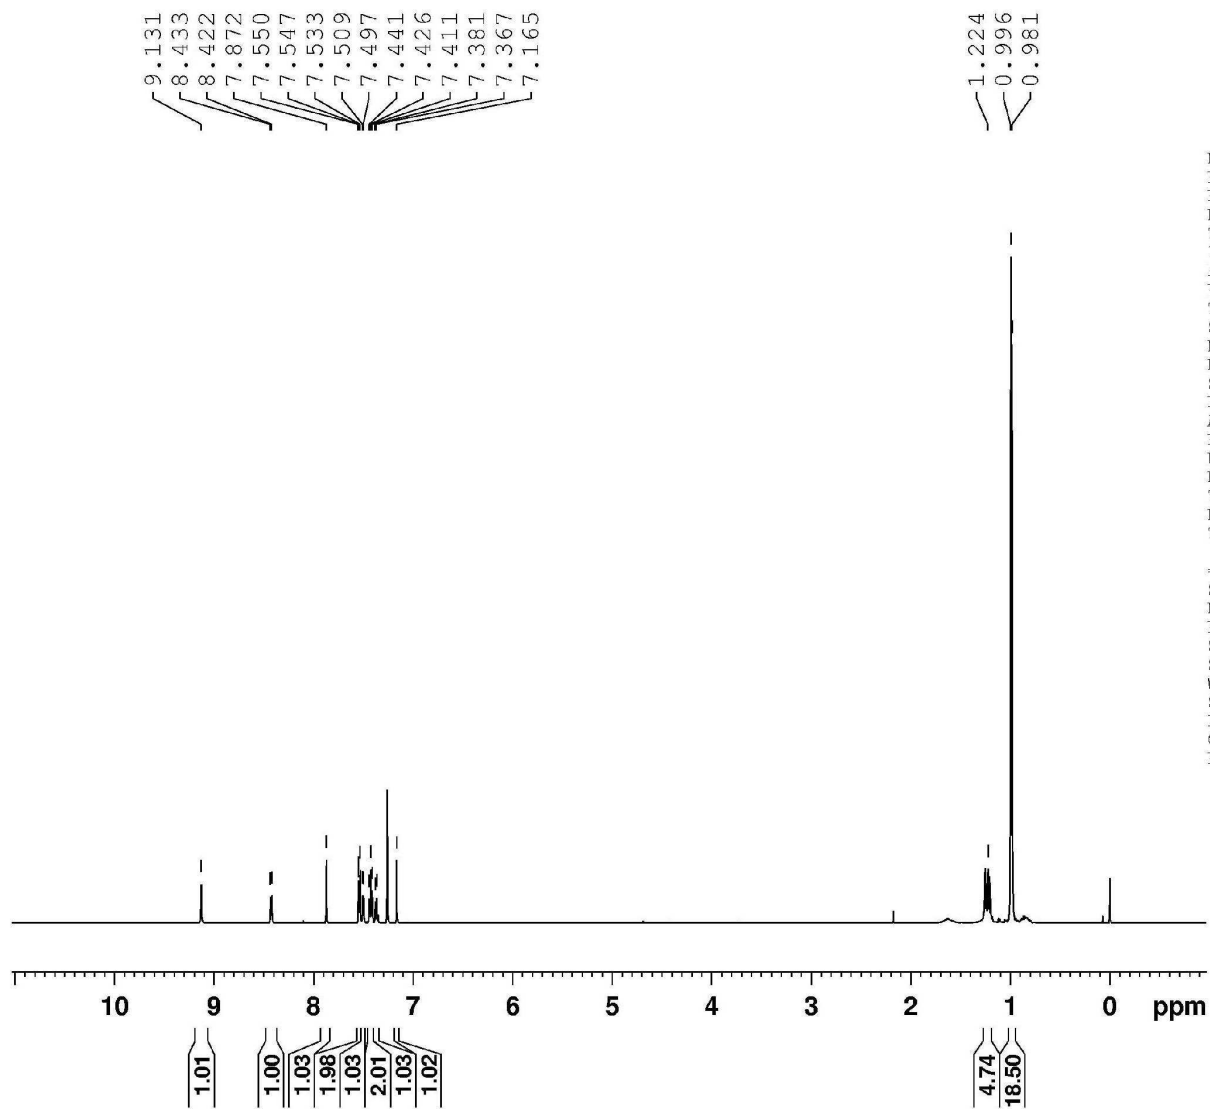

```

NAME      1.css.232.spotb.2
EXPNO     1
PROCNO    1
Date_     20140124
Time      13.17
INSTRUM   spect
PROBHD    5 mm PATXI 1H/
PULPROG   zg
TD         59998
SOLVENT   CDCl3
NS         8
DS         0
SWH       10000.000 Hz
FIDRES    0.166672 Hz
AQ        2.9999499 sec
RG        155.5
DW        50.000 usec
DE        10.00 usec
TE        295.5 K
D1        5.00000000 sec
TDC       1
  
```

```

===== CHANNEL f1 =====
SF01     500.1330885 MHz
NUC1      1H
P1        8.00 usec
SI        65536
SF        500.1300131 MHz
WDW       no
SSB       0
LB        0.00 Hz
GB        0
PC        1.00
  
```

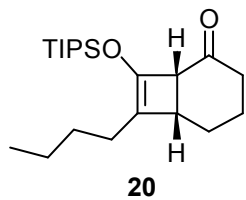

7.292

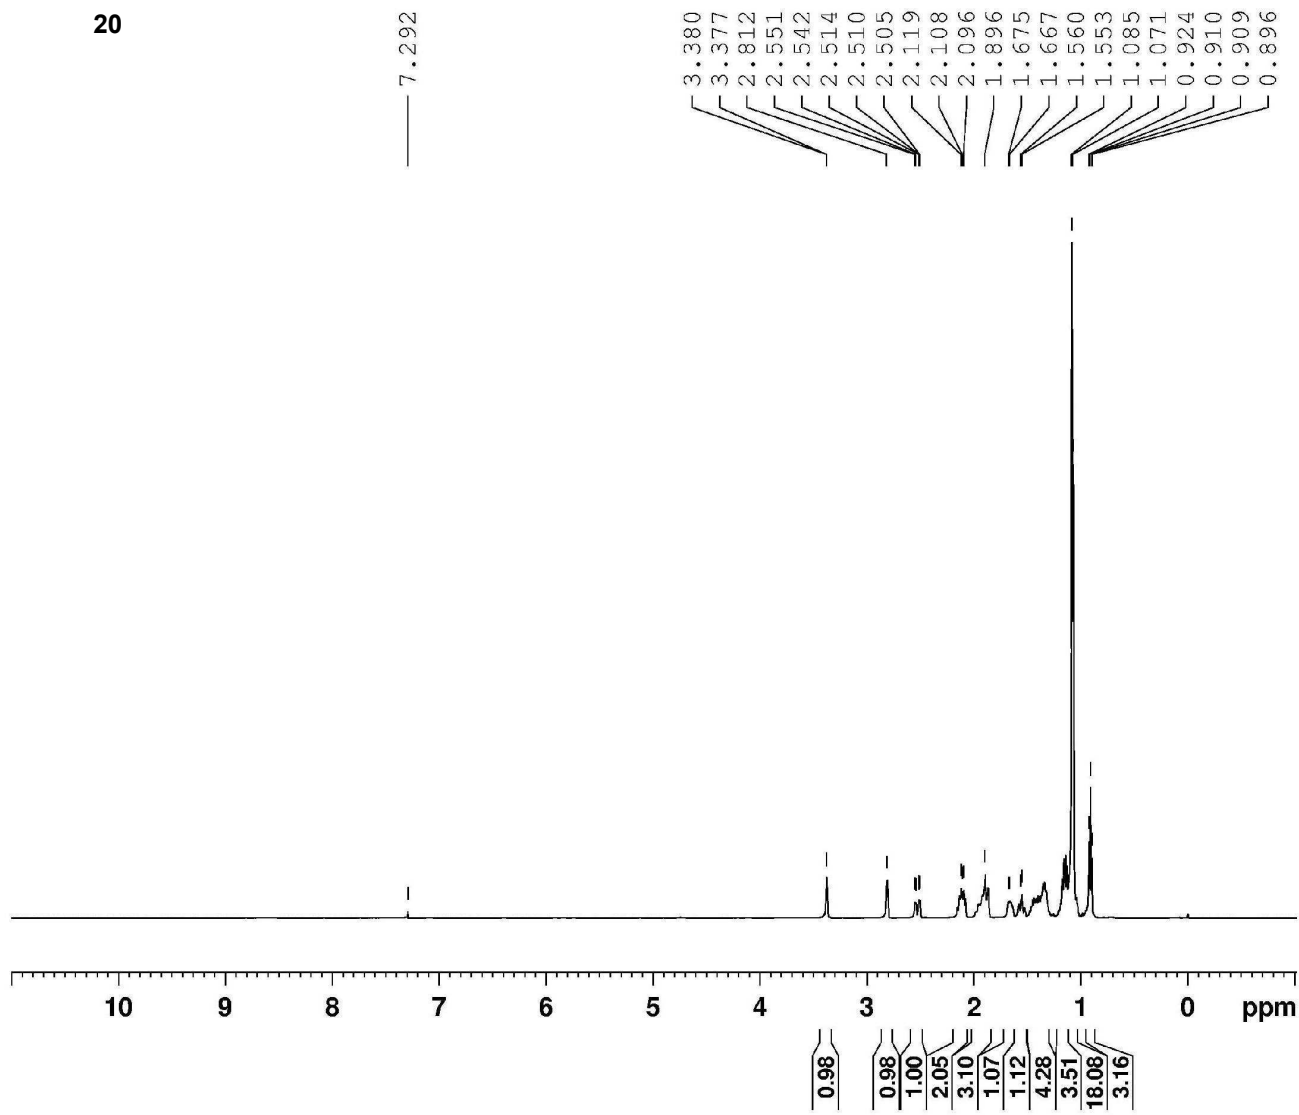

Current Data Parameters  
 NAME 1.css.223.4  
 EXPNO 1  
 PROCNO 1

F2 - Acquisition Parameters  
 Date\_ 20131220  
 Time 15.10  
 INSTRUM spect  
 PRRPFD 5 mm QNP 1H/13  
 PULPROG zg  
 TD 59998  
 SOLVENT CDCl3  
 NS 16  
 DS 0  
 SWH 10000.000 Hz  
 FIDRES 3.166672 Hz  
 AQ 2.9999499 sec  
 RG 11.3  
 DW 50.000 usec  
 DE 7.50 usec  
 TE 294.8 K  
 D1 8.3000000 sec  
 YD0 1

===== CHANNFT, f1 =====  
 KUC1 1H  
 P1 10.00 usec  
 PL1 0.00 dB  
 SF01 499.8740056 MHz

F2 - Processing parameters  
 SI 32768  
 SF 499.8700049 MHz  
 WDW mc  
 SSB 0  
 LB 0.00 Hz  
 GB 0  
 PC 1.00

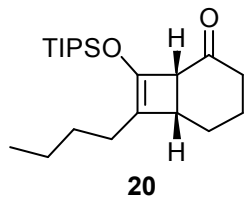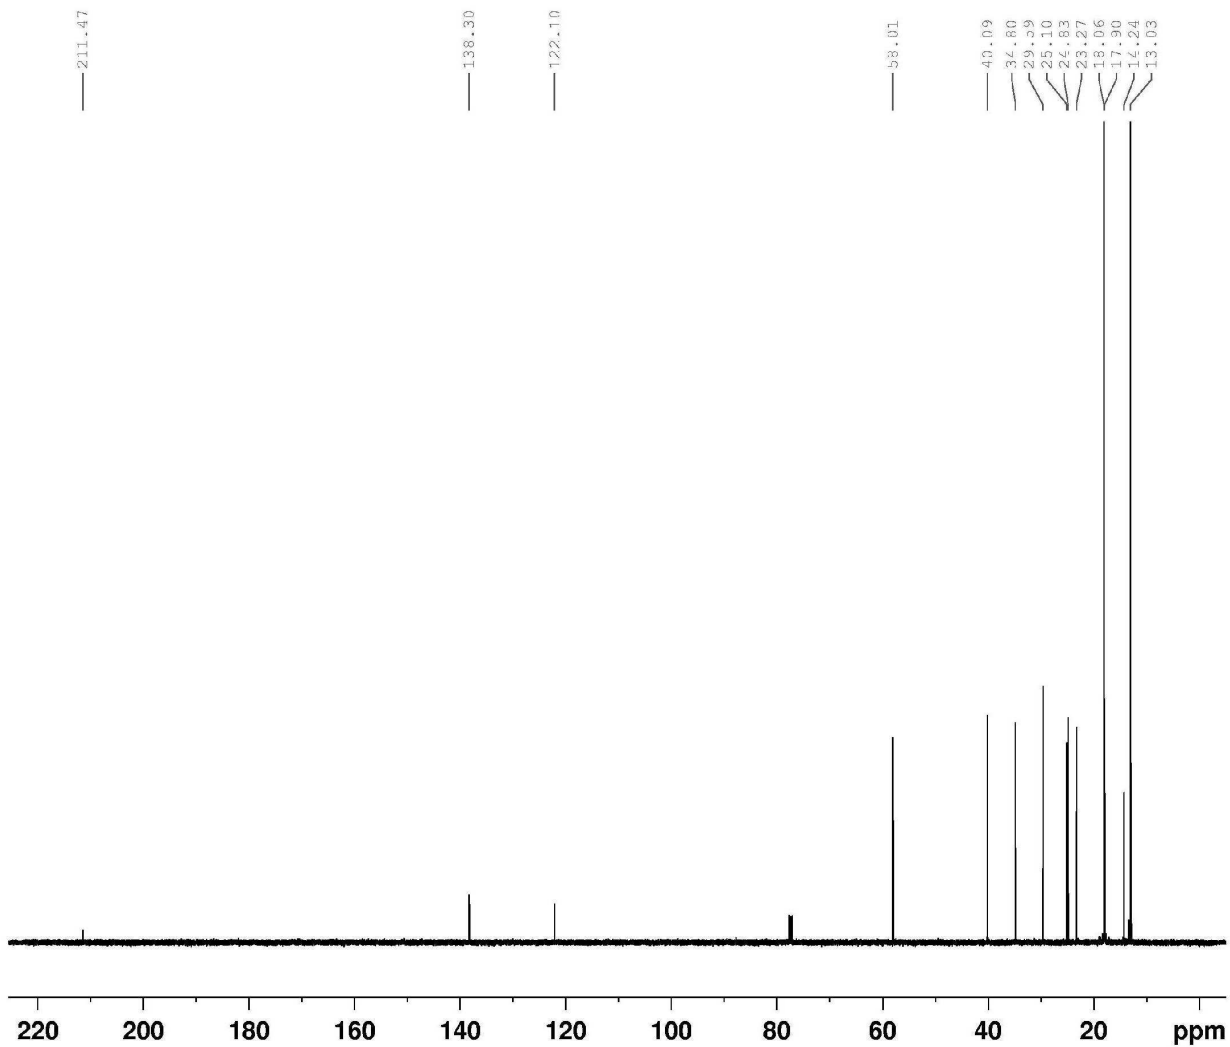

```

NAME      1.css.223.13C.2
EXENCO    1
PROCNO    1
Date_     20131220
Time      9.02
INSTRUM   spect
PROBHD    5 mm QNP 1H/13
PULPROG   zgpg30
TD        142854
SOLVENT   CDCl3
NS        128
DS        0
SWH1      25985.508 Hz
FIDRES    0.202903 Hz
AQ        2.4642816 sec
RG        7298.2
DW        17.250 usec
DL        7.50 usec
TE        295.4 K
D1        2.0000000 sec
d11       0.0300000 sec
TDC       1

===== CHANNEL f1 =====
NUC1      13C
P1        8.50 usec
PL1       0.00 dB
SFO1     125.7062372 MHz

===== CHANNEL f2 =====
CPDPRG2   waltz16
NUC2      1H
PCPD2     90.00 usec
PL2       1.00 dB
PL12     21.00 dB
SFO2     499.8734991 MHz
SI        65536
SF        125.6923718 MHz
WDW       no
SSE       0
LB        0.00 Hz
GB        0
PC        1.40

```

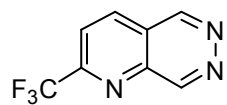

30

9.946  
9.744  
8.598  
8.581  
8.214  
8.197

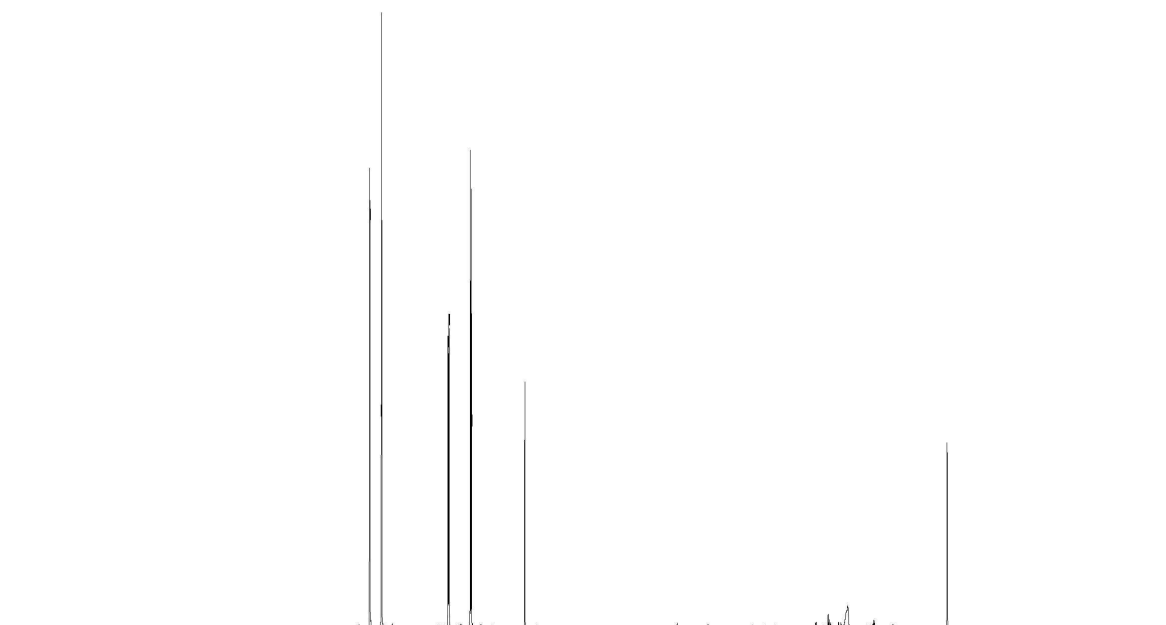

1.00  
1.06  
1.10  
1.09

Current Data Parameters  
NAME 2.css.89.u  
EXPNO 1  
PROCNO 1

F2 - Acquisition Parameters  
Date\_ 20140520  
Time 14.06  
INSTRUM spect  
PROBHD 5 mm PATXI 1H/  
PULPROG zg  
TD 59998  
SOLVENT CDCl3  
NS 8  
DS 0  
SWH 10000.000 Hz  
FIDRES 0.166672 Hz  
AQ 2.9999001 sec  
RG 196.79  
DW 50.000 usec  
DE 10.00 usec  
TE 294.9 K  
D1 5.00000000 sec  
TD0 1

==== CHANNEL f1 =====  
SFO1 500.1330885 MHz  
NUC1 1H  
P1 8.00 usec  
PLW1 12.19999981 W

F2 - Processing parameters  
SI 65536  
SF 500.1300077 MHz  
WDW no  
SSB 0  
LB 0 Hz  
GB 0  
PC 1.00

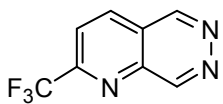

30

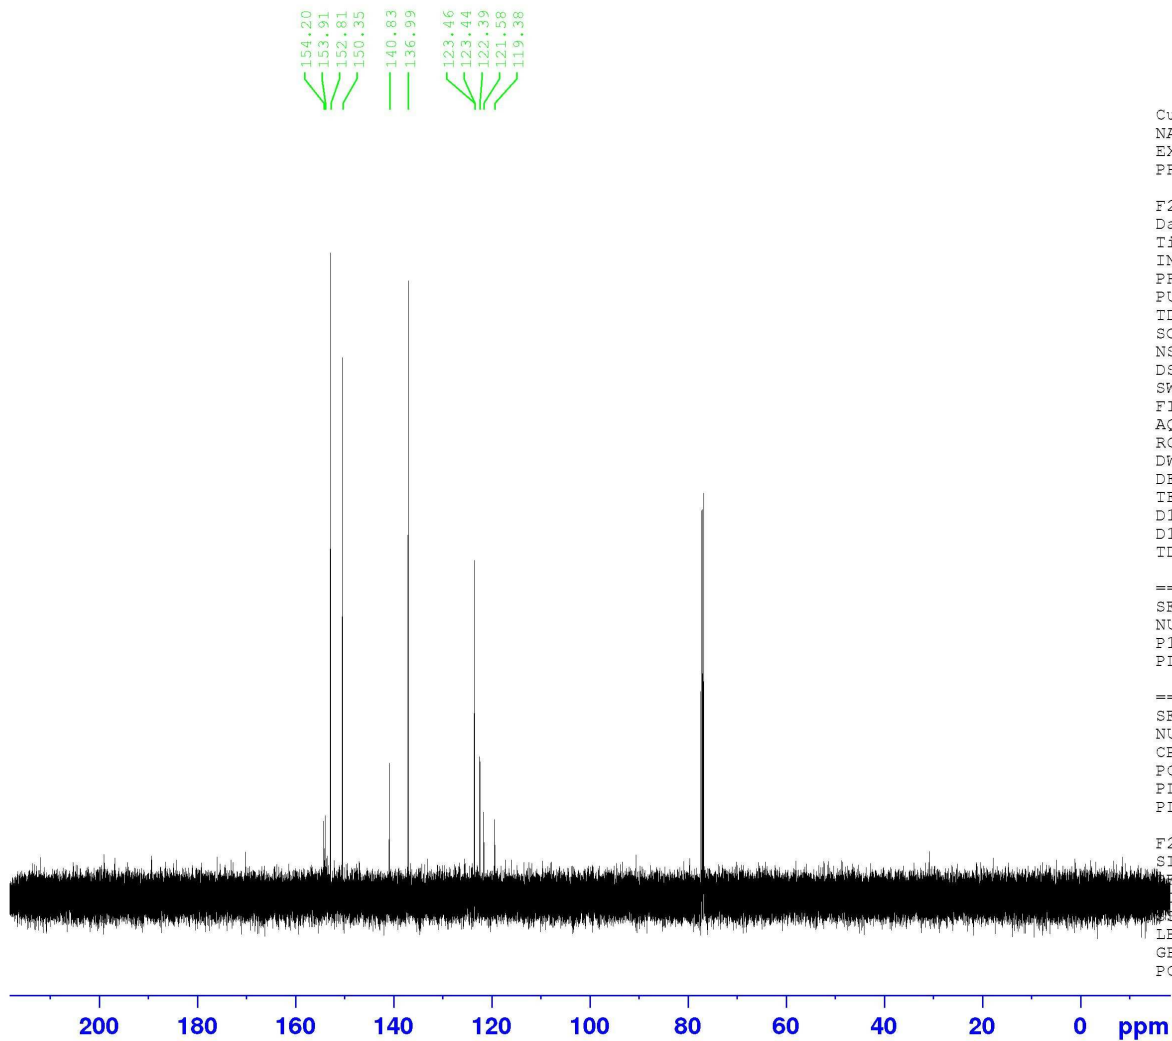

Current Data Parameters  
 NAME 2.css.89.C\_13  
 EXPNO 1  
 PROCNO 1

F2 - Acquisition Parameters  
 Date\_ 20140520  
 Time 16.13  
 INSTRUM spect  
 PROBHD 5 mm PATXI 1H/  
 PULPROG zgdc  
 TD 178568  
 SOLVENT CDC13  
 NS 256  
 DS 0  
 SWH 29761.904 Hz  
 FIDRES 0.166670 Hz  
 AQ 2.9999423 sec  
 RG 196.79  
 DW 16.800 usec  
 DE 10.00 usec  
 TE 295.4 K  
 D1 2.00000000 sec  
 D11 0.03000000 sec  
 TD0 1

==== CHANNEL f1 =====  
 SFO1 125.7703643 MHz  
 NUC1 13C  
 P1 14.00 usec  
 PLW1 170.0000000 W

==== CHANNEL f2 =====  
 SFO2 500.1320005 MHz  
 NUC2 1H  
 CPDPRG[2] waltz16  
 PCPD2 90.00 usec  
 PLW2 12.19999981 W  
 PLW12 0.20893000 W

F2 - Processing parameters  
 SI 131072  
 SF 125.7577968 MHz  
 DW no  
 PSB 0  
 LB 0 Hz  
 GB 0  
 PC 1.40

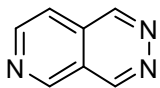

32

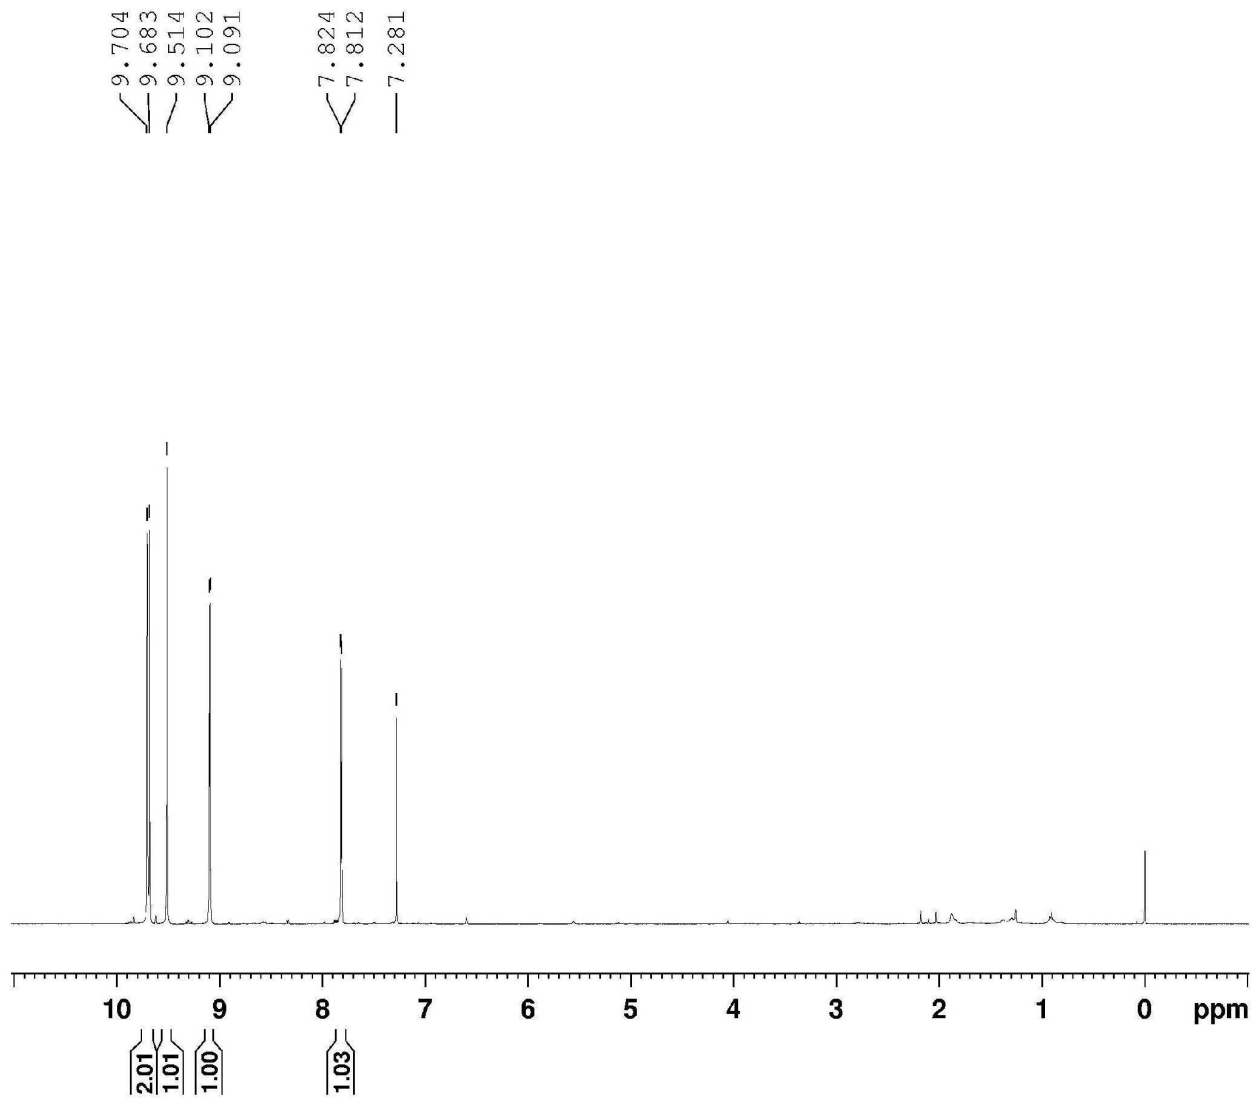

Current Data Parameters  
 NAME 1.css.231.t  
 EXPNO 1  
 PROCNO 1

F2 Acquisition Parameters  
 Date\_ 20140123  
 Time 14.52  
 INSTRUM spect  
 PROBHD 5 mm PAIX1 1H/  
 PUI:PROC zg  
 TD 59998  
 SOLVENT CDCl3  
 NS 8  
 DS 0  
 SWH 10000.000 Hz  
 FIDRES 0.166672 Hz  
 AQ 2.9999001 sec  
 RG 175.42  
 DW 50.000 usec  
 DE 10.00 usec  
 TF 295.6 K  
 DL 8.0000000 sec  
 TDO 1

----- CHANNEL f1 -----  
 SFO1 500.1330885 MHz  
 NUC1 1H  
 PC 8.00 usec  
 PLW1 12.19999981 W

F2 - Processing parameters  
 SI 65536  
 SF 500.1300030 MHz  
 WDW no  
 SSB 0  
 LB 0 Hz  
 GB 0  
 PC 1.00



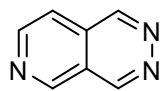

32

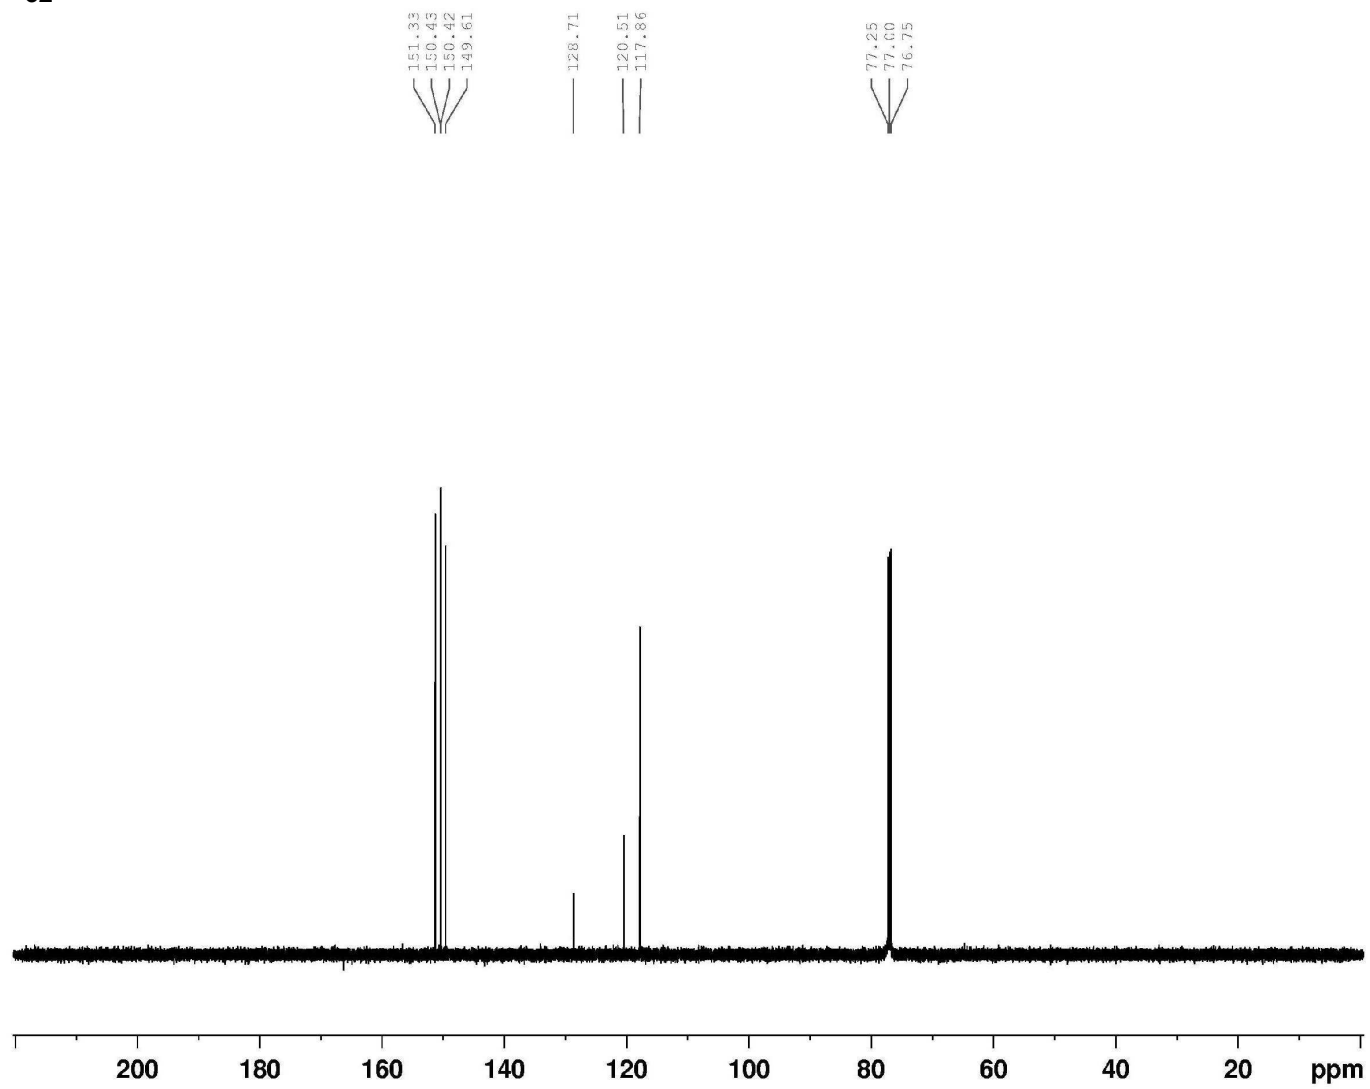

1.css.231.13C.2
